# Supplementary material for: Metal-free synthesis of ketonitrilesviaC–F bond cleavage
Source: Royal Society of Chemistry journal article supplement (doi:10.1039/d2nj06338g), 2023-01-01
Supplement: d2nj06338g1.pdf [file d2nj06338g1.pdf]

## Supporting Information

# Metal-Free Synthesis of Ketonitriles via C-F Bond Cleavage

Ge Gao and Zhiping Li\*

Department of Chemistry, Renmin University of China, Beijing 100872 (China)

*Email:* [zhipingli@ruc.edu.cn](mailto:zhipingli@ruc.edu.cn)

## Contents

|                                                                                                      |     |
|------------------------------------------------------------------------------------------------------|-----|
| 1. General information                                                                               | S3  |
| 2. Synthesis of the substrates <b>1</b>                                                              | S4  |
| 3. Synthesis and characterization for the products <b>3</b>                                          | S5  |
| 4. Synthesis and characterization for the products <b>4-6</b>                                        | S12 |
| 5. References                                                                                        | S14 |
| 6. Copies of $^1\text{H}$ NMR, $^{13}\text{C}$ NMR and $^{19}\text{F}$ NMR spectra for all compounds | S15 |

## 1. General information

<sup>1</sup>H NMR spectra were recorded on Bruker 600 MHz spectrometer and the chemical shifts were reported in parts per million ( $\delta$ ) relative to internal standard TMS (0 ppm) for CDCl<sub>3</sub>. The peak patterns are indicated as follows: s, singlet; d, doublet; dd, doublet of doublet; t, triplet; m, multiplet; q, quartet. The coupling constants, *J*, are reported in Hertz (Hz). <sup>13</sup>C NMR spectra were obtained at Bruker 150 MHz and referenced to the internal solvent signals (central peak is 77.0 ppm in CDCl<sub>3</sub>). <sup>19</sup>F NMR spectra were obtained at Bruker 564 MHz. CDCl<sub>3</sub> was used as the NMR solvent. High-resolution mass spectra (HRMS) were acquired on Thermo Q-Exactive instrument (quadrupole mass analyzer) using electrospray ionization mode (ESI). Flash column chromatography was performed over silica gel 200-300. All reagents were weighed and handled in air at room temperature. All chemical reagents were purchased from Alfa, Aldrich, TCI, and J&K and used without further purification.

## 2. Synthesis of the substrates 1

**Method A:** For synthesis of **1a-1k**.<sup>1</sup>

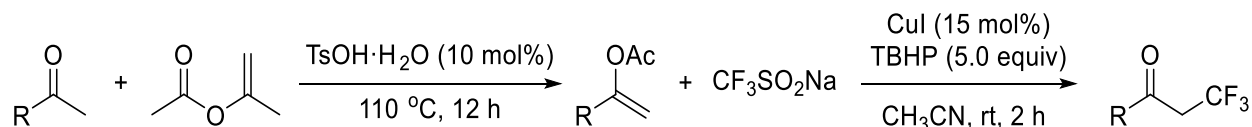

**Step 1:** The substrates  $\alpha$ -CF<sub>3</sub> ketones (**1a-1k**) were synthesized according to the literature. To a mixture of the ketone (5.0 mmol) and isopropenyl acetate (25.0 mmol) was added *p*-TsOH·H<sub>2</sub>O (0.5 mmol). The resulting mixture was refluxed overnight. The acetone formed was continuously distilled off. The reaction mixture was cooled to room temperature and diluted with ethyl acetate (20.0 mL) and water (30.0 mL). The aqueous layer was extracted with ethyl acetate (2 x 20.0 mL). The combined organic layers were dried over Na<sub>2</sub>SO<sub>4</sub> and the solvent was evaporated in vacuo. The resulting crude mixture was purified by column chromatography using silica gel (200-300 mesh size) and petroleum ether/EtOAc (30:1 to 2:1) as the eluent.

**Step 2:** A flame-dried reaction vessel with a magnetic stirring bar was charged with CF<sub>3</sub>SO<sub>2</sub>Na (124.8 mg, 0.8 mmol, 4.0 equiv.), CuI (5.7 mg, 0.03 mmol, 0.15 equiv.), enol acetates (0.2 mmol, 1.0 equiv.) and MeCN (1.0 mL) in sequence. After the reaction mixture was cooled to 0 °C using an ice bath, an aqueous solution of TBHP (70% solution in water, 1.0 mmol, 5.0 equiv.) was slowly added dropwise with stirring. The mixture was stirred in the air at room temperature and the progress of the reaction was monitored by TLC (2-12 h). The resulting mixture was concentrated under reduced pressure. After evaporation, the residue was purified by column chromatography using silica gel (200-300 mesh size) and *n*-hexane/CH<sub>2</sub>Cl<sub>2</sub> as the eluent.

**Method B:** For synthesis of **1m-1r**.<sup>2</sup>

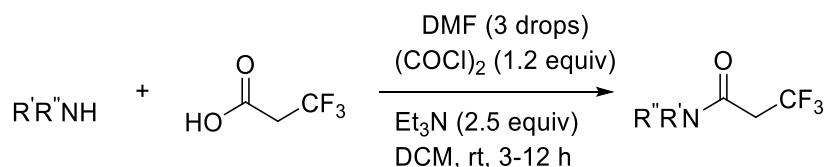

To a stirred suspension of 3,3,3-trifluoropropionic acid (1.3 equiv) in dichloromethane (4.0 mL) was added oxalyl chloride (1.2 equiv) followed by three drops of DMF at 0 °C. The reaction mixture was

stirred at room temperature for 3 h. To this solution was added a solution of anilines (1.0 mmol) in dichloromethane (2.0 mL) followed by triethylamine (2.5 equiv) at 0 °C. The reaction mixture was stirred for 12-24 h and then washed with water (3.0 mL) and 1 N HCl (3.0 mL). The organic layer was dried over Na<sub>2</sub>SO<sub>4</sub> and evaporated to afford a residue, which was purified by flash column chromatography (petroleum ether/ethyl acetate) to afford trifluoropropanamides.

**Method C:** For synthesis of **1s-1w**.<sup>3</sup>

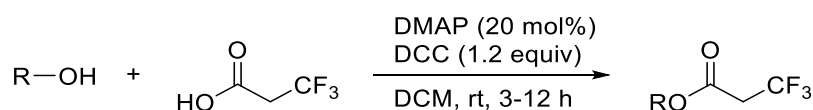

3,3,3-Trifluoropropanoates (**1s-1w**) were synthesized according to the reported literature. To a stirred solution of alcohol in anhydrous CH<sub>2</sub>Cl<sub>2</sub> (3.0 mL/mmol) was added 3,3,3-trifluoropropanic acid (1.5 equiv), and DMAP (0.2 equiv). The reaction mixture was cooled to 0 °C and DCC (1.2 equiv) was added. After stirring at 0 °C for 0.5 h, the mixture was warmed to 25 °C and the progress of the reaction was monitored by TLC (3-12 h). After the reaction finished, the mixture was filtered and the filtrate was evaporated in vacuo. The residue was purified by flash chromatography on silica gel to deliver the corresponding α-CF<sub>3</sub> ester as gum.

### 3. Synthesis and characterization for the products **3**

To a Schlenk tube were added α-CF<sub>3</sub> Carbonyls **1** (0.2 mmol), K<sub>2</sub>CO<sub>3</sub> (0.5 equiv) and MeCN (1.0 mL) in air at room temperature. Subsequently, aqueous ammonia **2a** (160.0 μL, 2.0 mmol) was added to the mixture, and the resulting mixture was stirred at 50 °C for 12 h. The organic phase was evaporated under vacuo. The residue was purified by flash column chromatography on silica gel to give the desired products **3**.

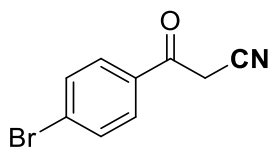

**3-(4-Bromophenyl)-3-oxopropanenitrile (3a)**.<sup>4</sup> (42 mg, 95%). Isolated by column chromatography on silica gel (petroleum ether/ethyl acetate = 3:1, R<sub>f</sub> = 0.5); <sup>1</sup>H NMR (600 MHz, CDCl<sub>3</sub>, ppm) δ 7.79 (d, J = 8.6 Hz, 2H), 7.67 (d, J = 8.6 Hz, 2H), 4.05 (s, 2H); <sup>13</sup>C NMR (150 MHz, CDCl<sub>3</sub>, ppm) δ 186.2, 133.0, 132.6, 130.3, 129.9, 113.4, 29.4; HRMS (ESI) calcd for C<sub>9</sub>H<sub>6</sub>BrNNaO [M + Na<sup>+</sup>], 245.9525;

found: 245.9522.

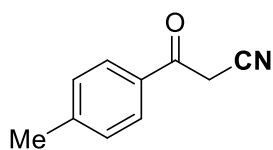

**3-Oxo-3-(*p*-tolyl)propanenitrile (3b).**<sup>4</sup> (18 mg, 56%). Isolated by column chromatography on silica gel (petroleum ether/ethyl acetate = 3:1,  $R_f$  = 0.4); <sup>1</sup>H NMR (600 MHz, CDCl<sub>3</sub>, ppm)  $\delta$  7.82 (d,  $J$  = 8.2 Hz, 2H), 7.32 (t,  $J$  = 8.2 Hz, 2H), 4.05 (s, 2H), 2.44 (s, 3H); <sup>13</sup>C NMR (150 MHz, CDCl<sub>3</sub>, ppm)  $\delta$  186.6, 146.0, 131.8, 129.8, 128.6, 113.9, 29.2, 21.8; HRMS (ESI) calcd for C<sub>10</sub>H<sub>9</sub>NNaO [M + Na<sup>+</sup>], 182.0576; found: 182.0577.

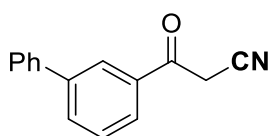

**3-([1,1'-Biphenyl]-3-yl)-3-oxopropanenitrile (3c).**<sup>5</sup> (31 mg, 70%). Isolated by column chromatography on silica gel (petroleum ether/ethyl acetate = 3:1,  $R_f$  = 0.5); <sup>1</sup>H NMR (600 MHz, CDCl<sub>3</sub>, ppm)  $\delta$  7.92 (d,  $J$  = 8.4 Hz, 2H), 7.67 (d,  $J$  = 8.4 Hz, 2H), 7.56 (d,  $J$  = 7.6 Hz, 2H), 7.42 (t,  $J$  = 7.2 Hz, 2H), 7.37 (d,  $J$  = 7.6 Hz, 1H), 4.03 (s, 2H); <sup>13</sup>C NMR (150 MHz, CDCl<sub>3</sub>, ppm)  $\delta$  185.6, 146.5, 138.2, 131.9, 128.1, 127.7, 126.7, 126.3, 112.8, 28.4; HRMS (ESI) calcd for C<sub>15</sub>H<sub>11</sub>NNaO [M + Na<sup>+</sup>], 244.0733; found: 244.0732.

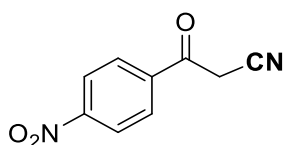

**3-(4-Nitrophenyl)-3-oxopropanenitrile (3d).**<sup>4</sup> (19 mg, 51%). Isolated by column chromatography on silica gel (petroleum ether/ethyl acetate = 3:1,  $R_f$  = 0.4); <sup>1</sup>H NMR (600 MHz, CDCl<sub>3</sub>, ppm)  $\delta$  8.38 (d,  $J$  = 8.8 Hz, 2H), 8.12 (t,  $J$  = 8.8 Hz, 2H), 4.15 (s, 2H); <sup>13</sup>C NMR (150 MHz, CDCl<sub>3</sub>, ppm)  $\delta$  185.9, 151.2, 138.4, 129.6, 124.4, 112.8, 29.9; HRMS (ESI) calcd for C<sub>9</sub>H<sub>6</sub>N<sub>2</sub>NaO<sub>3</sub> [M + Na<sup>+</sup>], 213.0270; found: 213.0268.

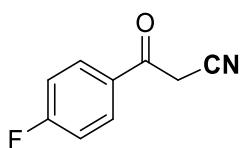

**3-(4-Fluorophenyl)-3-oxopropanenitrile (3e).**<sup>4</sup> (30 mg, 91%). Isolated by column chromatography on silica gel (petroleum ether/ethyl acetate = 3:1,  $R_f$  = 0.5); <sup>1</sup>H NMR (600 MHz, CDCl<sub>3</sub>, ppm)  $\delta$  7.98-

7.96 (m, 2H), 7.21 (t,  $J = 8.4$  Hz, 2H), 4.09 (s, 2H);  $^{13}\text{C}$  NMR (150 MHz,  $\text{CDCl}_3$ , ppm)  $\delta$  185.7, 166.2 (d,  $J_{\text{C-F}} = 258.2\text{Hz}$ ), 131.3 (d,  $J_{\text{C-F}} = 9.8\text{Hz}$ ), 130.7 (d,  $J_{\text{C-F}} = 3.2\text{Hz}$ ), 116.5 (d,  $J_{\text{C-F}} = 22.0\text{Hz}$ ), 113.7, 29.4;  $^{19}\text{F}$  NMR (565 MHz,  $\text{CDCl}_3$ , ppm)  $\delta$  -101.6 (s, 1F); HRMS (ESI) calcd for  $\text{C}_9\text{H}_6\text{FNNaO}$  [ $\text{M} + \text{Na}^+$ ], 186.0325; found: 186.0324.

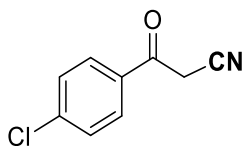

**3-(4-Chlorophenyl)-3-oxopropanenitrile (3f).**<sup>4</sup> (29 mg, 82%). Isolated by column chromatography on silica gel (petroleum ether/ethyl acetate = 3:1,  $R_f = 0.5$ );  $^1\text{H}$  NMR (600 MHz,  $\text{CDCl}_3$ , ppm)  $\delta$  7.87 (d,  $J = 8.4$  Hz, 2H), 7.51 (d,  $J = 8.6$  Hz, 2H), 4.06 (s, 2H);  $^{13}\text{C}$  NMR (150 MHz,  $\text{CDCl}_3$ , ppm)  $\delta$  185.9, 141.5, 132.5, 129.8, 129.5, 113.4, 29.4; HRMS (ESI) calcd for  $\text{C}_9\text{H}_7\text{ClNO}$  [ $\text{M} + \text{H}^+$ ], 180.0210; found: 180.0210.

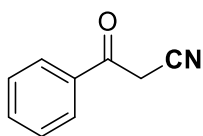

**3-Oxo-3-phenylpropanenitrile (3g).**<sup>4</sup> (28 mg, 95%). Isolated by column chromatography on silica gel (petroleum ether/ethyl acetate = 3:1,  $R_f = 0.4$ );  $^1\text{H}$  NMR (600 MHz,  $\text{CDCl}_3$ , ppm)  $\delta$  7.92 (d,  $J = 7.6$  Hz, 2H), 7.67 (t,  $J = 7.6$  Hz, 1H), 7.53 (t,  $J = 8.0$  Hz, 2H), 4.11 (s, 2H);  $^{13}\text{C}$  NMR (150 MHz,  $\text{CDCl}_3$ , ppm)  $\delta$  187.2, 134.7, 134.2, 129.1, 128.4, 113.8, 29.4; HRMS (ESI) calcd for  $\text{C}_9\text{H}_7\text{NNaO}$  [ $\text{M} + \text{Na}^+$ ], 168.0420; found: 168.0419.

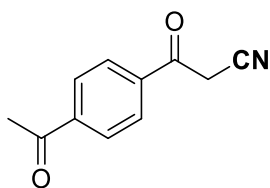

**3-(4-Acetylphenyl)-3-oxopropanenitrile (3h).**<sup>4</sup> (19 mg, 51%). Isolated by column chromatography on silica gel (petroleum ether/ethyl acetate = 3:1,  $R_f = 0.5$ );  $^1\text{H}$  NMR (600 MHz,  $\text{CDCl}_3$ , ppm)  $\delta$  8.08 (d,  $J = 8.6$  Hz, 2H), 8.01 (d,  $J = 8.6$  Hz, 2H), 4.14 (s, 2H), 2.67 (s, 3H);  $^{13}\text{C}$  NMR (150 MHz,  $\text{CDCl}_3$ , ppm)  $\delta$  197.1, 186.8, 141.3, 137.2, 128.9, 128.8, 113.4, 29.8, 27.0;  $\text{C}_{11}\text{H}_9\text{NNaO}_2$  [ $\text{M} + \text{Na}^+$ ], 210.0525; found: 210.0524.

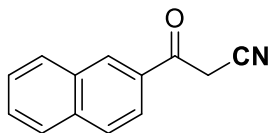

**3-(Naphthalen-2-yl)-3-oxopropanenitrile (3i).**<sup>4</sup> (36 mg, 92%). Isolated by column chromatography on silica gel (petroleum ether/ethyl acetate = 3:1,  $R_f$  = 0.5); <sup>1</sup>H NMR (600 MHz, CDCl<sub>3</sub>, ppm)  $\delta$  8.37 (s, 1H), 7.96-7.87 (m, 4H), 7.65 (t,  $J$  = 7.2 Hz, 1H), 7.59 (t,  $J$  = 7.6 Hz, 1H), 4.20 (s, 2H); <sup>13</sup>C NMR (150 MHz, CDCl<sub>3</sub>, ppm)  $\delta$  187.0, 136.0, 132.2, 131.5, 130.6, 129.7, 129.4, 129.1, 127.8, 127.3, 123.3, 114.0, 29.4; HRMS (ESI) calcd for C<sub>13</sub>H<sub>9</sub>NNaO [M + Na<sup>+</sup>], 218.0576; found: 218.0580.

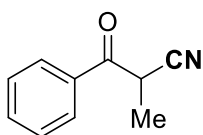

**2-Methyl-3-oxo-3-phenylpropanenitrile (3j).**<sup>5</sup> (25 mg, 77%). Isolated by column chromatography on silica gel (petroleum ether/ethyl acetate = 3:1,  $R_f$  = 0.5); <sup>1</sup>H NMR (600 MHz, CDCl<sub>3</sub>, ppm)  $\delta$  7.99 (d,  $J$  = 7.6 Hz, 2H), 7.66 (t,  $J$  = 7.8 Hz, 1H), 7.53 (d,  $J$  = 8.0 Hz, 2H), 4.40 (m, 1H), 1.65 (d,  $J$  = 7.2 Hz, 3H); <sup>13</sup>C NMR (150 MHz, CDCl<sub>3</sub>, ppm)  $\delta$  190.7, 134.5, 133.7, 129.1, 128.8, 118.1, 33.7, 14.9; HRMS (ESI) calcd for C<sub>10</sub>H<sub>10</sub>NO [M + H<sup>+</sup>], 160.0756; found: 160.0756.

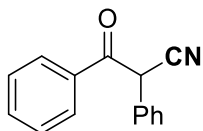

**3-Oxo-2,3-diphenylpropanenitrile (3k).**<sup>5</sup> (18 mg, 40%). Isolated by column chromatography on silica gel (petroleum ether/ethyl acetate = 3:1,  $R_f$  = 0.5); <sup>1</sup>H NMR (600 MHz, CDCl<sub>3</sub>, ppm)  $\delta$  7.95 (d,  $J$  = 7.4 Hz, 2H), 7.60 (d,  $J$  = 7.4 Hz, 1H), 7.48-7.44 (m, 4H), 7.40 (t,  $J$  = 7.2 Hz, 2H), 7.2 (m, 1H), 5.60 (s, 1H); <sup>13</sup>C NMR (150 MHz, CDCl<sub>3</sub>, ppm)  $\delta$  188.9, 134.4, 133.6, 130.4, 129.7, 129.3, 129.2, 129.0, 128.3, 116.5, 46.7; HRMS (ESI) calcd for C<sub>15</sub>H<sub>11</sub>NNaO [M + Na<sup>+</sup>], 244.0733; found: 244.0730.

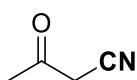

**3-Oxobutanenitrile (3l).**<sup>6</sup> (7 mg, 41%). Isolated by column chromatography on silica gel (petroleum ether/ethyl acetate = 3:1,  $R_f$  = 0.5); <sup>1</sup>H NMR (600 MHz, CDCl<sub>3</sub>, ppm)  $\delta$  3.54 (s, 2H), 2.35 (s, 3H); <sup>13</sup>C NMR (150 MHz, CDCl<sub>3</sub>, ppm)  $\delta$  195.4, 113.9, 32.8, 29.3; HRMS (ESI) calcd for C<sub>4</sub>H<sub>5</sub>NNaO [M + Na<sup>+</sup>], 106.0263; found: 106.0265.



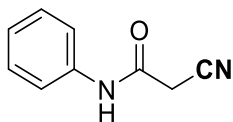

**2-Cyano-*N*-phenylacetamide (3m).**<sup>7</sup> (30 mg, 92%). Isolated by column chromatography on silica gel (petroleum ether/ethyl acetate = 2:1,  $R_f$  = 0.4); <sup>1</sup>H NMR (600 MHz, DMSO-*d*<sup>6</sup>, ppm)  $\delta$  10.30 (s, 1H), 7.54 (d,  $J$  = 8.4 Hz, 2H), 7.34 (t,  $J$  = 7.8 Hz, 2H), 7.10 (t,  $J$  = 8.0 Hz, 1H), 3.39 (s, 2H); <sup>13</sup>C NMR (150 MHz, DMSO-*d*<sup>6</sup>, ppm)  $\delta$  166.2, 143.6, 134.2, 129.2, 124.5, 121.1, 31.9; HRMS (ESI) calcd for C<sub>9</sub>H<sub>8</sub>N<sub>2</sub>NaO [M + Na<sup>+</sup>], 183.0529; found: 183.0530.

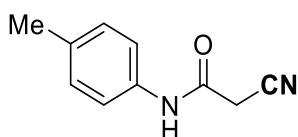

**2-Cyano-*N*-(*p*-tolyl)acetamide (3n).**<sup>8</sup> (32 mg, 93%). Isolated by column chromatography on silica gel (petroleum ether/ethyl acetate = 2:1,  $R_f$  = 0.4); <sup>1</sup>H NMR (600 MHz, DMSO-*d*<sup>6</sup>, ppm)  $\delta$  10.21 (s, 1H), 7.43 (t,  $J$  = 8.2 Hz, 2H), 7.13 (d,  $J$  = 8.0 Hz, 2H), 3.87 (s, 2H), 2.26 (s, 3H); <sup>13</sup>C NMR (150 MHz, DMSO-*d*<sup>6</sup>, ppm)  $\delta$  161.2, 136.3, 133.4, 129.7, 119.7, 116.4, 27.1, 20.9; HRMS (ESI) calcd for C<sub>10</sub>H<sub>10</sub>N<sub>2</sub>NaO [M + Na<sup>+</sup>], 197.0685; found: 197.0686.

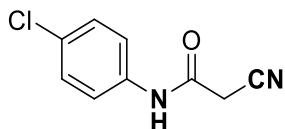

***N*-(4-Chlorophenyl)-2-cyanoacetamide (3o).**<sup>8</sup> (36 mg, 94%). Isolated by column chromatography on silica gel (petroleum ether/ethyl acetate = 2:1,  $R_f$  = 0.4); <sup>1</sup>H NMR (600 MHz, DMSO-*d*<sup>6</sup>, ppm)  $\delta$  10.43 (s, 1H), 7.57 (d,  $J$  = 8.8 Hz, 2H), 7.39 (d,  $J$  = 8.8 Hz, 2H), 3.91 (s, 2H); <sup>13</sup>C NMR (150 MHz, DMSO-*d*<sup>6</sup>, ppm)  $\delta$  161.7, 137.8, 129.3, 128.0, 121.3, 116.3, 27.2; HRMS (ESI) calcd for C<sub>9</sub>H<sub>7</sub>ClN<sub>2</sub>NaO [M + Na<sup>+</sup>], 217.0139; found: : 217.0138.

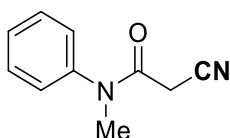

**2-Cyano-*N*-methyl-*N*-phenylacetamide (3p).**<sup>7</sup> (33 mg, 96%). Isolated by column chromatography on silica gel (petroleum ether/ethyl acetate = 2:1,  $R_f$  = 0.4); <sup>1</sup>H NMR (600 MHz, CDCl<sub>3</sub>, ppm)  $\delta$  7.49 (t,  $J$  = 7.8 Hz, 2H), 7.43 (d,  $J$  = 6.8 Hz, 1H), 7.25 (d,  $J$  = 7.4 Hz, 2H), 3.32 (s, 3H), 3.25 (s, 2H); <sup>13</sup>C NMR (150 MHz, CDCl<sub>3</sub>, ppm)  $\delta$  161.6, 142.3, 130.4, 128.9, 126.9, 114.1, 37.8, 25.3; HRMS (ESI)

calcd for C<sub>10</sub>H<sub>10</sub>N<sub>2</sub>NaO [M + Na<sup>+</sup>], 197.0685; found: 197.0685.

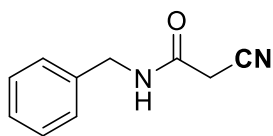

**N-Benzyl-2-cyanoacetamide (3q)**.<sup>7</sup> (33 mg, 95%). Isolated by column chromatography on silica gel (petroleum ether/ethyl acetate = 2:1, R<sub>f</sub> = 0.4); <sup>1</sup>H NMR (600 MHz, CDCl<sub>3</sub>, ppm) δ 7.36 (t, *J* = 7.2 Hz, 2H), 7.31 (d, *J* = 7.2 Hz, 1H), 7.28 (d, *J* = 7.2 Hz, 2H), 6.44 (s, 1H), 4.47 (d, *J* = 5.6 Hz, 2H), 3.39 (s, 2H); <sup>13</sup>C NMR (150 MHz, CDCl<sub>3</sub>, ppm) δ 160.7, 136.8, 129.0, 128.1, 128.0, 114.6, 44.4, 25.8; HRMS (ESI) calcd for C<sub>10</sub>H<sub>10</sub>N<sub>2</sub>NaO [M + Na<sup>+</sup>], 197.0685; found: 197.0685.

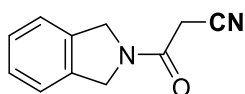

**3-(Isoindolin-2-yl)-3-oxopropanenitrile (3r)**.<sup>9</sup> (34 mg, 93%). Isolated by column chromatography on silica gel (petroleum ether/ethyl acetate = 2:1, R<sub>f</sub> = 0.4); <sup>1</sup>H NMR (600 MHz, DMSO-*d*<sup>6</sup>, ppm) δ 8.01 (d, *J* = 8.0 Hz, 1H), 7.26 (d, *J* = 7.2 Hz, 1H), 7.19 (t, *J* = 7.8 Hz, 1H), 7.05 (t, *J* = 7.2 Hz, 1H), 4.18 (s, 2H), 4.05 (t, *J* = 8.2 Hz, 2H), 3.16 (t, *J* = 8.4 Hz, 2H); <sup>13</sup>C NMR (150 MHz, DMSO-*d*<sup>6</sup>, ppm) δ 161.8, 142.7, 132.4, 127.6, 125.5, 124.5, 116.4, 116.2, 47.9, 27.8, 27.5; HRMS (ESI) calcd for C<sub>11</sub>H<sub>10</sub>N<sub>2</sub>NaO<sub>3</sub> [M + Na<sup>+</sup>], 209.0685; found: 209.0682.

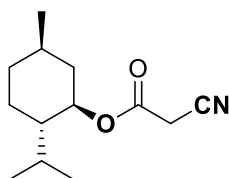

**(1*R*,2*S*,5*R*)-2-Isopropyl-5-methylcyclohexyl 2-cyanoacetate (3s)**.<sup>10</sup> (41 mg, 91%). Isolated by column chromatography on silica gel (petroleum ether/ethyl acetate = 5:1, R<sub>f</sub> = 0.5); <sup>1</sup>H NMR (600 MHz, CDCl<sub>3</sub>, ppm) δ 4.79-4.75 (m, 1H), 3.44 (d, *J* = 1.2 Hz, 2H), 2.03-2.00 (m, 1H), 1.88-1.83 (m, 1H), 1.72-1.69 (m, 2H), 1.52-1.42 (m, 2H), 1.10-1.03 (m, 2H), 0.92 (t, *J* = 6.6 Hz, 7H), 0.77 (t, *J* = 7.0 Hz, 3H); <sup>13</sup>C NMR (150 MHz, CDCl<sub>3</sub>, ppm) δ 162.5, 113.2, 77.5, 46.7, 40.5, 34.0, 31.4, 26.3, 25.0, 23.3, 21.9, 20.7, 16.2; HRMS (ESI) calcd for C<sub>13</sub>H<sub>21</sub>NNaO<sub>2</sub> [M + Na<sup>+</sup>], 246.1465; found: 246.1463.

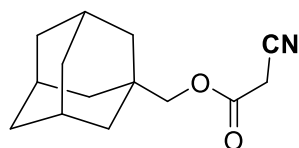

**((3*r*,5*r*,7*r*)Adamantan-1-yl)methyl 2-cyanoacetate (3t)**. (45 mg, 97%). Isolated by column

chromatography on silica gel (petroleum ether/ethyl acetate = 5:1,  $R_f$  = 0.5);  $^1\text{H}$  NMR (600 MHz,  $\text{CDCl}_3$ , ppm)  $\delta$  3.80 (s, 2H), 3.48 (s, 2H), 2.00 (s, 3H), 1.73 (d,  $J$  = 12.6 Hz, 3H), 1.65 (d,  $J$  = 12.4 Hz, 3H), 1.55 (s, 6H);  $^{13}\text{C}$  NMR (150 MHz,  $\text{CDCl}_3$ , ppm)  $\delta$  163.0, 113.0, 76.2, 38.9, 36.7, 33.2, 29.6, 27.8, 24.6; HRMS (ESI) calcd for  $\text{C}_{14}\text{H}_{20}\text{NO}_2$  [ $\text{M} + \text{H}^+$ ], 234.1489; found: 234.1476.

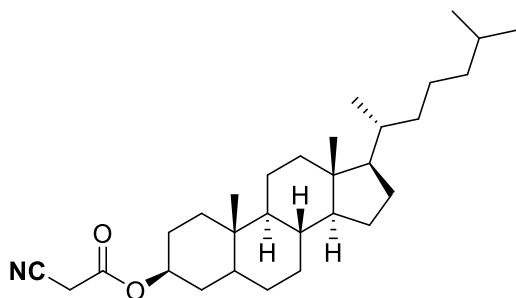

**(3*S*,8*R*,9*S*,10*S*,13*R*,14*S*,17*R*)-10,13-Dimethyl-17-(*R*)-6-methylheptan-2-yl)hexadecahydro-1*H*-cyclopenta[*a*]phenanthren-3-yl 2-cyanoacetate (3u).** (88 mg, 97%). Isolated by column chromatography on silica gel (petroleum ether/ethyl acetate = 5:1,  $R_f$  = 0.5);  $^1\text{H}$  NMR (600 MHz,  $\text{CDCl}_3$ , ppm)  $\delta$  4.81-4.76 (m, 1H), 3.42(s, 2H), 1.98-1.95(m, 1H), 1.85-1.74 (m, 3H), 1.67-1.40 (m, 8H), 1.37-1.19 (m, 9H), 1.17-0.96 (m, 10H), 0.89 (d,  $J$  = 6.6 Hz, 3H), 0.87-0.85 (m, 6H), 0.83 (s, 3H), 0.67 (s, 3H);  $^{13}\text{C}$  NMR (150 MHz,  $\text{CDCl}_3$ , ppm)  $\delta$  162.4, 113.2, 56.4, 56.3, 54.2, 44.6, 42.6, 40.0, 39.5, 36.6, 36.2, 35.8, 35.5, 35.4, 33.7, 31.9, 28.5, 28.2, 28.0, 27.2, 25.1, 24.2, 23.8, 22.8, 22.6, 21.2, 18.7, 12.2, 12.1; HRMS (ESI) calcd for  $\text{C}_{30}\text{H}_{49}\text{NNaO}_2$  [ $\text{M} + \text{Na}^+$ ], 478.3656; found: 478.3655.

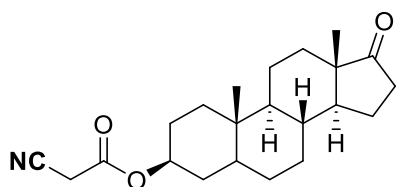

**(3*S*,8*R*,9*S*,10*S*,13*S*,14*S*)-10,13-Dimethyl-17-oxohexadecahydro-1*H*-cyclopenta[*a*]phenanthren-3-yl 2-cyanoacetate. (3v)** (69 mg, 97%). Isolated by column chromatography on silica gel (petroleum ether/ethyl acetate = 5:1,  $R_f$  = 0.5);  $^1\text{H}$  NMR (600 MHz,  $\text{CDCl}_3$ , ppm)  $\delta$  4.82-4.76 (m, 1H), 3.44(s, 2H), 2.46-2.41(m, 1H), 2.10-2.04 (m, 1H), 1.95-1.86 (m, 2H), 1.82-1.76 (m, 3H), 1.68-1.63 (m, 2H), 1.60-1.42 (m, 4H), 1.37-1.18 (m, 6H), 1.08-1.02 (m, 2H), 0.86 (s, 6H), 0.74-0.70 (m, 1H);  $^{13}\text{C}$  NMR (150 MHz,  $\text{CDCl}_3$ , ppm)  $\delta$  162.3, 113.1, 76.5, 54.1, 51.2, 47.7, 44.5, 36.4, 35.7, 35.5, 34.9, 33.5, 31.4, 30.6, 28.1, 27.0, 25.0, 21.7, 20.4, 13.7, 12.1; HRMS (ESI) calcd for  $\text{C}_{22}\text{H}_{31}\text{NNaO}_3$  [ $\text{M} + \text{Na}^+$ ], 380.2196; found: 380.2192.

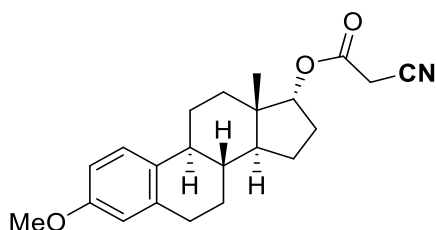

**(8*R*,9*S*,13*S*,14*S*,17*R*)-3-Methoxy-13-methyl-7,8,9,11,12,13,14,15,16,17-decahydro-6*H*-cyclopenta[*a*]phenanthren-17-yl 2-cyanoacetate (3w).** (68 mg, 96%). Isolated by column chromatography on silica gel (petroleum ether/ethyl acetate = 5:1,  $R_f$  = 0.5);  $^1\text{H}$  NMR (600 MHz,  $\text{CDCl}_3$ , ppm)  $\delta$  7.19 (d,  $J$  = 8.4 Hz, 1H), 6.73-6.70 (m, 1H), 6.63 (s, 1H), 4.77 (t,  $J$  = 8.6 Hz, 1H), 3.78 (s, 3H), 3.46 (s, 2H), 2.88-2.84 (m, 2H), 2.32-2.19 (s, 3H), 1.92-1.88 (m, 2H), 1.78-1.76 (m, 1H), 1.64-1.60 (m, 2H), 1.44-1.18 (m, 5H), 0.80 (s, 3H);  $^{13}\text{C}$  NMR (150 MHz,  $\text{CDCl}_3$ , ppm)  $\delta$  162.9, 157.5, 137.8, 132.2, 126.4, 113.9, 113.1, 111.5, 85.5, 55.2, 49.6, 43.7, 43.2, 38.5, 36.8, 29.7, 27.4, 27.2, 26.1, 24.9, 23.2, 12.0; HRMS (ESI) calcd for  $\text{C}_{22}\text{H}_{27}\text{NNaO}_3$  [ $\text{M} + \text{Na}^+$ ], 376.1883; found: 376.1867.

#### 4. Synthesis and characterization for the products 4-6.

**Method D:** For synthesis of **4**.<sup>11</sup>

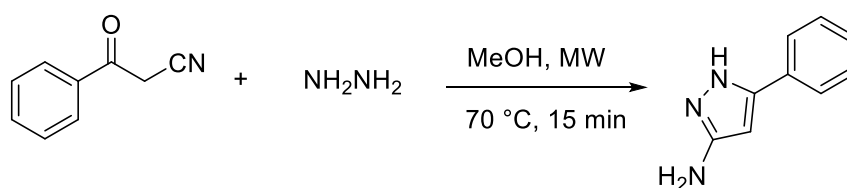

5-Phenyl-1*H*-pyrazol-3-amine **4** were synthesized according to the reported literature. Benzoyl acetonitrile (2.0 mmol, 1.0 equiv), hydrazine (2.6 mmol, 1.3 equiv), MeOH (1.0 mL) were heated under microwave conditions (100 W, 70 °C) for 15 min. After the reaction was completed (monitored by TLC), the reaction mixture was concentrated under vacuum. The residue was purified by chromatography on silica gel to give the product **4**.

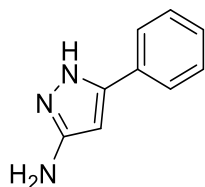

**5-Phenyl-1*H*-pyrazol-3-amine (4).**<sup>11</sup> (30 mg, 94%). Isolated by column chromatography on silica gel (petroleum ether/ethyl acetate = 5:1,  $R_f$  = 0.6);  $^1\text{H}$  NMR (600 MHz,  $\text{DMSO-}d_6$ , ppm)  $\delta$  7.67 (d,  $J$  = 7.6 Hz, 2H), 7.37 (t,  $J$  = 7.4 Hz, 2H), 7.26 (t,  $J$  = 7.2 Hz, 1H), 5.79 (s, 1H);  $^{13}\text{C}$  NMR (150 MHz,  $\text{DMSO-}d_6$ , ppm)  $\delta$  153.6, 145.9, 132.5, 129.1, 127.7, 125.2, 87.8; HRMS (ESI) calcd for  $\text{C}_9\text{H}_{10}\text{N}_3$  [ $\text{M} + \text{H}^+$ ],

160.0869; found: 160.0886.

**Method E:** For synthesis of **5**.<sup>12</sup>

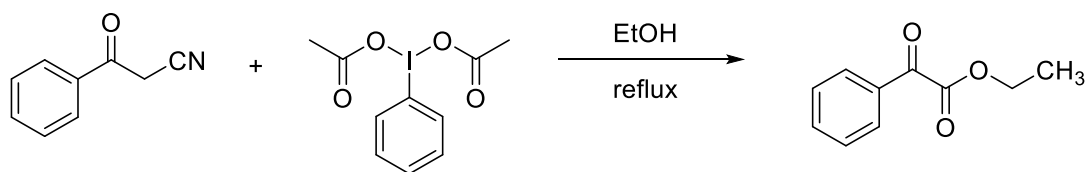

Methyl 2-oxo-2-phenylacetate **5** were synthesized according to the reported literature. Benzoyl acetonitrile (1.0 mmol) and PIDA (2.2 mmol) were dissolved in EtOH (8.0 mL) and stirred under refluxing for 1 h. After the reaction was completed (monitored by TLC), the reaction mixture was concentrated under vacuum. The residue was purified by chromatography on silica gel (20:1 petroleum ether/EtOAc) to give the product **5**.

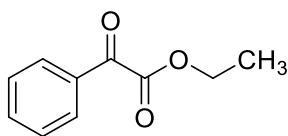

**Methyl 2-oxo-2-phenylacetate (5)**.<sup>12</sup> (30 mg, 86%). Isolated by column chromatography on silica gel (petroleum ether/ethyl acetate = 10:1,  $R_f = 0.5$ ); <sup>1</sup>H NMR (600 MHz, CDCl<sub>3</sub>, ppm)  $\delta$  8.01 (t,  $J = 7.4$  Hz, 2H), 7.65 (t,  $J = 7.2$  Hz, 1H), 7.51 (t,  $J = 8.0$  Hz, 2H), 4.47-4.43 (m, 2H), 1.41 (t,  $J = 7.2$  Hz, 3H); <sup>13</sup>C NMR (150 MHz, CDCl<sub>3</sub>, ppm)  $\delta$  186.5, 163.9, 134.9, 132.5, 130.0, 128.9, 62.3, 14.1; HRMS (ESI) calcd for C<sub>10</sub>H<sub>10</sub>NaO<sub>3</sub> [M + Na<sup>+</sup>], 201.0522; found: 201.0521.

**Method F:** For synthesis of **6**.<sup>13</sup>

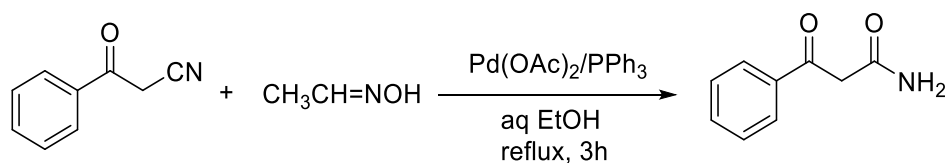

3-Oxo-3-phenylpropanamide **6** were synthesized according to the reported literature. Benzoyl acetonitrile (1.0 mmol), acetaldoxime (2.0 mmol), Pd(OAc)<sub>2</sub>, (10 mol %) and PPh<sub>3</sub> (20 mol %) were dissolved in H<sub>2</sub>O/EtOH (1:4), and stirred under refluxing for 3 h. After the reaction was completed (monitored by TLC), the reaction mixture was concentrated under vacuum. The residue was purified by chromatography on silica gel to give the product **6**.

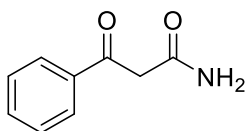

**3-Oxo-3-phenylpropanamide (6)**<sup>13</sup> (25 mg, 77%). Isolated by column chromatography on silica gel (petroleum ether/ethyl acetate = 1:1,  $R_f$  = 0.3); <sup>1</sup>H NMR (600 MHz, CDCl<sub>3</sub>, ppm)  $\delta$  7.99 (d,  $J$  = 7.6 Hz, 2H), 7.63 (t,  $J$  = 7.2 Hz, 1H), 7.50 (t,  $J$  = 7.8 Hz, 2H), 3.98 (s, 2H); <sup>13</sup>C NMR (150 MHz, CDCl<sub>3</sub>, ppm)  $\delta$  195.7, 168.1, 136.1, 134.2, 128.9, 128.6, 45.1; HRMS (ESI) calcd for C<sub>9</sub>H<sub>10</sub>NO<sub>2</sub> [M + H<sup>+</sup>], 164.0706; found: 164.0702.

## 5. References

- (a) Q. Lu, C. Liu, Z. Huang, Y. Ma, J. Zhang and A. Lei, Relay cooperation of K<sub>2</sub>S<sub>2</sub>O<sub>8</sub> and O<sub>2</sub> in oxytrifluoromethylation of alkenes using CF<sub>3</sub>SO<sub>2</sub>Na. *Chem. Commun.*, 2014, **50**, 14101-14104. (b) Y. Lu, Y. Li, R. Zhang, K. Jin and C. Duan, Highly efficient Cu(I)-catalyzed trifluoromethylation of aryl(heteroaryl) enol acetates with CF<sub>3</sub> radicals derived from CF<sub>3</sub>SO<sub>2</sub>Na and TBHP at room temperature. *J. Fluor. Chem.*, 2014, **161**, 128-133. (c) A. Deb, S. Manna, A. Modak, T. Patra, S. Maity and D. Maiti, Oxidative trifluoromethylation of unactivated olefins: an efficient and practical synthesis of alpha-trifluoromethyl-substituted ketones. *Angew. Chem. Int. Ed.*, 2013, **52**, 9747-9750. (d) R. Tomita, Y. Yasu, T. Koike and M. Akita, Combining photoredox-catalyzed trifluoromethylation and oxidation with DMSO: facile synthesis of alpha-trifluoromethylated ketones from aromatic alkenes. *Angew. Chem. Int. Ed.*, 2014, **53**, 7144-7148.
- X. Du, W. M. Zhang, X. G. Zhang and H. Y. Tu, Palladium-Catalyzed Selective C-F Bond Cleavage of Trifluoropropanamides Leading to (Z)-N- $\alpha$ -Fluorovinylindoles. *Adv. Synth. Catal.*, 2022, **364**, 2546-2550.
- A. Joliton, J. M. Plancher and E. M. Carreira, Formation of alpha-SF<sub>5</sub>-Enolate Enables Preparation of 3-SF<sub>5</sub>-Quinolin-2-ones, 3-SF<sub>5</sub>-Quinolines, and 3-SF<sub>5</sub>-Pyridin-2-ones: Evaluation of their Physicochemical Properties. *Angew. Chem. Int. Ed.*, 2016, **55**, 2113-2117.
- J. Shen, D. Yang, Y. Liu, S. Qin, J. Zhang, J. Sun, C. Liu, C. Liu, X. Zhao, C. Chu and R. Liu, Copper-Catalyzed Aerobic Oxidative Coupling of Aromatic Alcohols and Acetonitrile to  $\beta$ -Ketonitriles. *Org. Lett.*, 2014, **16**, 350-353.
- F. Wang, T. Yang, T. Wu, L.-S. Zheng, C. Yin, Y. Shi, X.-Y. Ye, G.-Q. Chen and X. Zhang, Asymmetric Transfer Hydrogenation of  $\alpha$ -Substituted- $\beta$ -Keto Carbonitriles via Dynamic Kinetic Resolution. *J. Am. Chem. Soc.*, 2021, **143**, 2477-2483.
- R. R. Sauers and S. D. Van Arnum, A convenient preparation of 3-acetyl-5-methylisoxazole. *J. Heterocyclic Chem.*, 2003, **40**, 655-658.

- 7 N. Y. Gorobets, B. H. Yousefi, F. Belaj and C. O. Kappe, Rapid microwave-assisted solution phase synthesis of substituted 2-pyridone libraries. *Tetrahedron*, 2004, **60**, 8633-8644.
- 8 E. C. Truong, P. W. Phuan, A. L. Reggi, L. Ferrera, L. J. V. Galiotta, S. E. Levy, A. C. Moises, O. Cil, E. Diez-Cecilia, S. Lee, A. S. Verkman and M. O. Anderson, Substituted 2-Acylaminocycloalkylthiophene-3-carboxylic Acid Arylamides as Inhibitors of the Calcium-Activated Chloride Channel Transmembrane Protein 16A (TMEM16A). *J. Med. Chem.*, 2017, **60**, 4626-4635.
- 9 T. Zhou, Y. Wang, B. Li and B. Wang, Rh(III)-Catalyzed Carbocyclization of 3-(Indolin-1-yl)-3-oxopropanenitriles with Alkynes and Alkenes through C-H Activation. *Org. Lett.*, 2016, **18**, 5066-5069.
- 10 P. Krasik, Synthesis of sterically hindered esters via titanium catalyzed transesterification. *Tetrahedron Lett.*, 1998, **39**, 4223-4226.
- 11 M. Kelada, J. M. D. Walsh, R. W. Devine, P. McArdle and J. C. Stephens, Synthesis of pyrazolopyrimidinones using a "one-pot" approach under microwave irradiation. *Beilstein J. Org. Chem.*, 2018, **14**, 1222-1228.
- 12 Y. Xie, J. Liu, Y. Huang and L. Yao, A novel method for synthesis of  $\alpha$ -keto esters with phenyliodine(III) diacetate. *Tetrahedron Lett.*, 2015, **56**, 3793-3795.
- 13 E. S Kim, H. S. Kim and J. N. Kim, An efficient Pd-catalyzed hydration of nitrile with acetaldoxime. *Tetrahedron Lett.*, 2009, **50**, 2973-2975.

## 6. Copies of $^1\text{H}$ NMR and $^{13}\text{C}$ NMR spectra for all compounds.

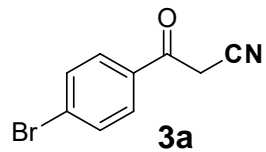

7.798  
7.784  
7.690  
7.675

4.053

```

NAME      GG-508P-20220505
EXPNO     1
PROCNO    1
Date_     20220506
Time      5.38
INSTRUM   spect
PROBHD    5 mm PABBO BB/
PULPROG   zg30
TD        65536
SOLVENT   CDCl3
NS        8
DS        0
SWH       9615.385 Hz
FIDRES    0.146719 Hz
AQ        3.4079220 sec
RG        109.27
DW        52.000 usec
DE        6.50 usec
TE        298.0 K
D1        1.00000000 sec
TD0       1
  
```

```

===== CHANNEL f1 =====
SFO1     600.1739011 MHz
NUC1     1H
P1       9.96 usec
SI       65536
SF       600.1700124 MHz
WDW      EM
SSB      0
LB       0.30 Hz
GB       0
PC       1.00
  
```

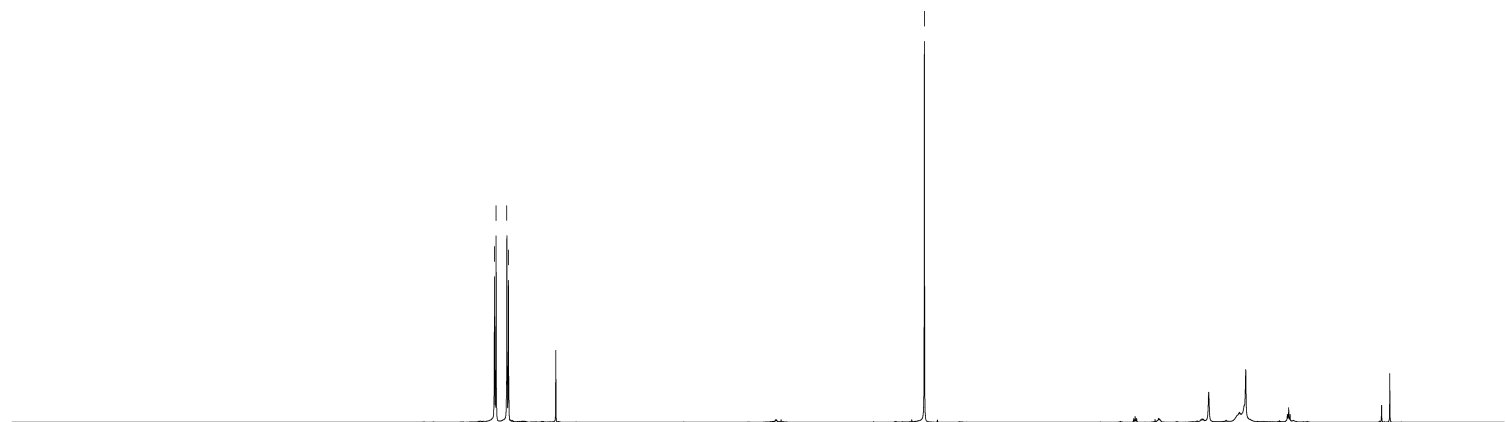

11 10 9 8 7 6 5 4 3 2 1 0 ppm

2.00  
2.01

2.04



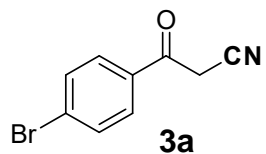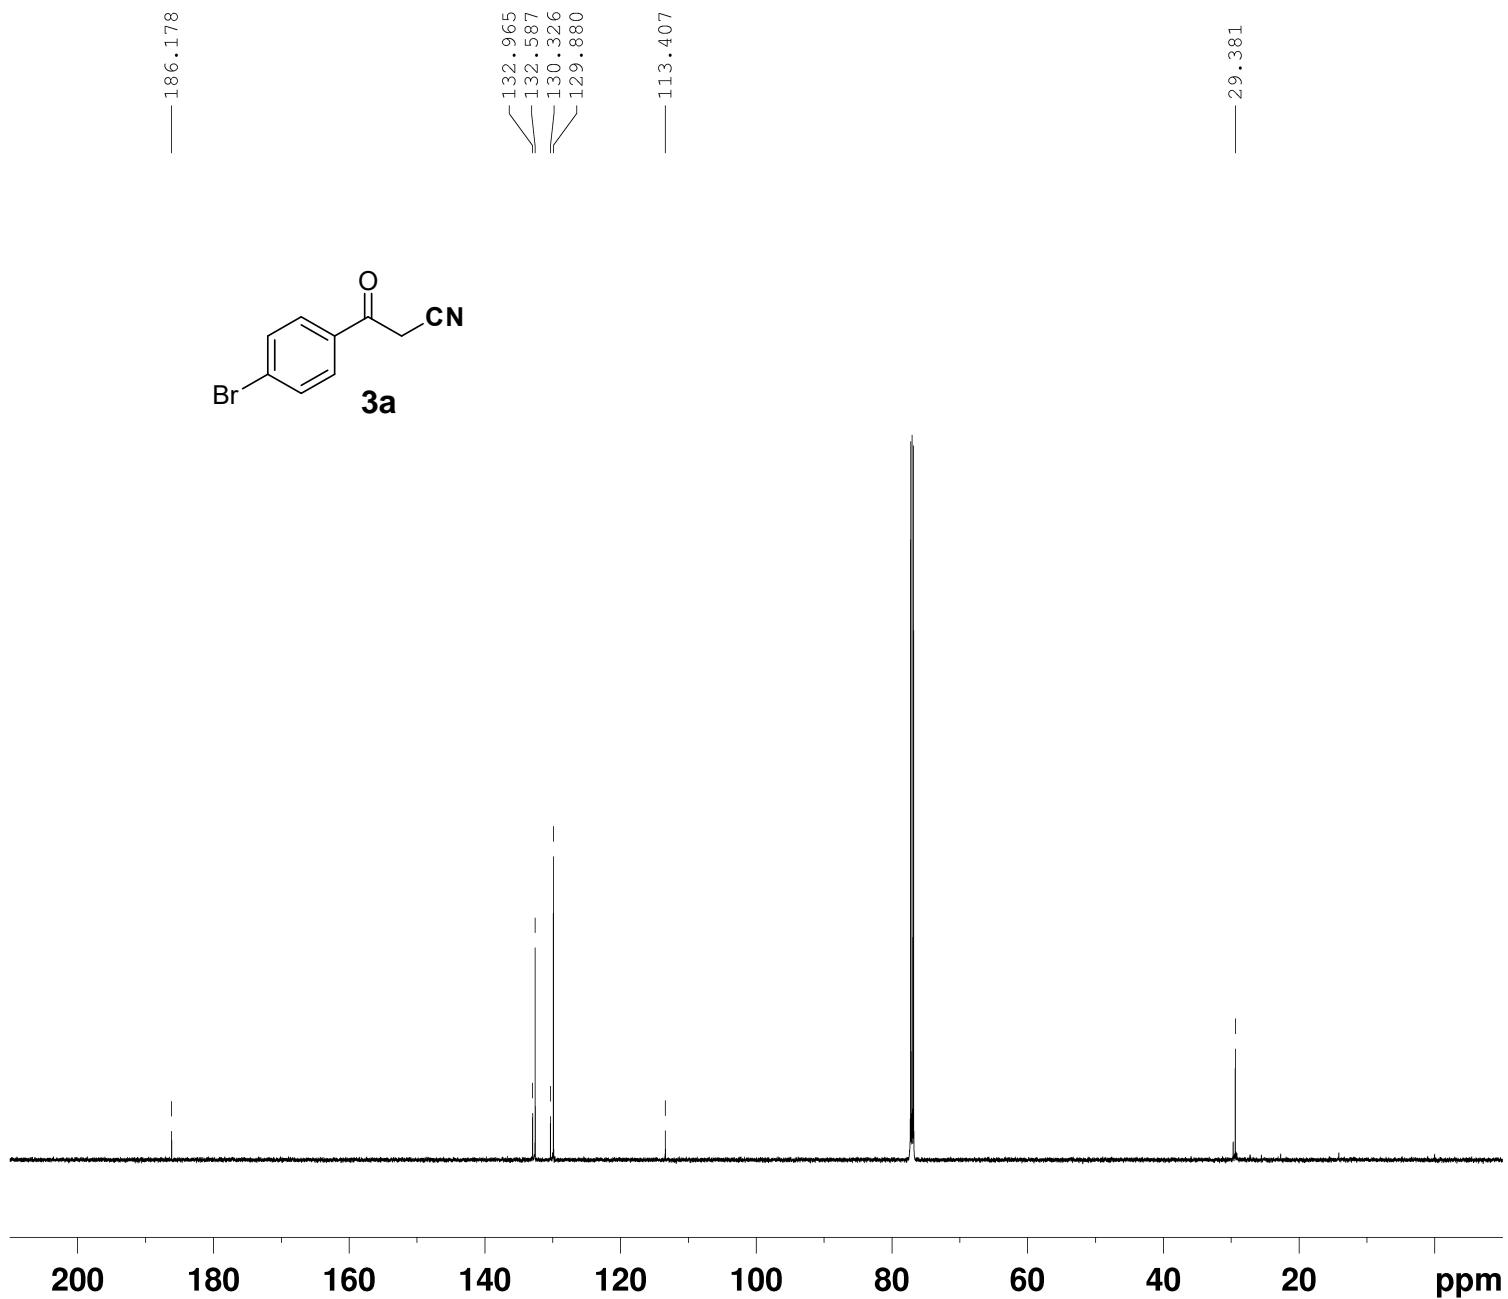

NAME GG-508P-20220505  
EXPNO 2  
PROCNO 1  
Date\_ 20220506  
Time 6.30  
INSTRUM spect  
PROBHD 5 mm PABBO BB/  
PULPROG zgpg30  
TD 65536  
SOLVENT CDC13  
NS 1024  
DS 4  
SWH 36057.691 Hz  
FIDRES 0.550197 Hz  
AQ 0.9088159 sec  
RG 190.02  
DW 13.867 usec  
DE 6.50 usec  
TE 298.0 K  
D1 2.00000000 sec  
D11 0.03000000 sec  
TD0 1

==== CHANNEL f1 =====  
SFO1 150.9279571 MHz  
NUC1 13C  
P1 11.90 usec  
SI 32768  
SF 150.9128665 MHz  
WDW EM  
SSB 0  
LB 1.00 Hz  
GB 0  
PC 1.40

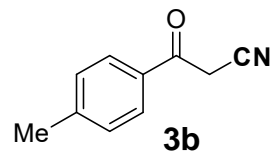

7.825  
7.811  
7.325  
7.312

4.048

2.443

```

NAME      GG-585P-20220611
EXPNO     1
PROCNO    1
Date_     20220611
Time      11.47
INSTRUM   spect
PROBHD    5 mm PABBO BB/
PULPROG   zg30
TD         65536
SOLVENT   CDC13
NS         8
DS         0
SWH        9615.385 Hz
FIDRES     0.146719 Hz
AQ         3.4079220 sec
RG         87.54
DW         52.000 usec
DE         6.50 usec
TE         298.0 K
D1         1.00000000 sec
TD0        1
  
```

```

===== CHANNEL f1 =====
SFO1      600.1739011 MHz
NUC1       1H
P1         9.96 usec
SI         65536
SF         600.1700130 MHz
WDW        EM
SSB        0
LB         0.30 Hz
GB         0
PC         1.00
  
```

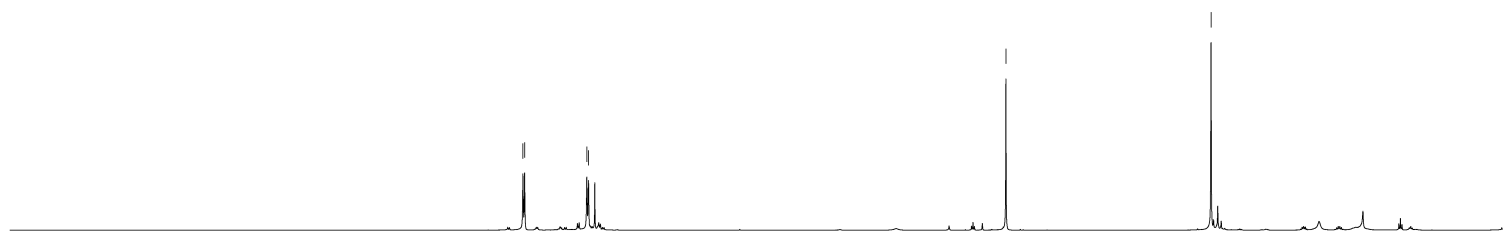

11 10 9 8 7 6 5 4 3 2 1 ppm

2.00

1.96

2.02

3.11

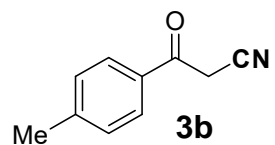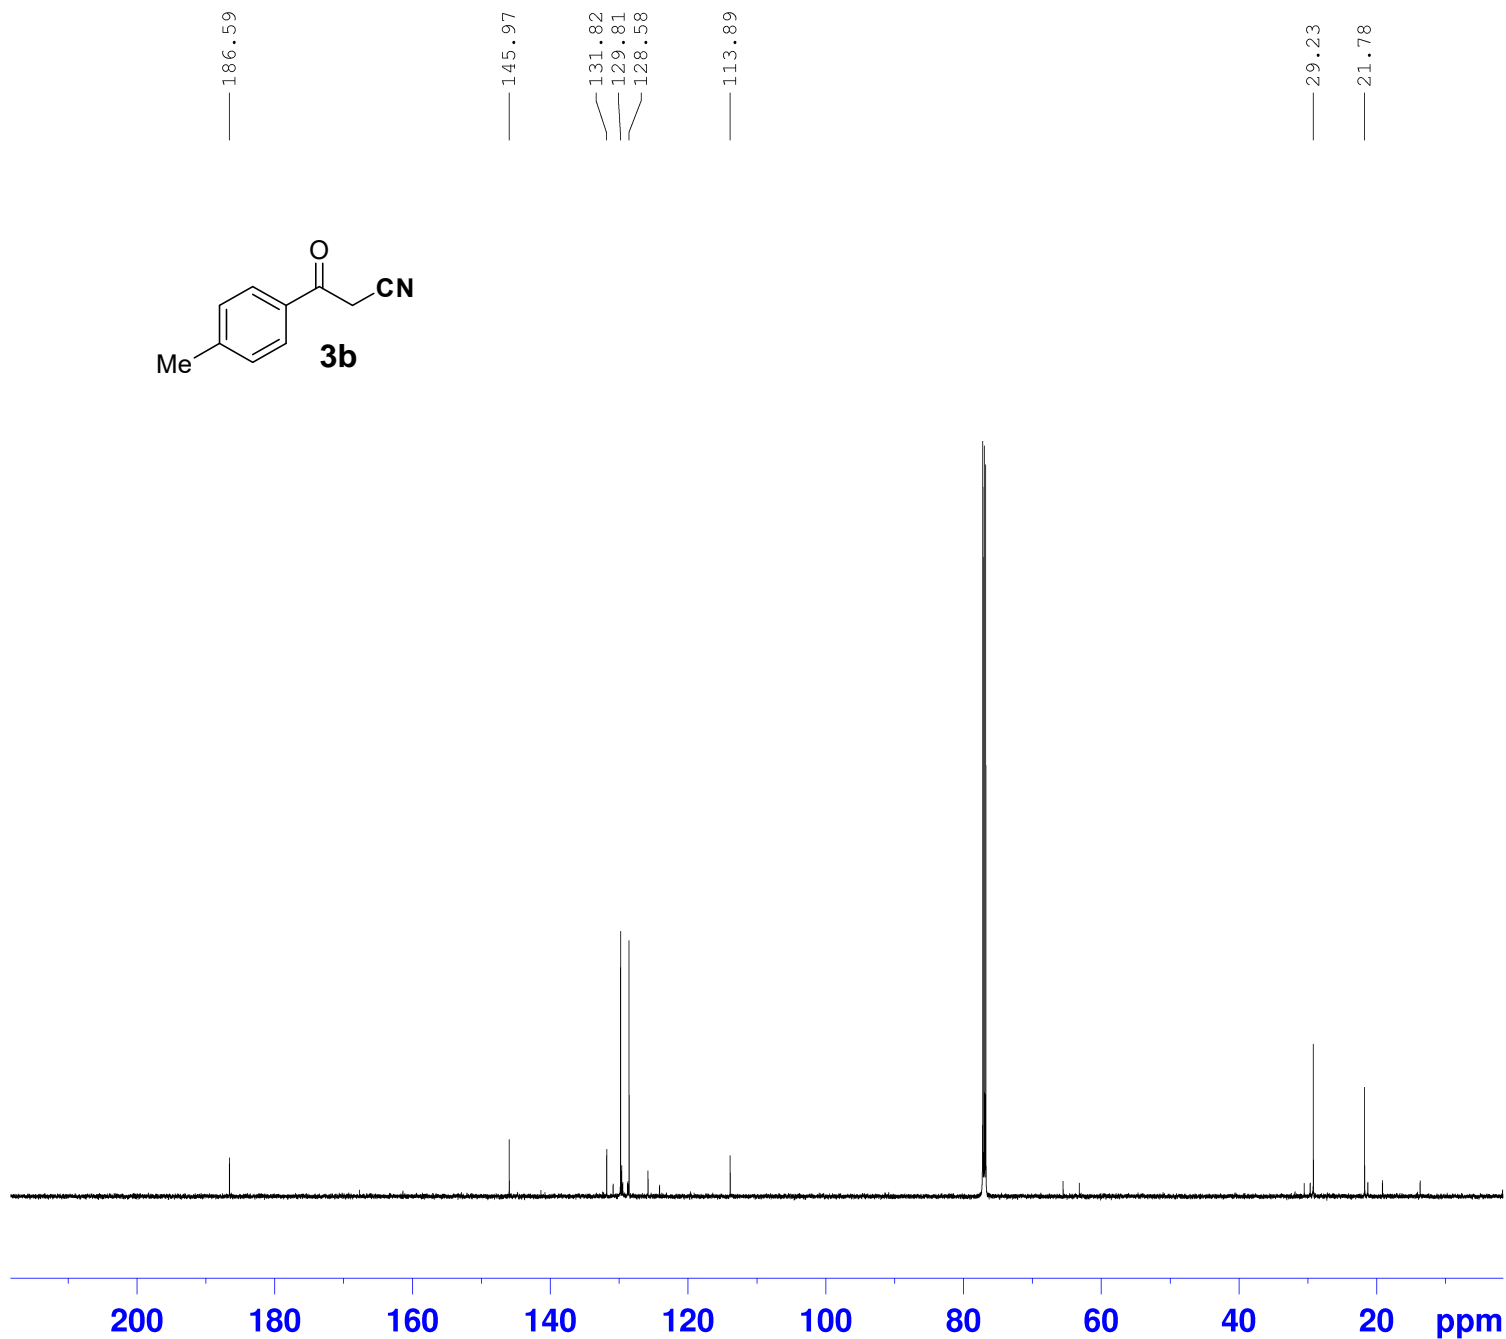

```

NAME      GG-585P-20220611
EXPNO     2
PROCNO    1
Date_     20220611
Time      12.39
INSTRUM   spect
PROBHD    5 mm PABBO BB/
PULPROG   zgpg30
TD         65536
SOLVENT   CDC13
NS         1024
DS         4
SWH        36057.691 Hz
FIDRES     0.550197 Hz
AQ         0.9088159 sec
RG         190.02
DW         13.867 usec
DE         6.50 usec
TE         298.0 K
D1         2.00000000 sec
D11        0.03000000 sec
TDO        1
  
```

```

===== CHANNEL f1 =====
SF01      150.9279571 MHz
NUC1       13C
P1         11.90 usec
SI         32768
SF         150.9128718 MHz
WDW        EM
SSB        0
LB         1.00 Hz
GB         0
PC         1.40
  
```

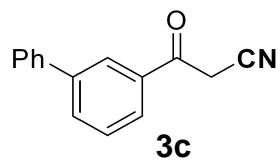

7.931  
7.917  
7.676  
7.662  
7.564  
7.552  
7.431  
7.419  
7.407  
7.374  
7.362  
7.350

4.032

```

NAME      GG-591P-20230203
EXPNO     1
PROCNO    1
Date_     20230203
Time      16.36
INSTRUM   spect
PROBHD    5 mm PABBO BB/
PULPROG   zg30
TD        65536
SOLVENT   CDCl3
NS        8
DS        0
SWH       9615.385 Hz
FIDRES    0.146719 Hz
AQ        3.4079220 sec
RG        96.28
DW        52.000 usec
DE        6.50 usec
TE        298.0 K
D1        1.00000000 sec
TD0       1
  
```

```

===== CHANNEL f1 =====
SFO1     600.1739011 MHz
NUC1     1H
P1       9.96 usec
SI       65536
SF       600.1700595 MHz
WDW      EM
SSB      0
LB       0.30 Hz
GB       0
PC       1.00
  
```

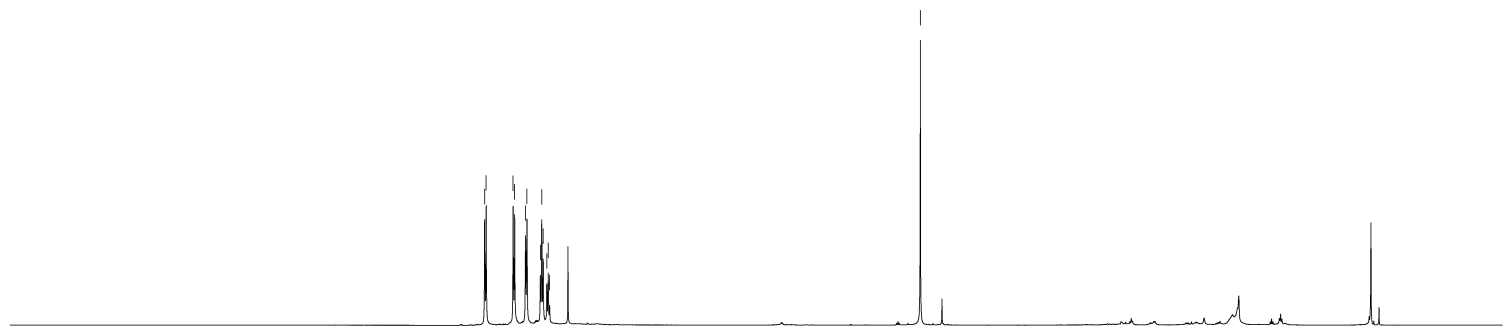

12 11 10 9 8 7 6 5 4 3 2 1 0 ppm

2.00  
2.07  
2.08  
2.06  
1.09

2.03

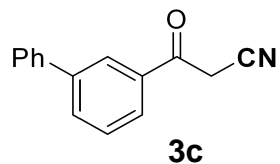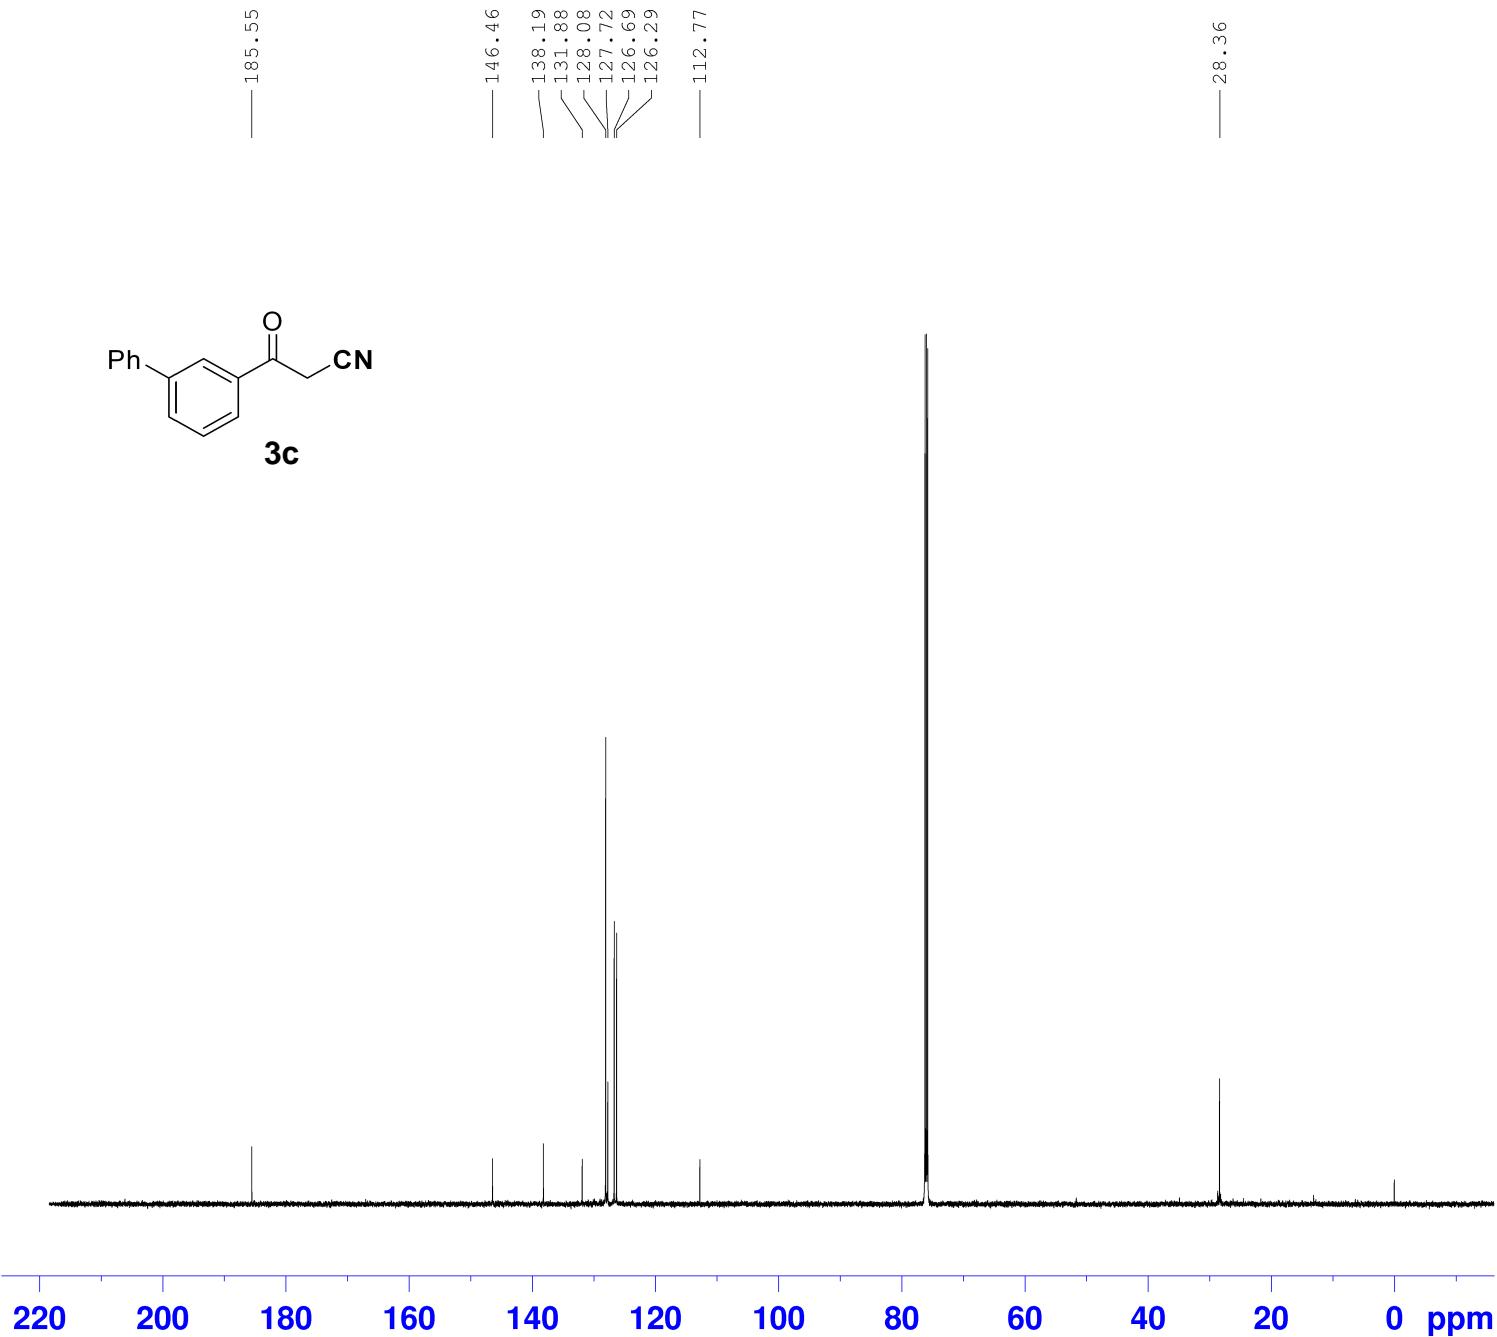

```

NAME      GG-591P-20230203
EXPNO     2
PROCNO    1
Date_     20230203
Time      17.28
INSTRUM   spect
PROBHD    5 mm PABBO BB/
PULPROG   zgpg30
TD        65536
SOLVENT   CDC13
NS        1024
DS        4
SWH       36057.691 Hz
FIDRES    0.550197 Hz
AQ        0.9088159 sec
RG        190.02
DW        13.867 usec
DE        6.50 usec
TE        298.0 K
D1        2.00000000 sec
D11       0.03000000 sec
TD0       1
  
```

```

===== CHANNEL f1 =====
SFO1     150.9279571 MHz
NUC1     13C
P1       11.90 usec
SI       32768
SF       150.9130239 MHz
WDW      EM
SSB      0
LB       1.00 Hz
GB       0
PC       1.40
  
```

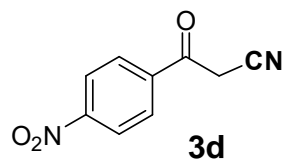

8.329  
8.314  
8.127  
8.113

2.690

```

NAME      GG-694-1P-20221029
EXPNO     1
PROCNO    1
Date_     20221030
Time      4.07
INSTRUM   spect
PROBHD    5 mm PABBO BB/
PULPROG   zg30
TD         65536
SOLVENT   CDC13
NS         8
DS         0
SWH       9615.385 Hz
FIDRES    0.146719 Hz
AQ         3.4079220 sec
RG         76.92
DW         52.000 usec
DE         6.50 usec
TE         298.0 K
D1         1.00000000 sec
TD0        1
  
```

```

===== CHANNEL f1 =====
SFO1      600.1739011 MHz
NUC1       1H
P1         9.96 usec
SI         65536
SF         600.1700064 MHz
WDW        EM
SSB        0
LB         0.30 Hz
GB         0
PC         1.00
  
```

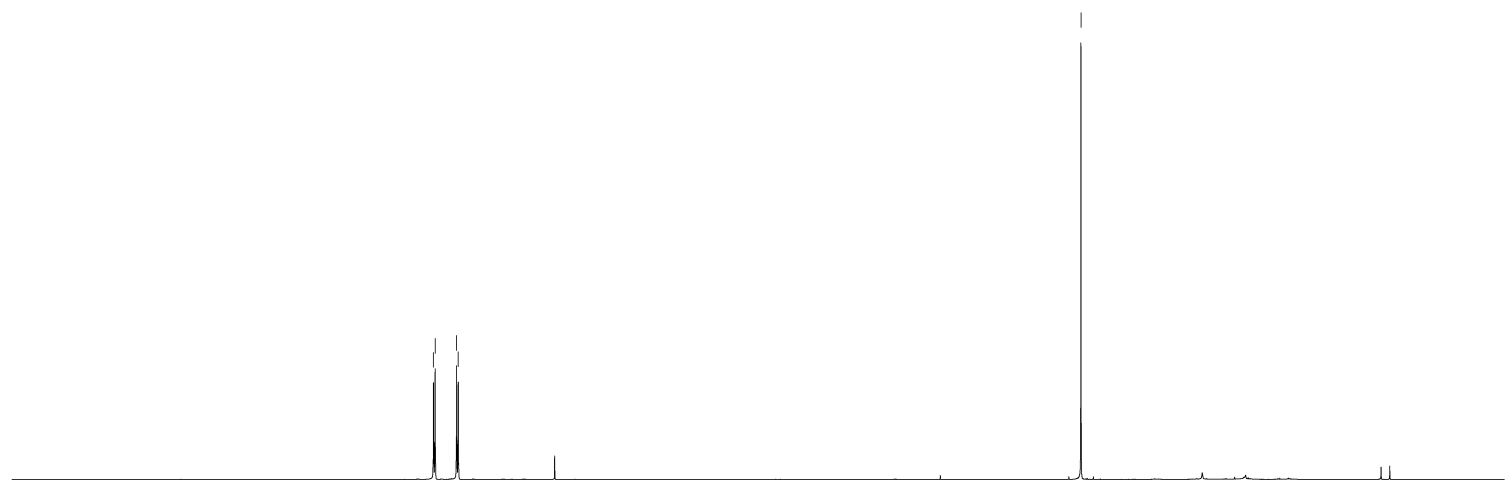

11 10 9 8 7 6 5 4 3 2 1 0 ppm

2.03  
2.00

3.07

— 196.31

— 150.38

— 141.39

— 129.32

— 123.88

— 27.00

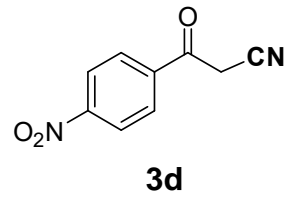

```
NAME      GG-694-1P-20221029
EXPNO     2
PROCNO    1
Date_     20221030
Time      4.59
INSTRUM   spect
PROBHD    5 mm PABBO BB/
PULPROG   zgpg30
TD         65536
SOLVENT   CDCl3
NS         1024
DS         4
SWH        36057.691 Hz
FIDRES     0.550197 Hz
AQ         0.9088159 sec
RG         190.02
DW         13.867 usec
DE         6.50 usec
TE         298.0 K
D1         2.00000000 sec
D11        0.03000000 sec
TD0        1
```

```
===== CHANNEL f1 =====
SFO1      150.9279571 MHz
NUC1       13C
P1         11.90 usec
SI         32768
SF         150.9128665 MHz
WDW        EM
SSB        0
LB         1.00 Hz
GB         0
PC         1.40
```

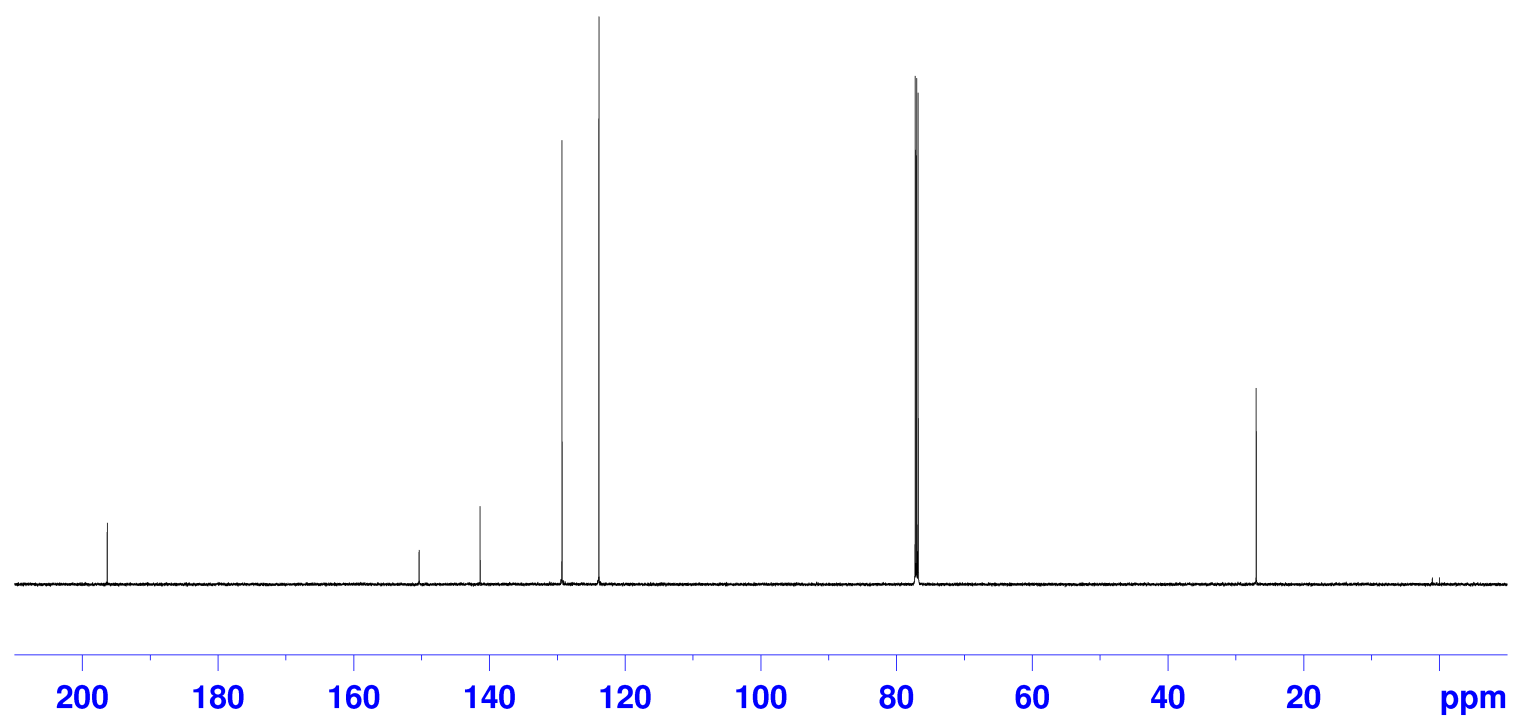

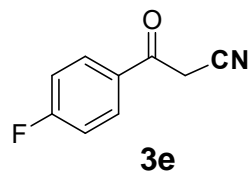

7.984  
 7.976  
 7.970  
 7.961  
 7.223  
 7.209  
 7.194

4.087

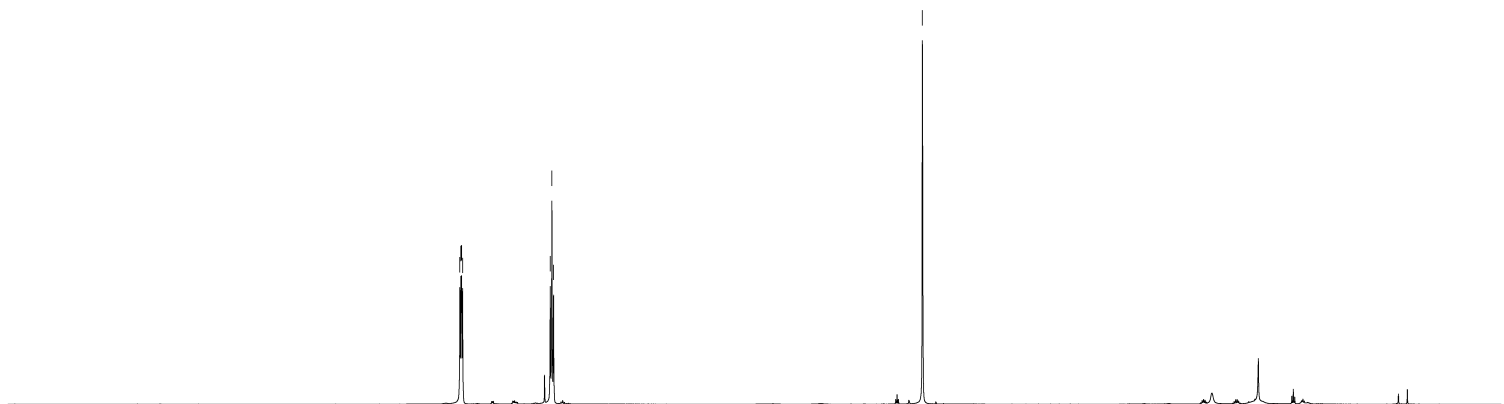

11 10 9 8 7 6 5 4 3 2 1 0 ppm

2.02

2.00

2.03

```

NAME      GG-646P-20220707
EXPNO     1
PROCNO    1
Date_     20220707
Time      12.44
INSTRUM   spect
PROBHD    5 mm PABBO BB/
PULPROG   zg30
TD        65536
SOLVENT   CDC13
NS        8
DS        0
SWH       9615.385 Hz
FIDRES    0.146719 Hz
AQ        3.4079220 sec
RG        76.92
DW        52.000 usec
DE        6.50 usec
TE        298.0 K
D1        1.00000000 sec
TD0       1
  
```

```

===== CHANNEL f1 =====
SFO1     600.1739011 MHz
NUC1     1H
P1       9.96 usec
SI       65536
SF       600.1700081 MHz
WDW      EM
SSB      0
LB       0.30 Hz
GB       0
PC       1.00
  
```



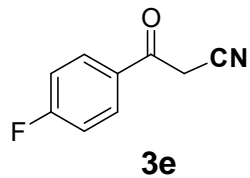

185.65

167.48  
165.77

131.36  
131.30  
130.76  
130.74

116.57  
116.42  
113.66

29.40

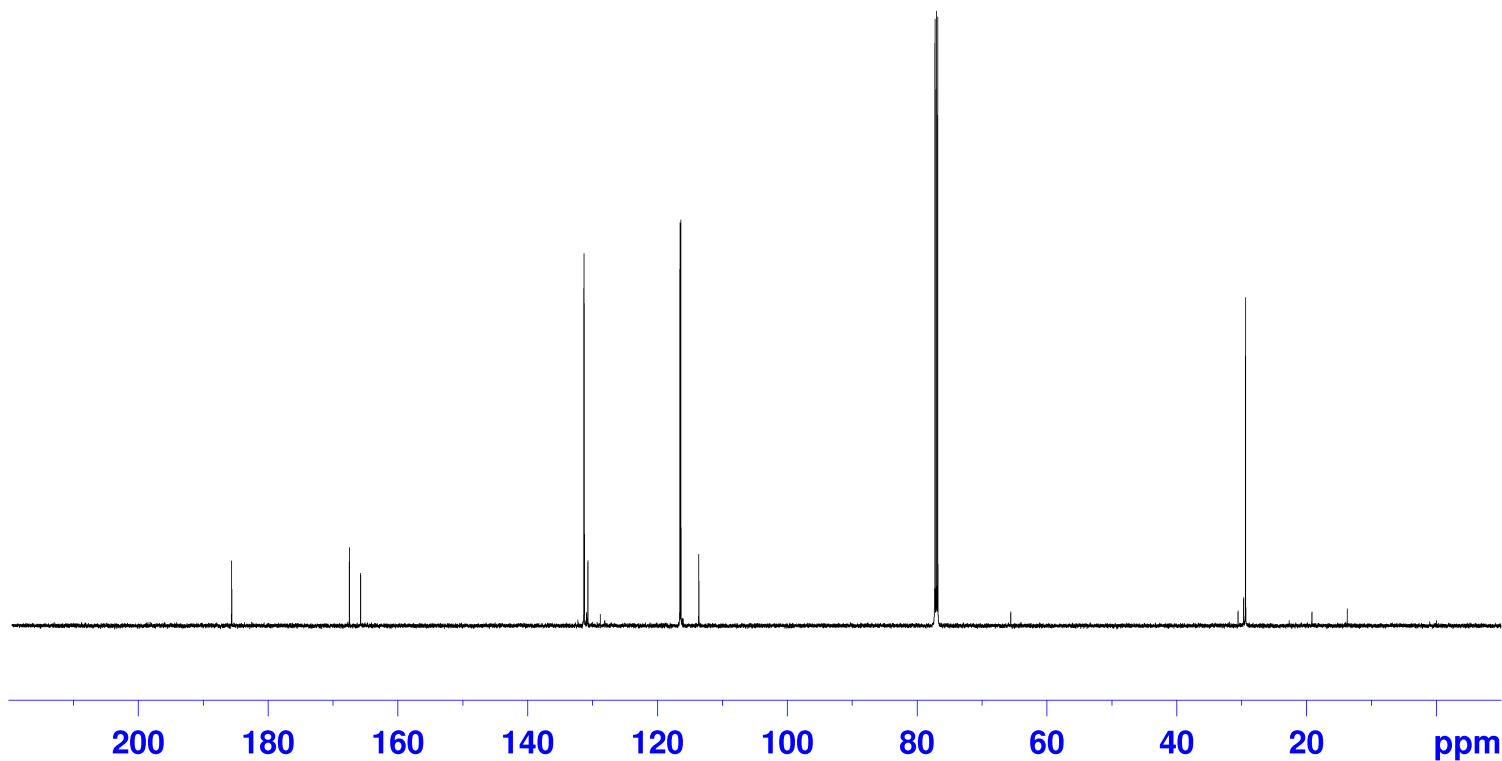

```

NAME      GG-646P-20220707
EXPNO     2
PROCNO    1
Date_     20220707
Time      13.35
INSTRUM   spect
PROBHD    5 mm PABBO BB/
PULPROG   zgpg30
TD        65536
SOLVENT   CDCl3
NS        1024
DS        4
SWH       36057.691 Hz
FIDRES    0.550197 Hz
AQ        0.9088159 sec
RG        190.02
DW        13.867 usec
DE        6.50 usec
TE        298.9 K
D1        2.0000000 sec
D11       0.0300000 sec
TD0       1
  
```

```

===== CHANNEL f1 =====
SFO1    150.9279571 MHz
NUC1     13C
P1       11.90 usec
SI       32768
SF       150.9128665 MHz
WDW      EM
SSB      0
LB       1.00 Hz
GB       0
PC       1.40
  
```

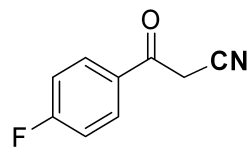

3e

-101.64

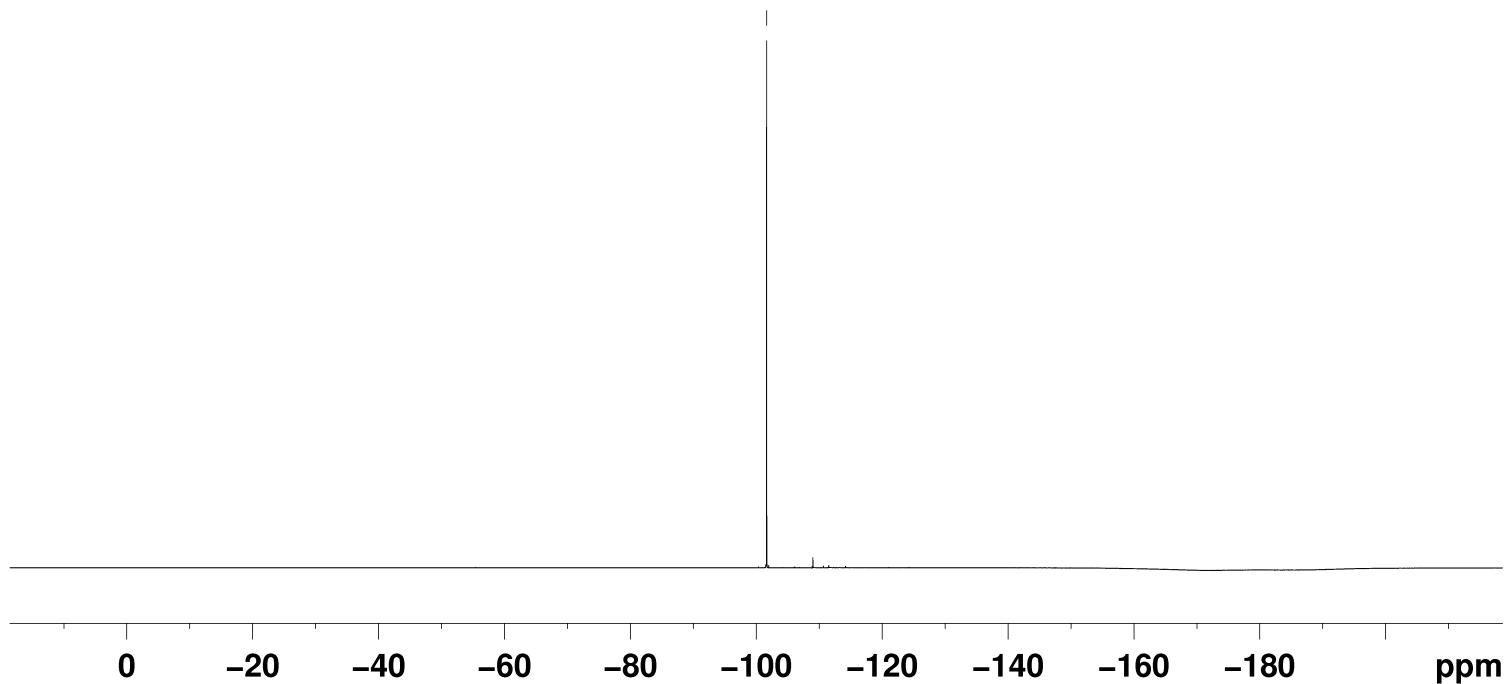

NAME GG-786P-20230206  
EXPNO 2  
PROCNO 1  
Date\_ 20230206  
Time 20.38  
INSTRUM spect  
PROBHD 5 mm PABBO BB/  
PULPROG zgflqn  
TD 131072  
SOLVENT CDCl3  
NS 16  
DS 4  
SWH 133928.578 Hz  
FIDRES 1.021794 Hz  
AQ 0.4893855 sec  
RG 190.02  
DW 3.733 usec  
DE 6.50 usec  
TE 298.0 K  
D1 1.00000000 sec  
TD0 1

==== CHANNEL f1 =====  
SFO1 564.6675534 MHz  
NUC1 19F  
P1 12.00 usec  
SI 65536  
SF 564.7240258 MHz  
WDW EM  
SSB 0  
LB 0.30 Hz  
GB 0  
PC 1.00

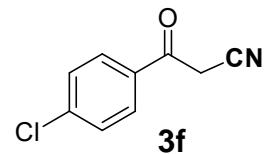

10.435

7.585  
7.570  
7.402  
7.387

3.913

```

NAME      GG-669P-20220917
EXPNO     1
PROCNO    1
Date_     20220917
Time      12.30
INSTRUM   spect
PROBHD    5 mm PABBO BB/
PULPROG   zg30
TD        65536
SOLVENT   DMSO
NS        8
DS        0
SWH       9615.385 Hz
FIDRES    0.146719 Hz
AQ        3.4079220 sec
RG        87.54
DW        52.000 usec
DE        6.50 usec
TE        298.0 K
D1        1.00000000 sec
TD0       1
  
```

```

===== CHANNEL f1 =====
SFO1      600.1739011 MHz
NUC1      1H
P1        9.96 usec
SI        65536
SF        600.1700000 MHz
WDW       EM
SSB       0
LB        0.30 Hz
GB        0
PC        1.00
  
```

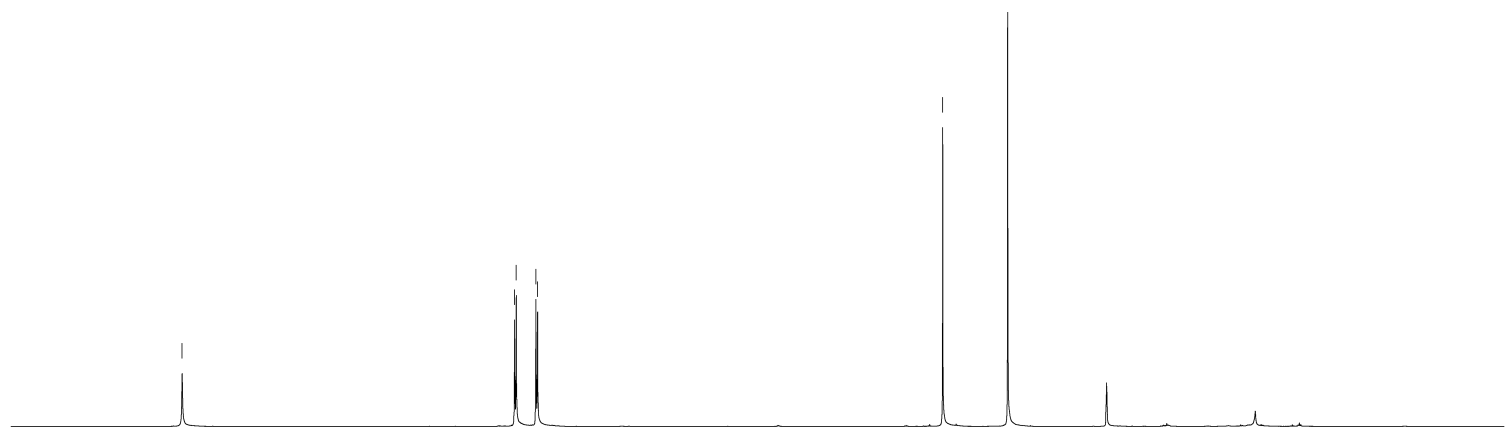

11 10 9 8 7 6 5 4 3 2 1 0 ppm

1.00

1.90  
2.02

2.06

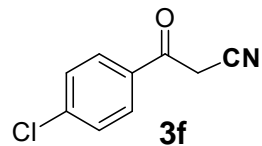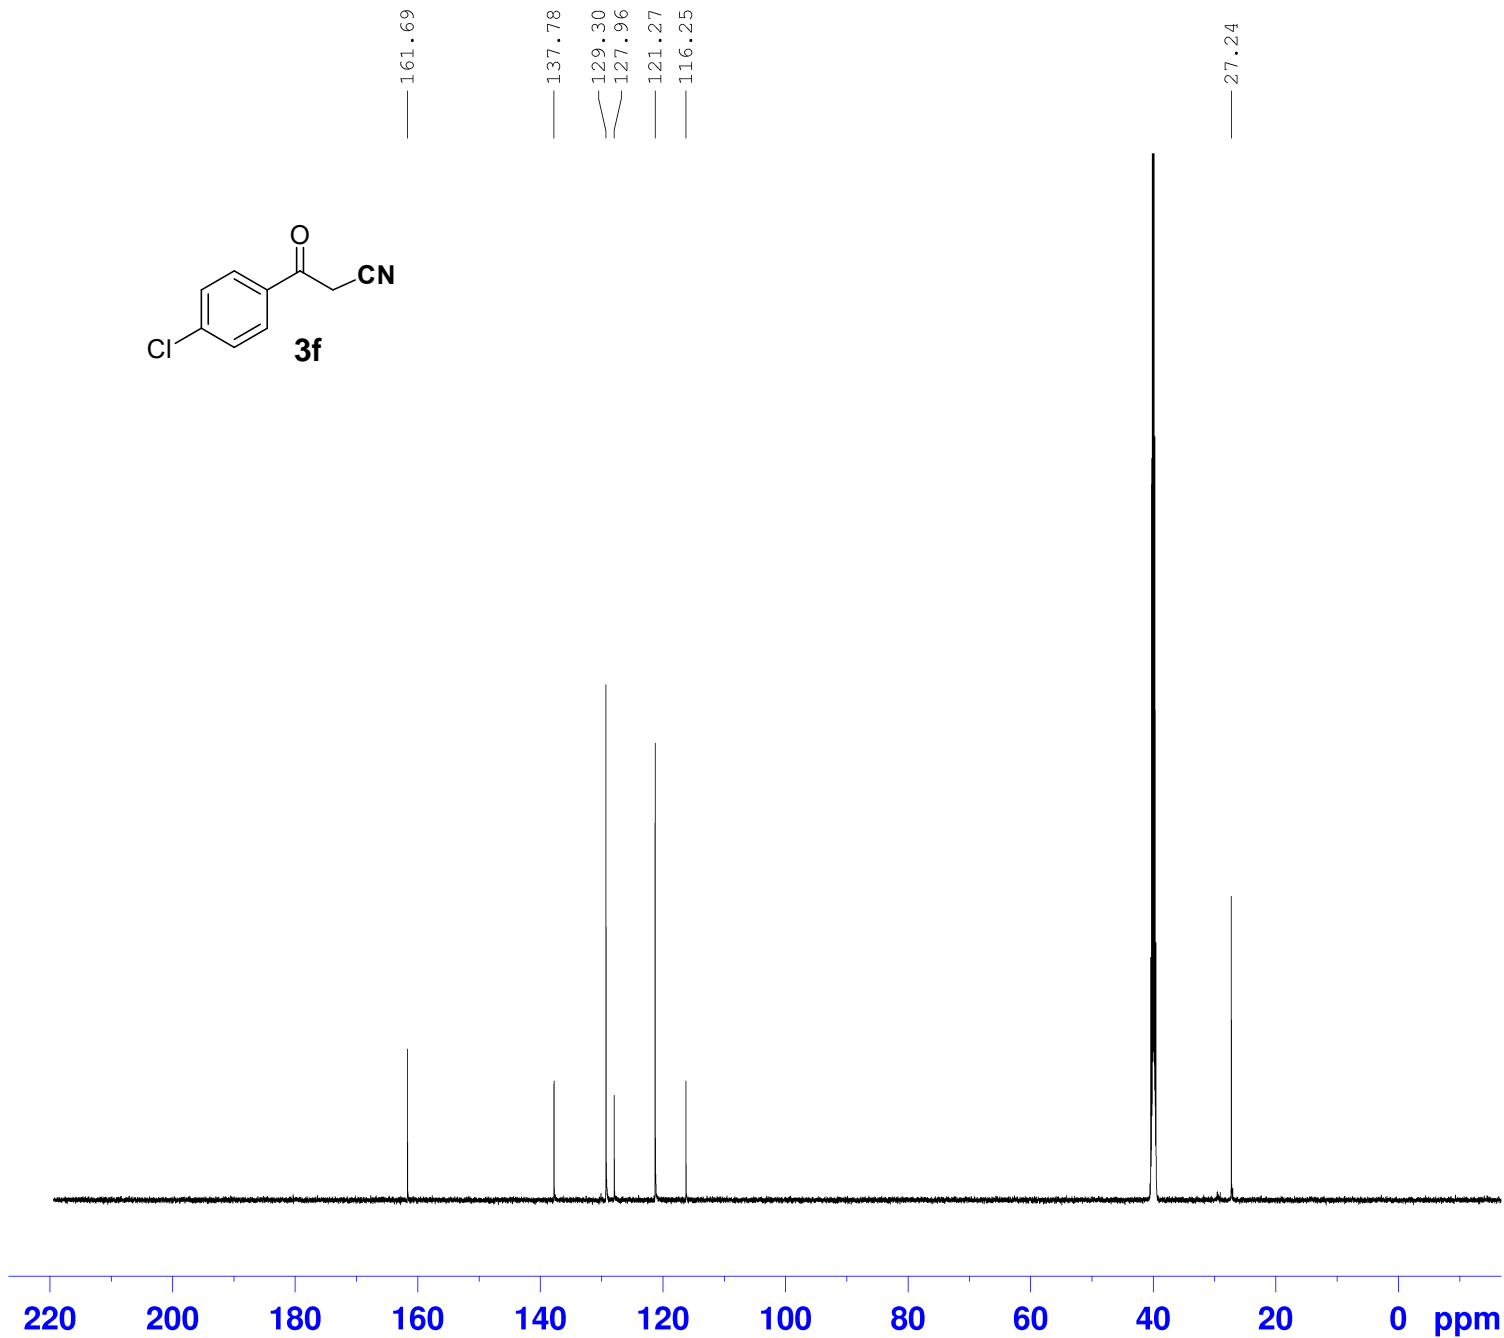

```

NAME      GG-669P-20220917
EXPNO     2
PROCNO    1
Date_     20220917
Time      13.22
INSTRUM   spect
PROBHD    5 mm PABBO BB/
PULPROG   zgpg30
TD         65536
SOLVENT   DMSO
NS         1024
DS         4
SWH       36057.691 Hz
FIDRES    0.550197 Hz
AQ         0.9088159 sec
RG         190.02
DW         13.867 usec
DE         6.50 usec
TE         298.0 K
D1         2.00000000 sec
D11        0.03000000 sec
TD0        1
  
```

```

===== CHANNEL f1 =====
SFO1      150.9279571 MHz
NUC1       13C
P1         11.90 usec
SI         32768
SF         150.9128665 MHz
WDW        EM
SSB        0
LB         1.00 Hz
GB         0
PC         1.40
  
```

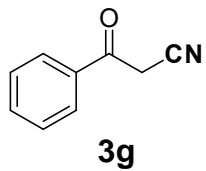

7.928  
 7.916  
 7.679  
 7.667  
 7.654  
 7.543  
 7.529  
 7.516

4.109

```

NAME      GG-586P-20220611
EXPNO     1
PROCNO    1
Date_     20220611
Time      12.47
INSTRUM   spect
PROBHD    5 mm PABBO BB/
PULPROG   zg30
TD         65536
SOLVENT   CDC13
NS         8
DS         0
SWH       9615.385 Hz
FIDRES    0.146719 Hz
AQ         3.4079220 sec
RG         62.22
DW         52.000 usec
DE         6.50 usec
TE         298.0 K
D1         1.00000000 sec
TD0        1
  
```

```

===== CHANNEL f1 =====
SFO1      600.1739011 MHz
NUC1       1H
P1         9.96 usec
SI         65536
SF         600.1700125 MHz
WDW        EM
SSB        0
LB         0.30 Hz
GB         0
PC         1.00
  
```

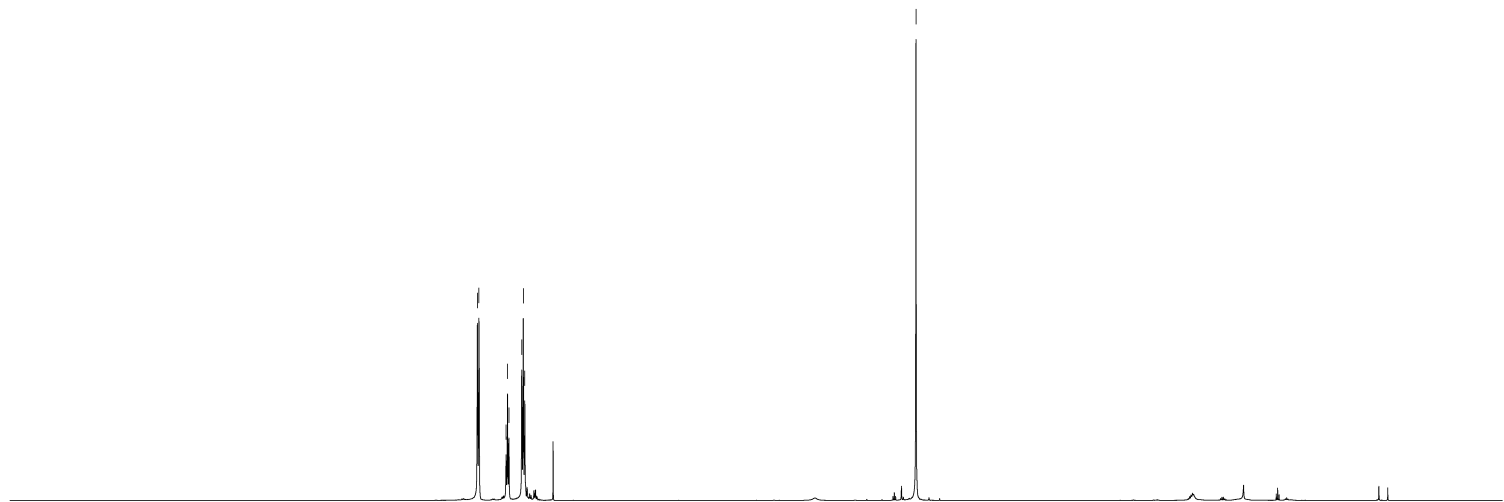

11 10 9 8 7 6 5 4 3 2 1 0 ppm

2.01  
1.05  
2.06

2.00

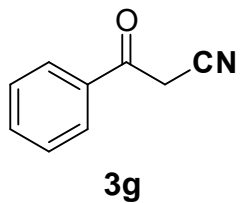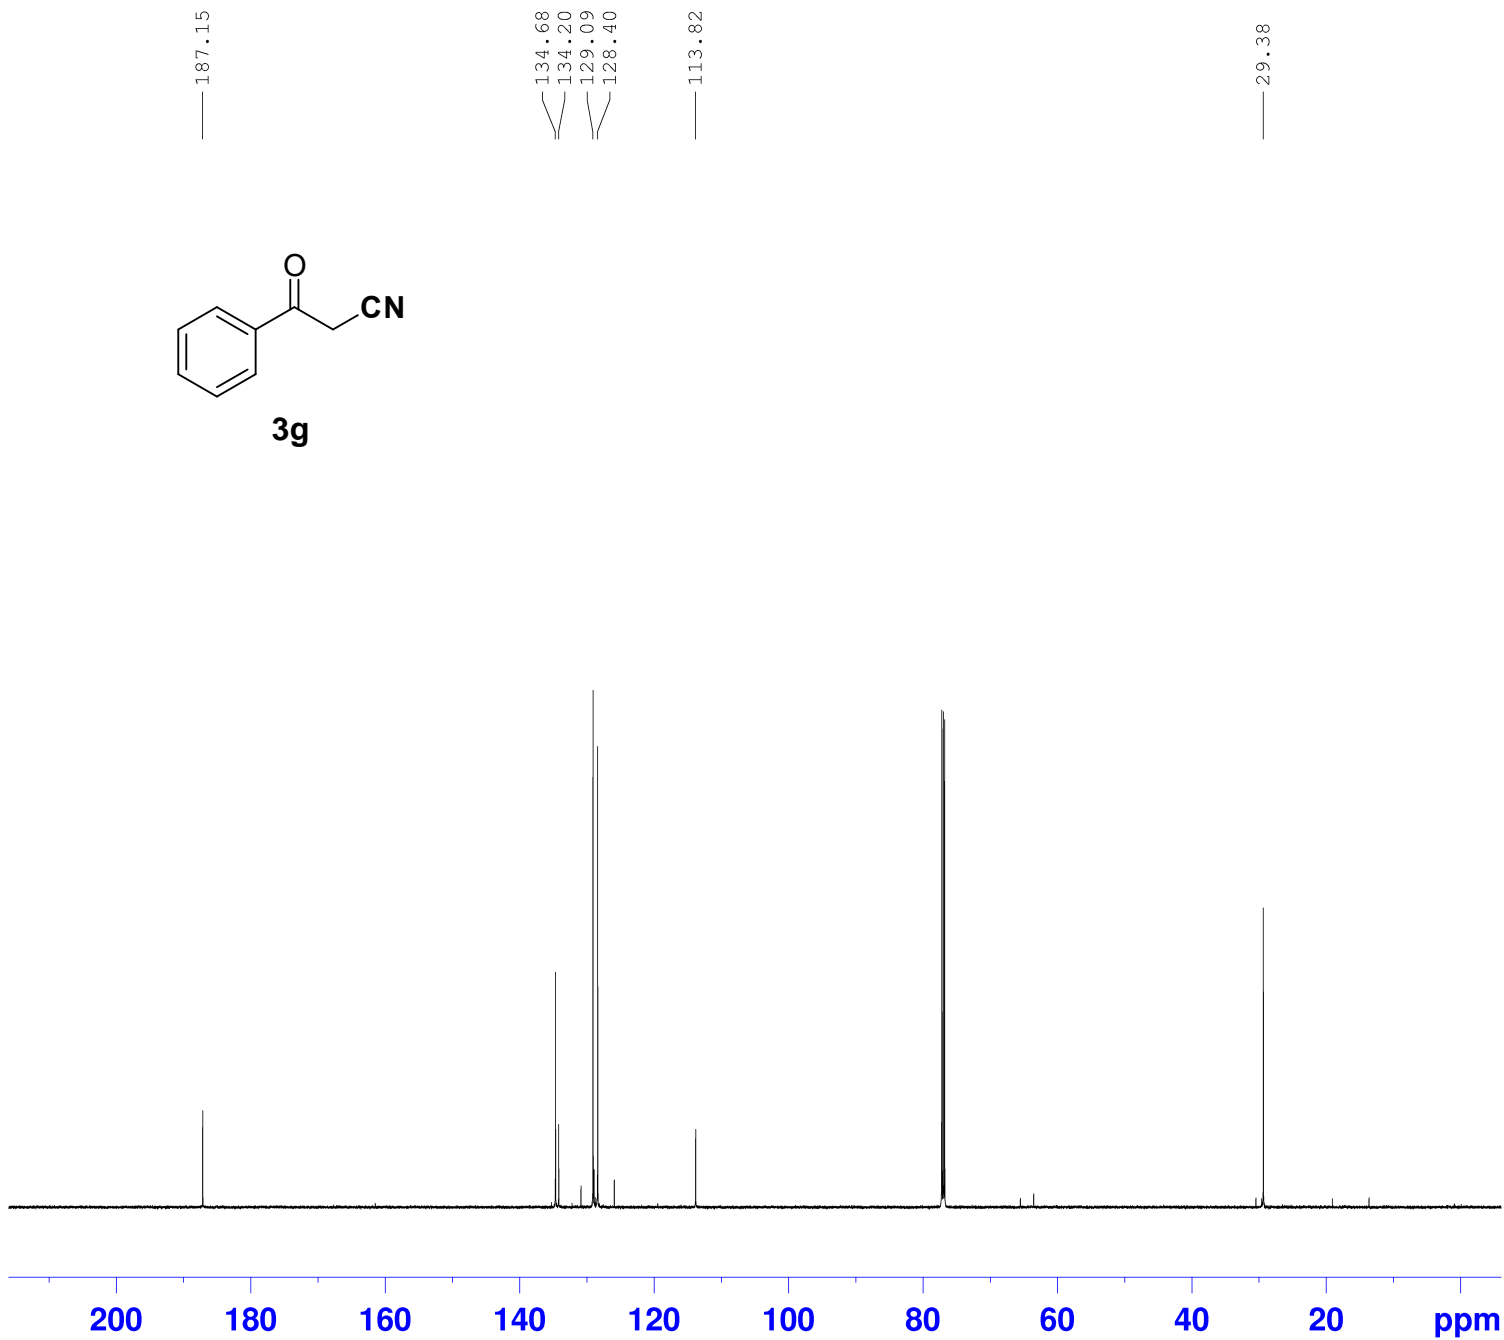

```

NAME      GG-586P-20220611
EXPNO     2
PROCNO    1
Date_     20220611
Time      13.39
INSTRUM   spect
PROBHD    5 mm PABBO BB/
PULPROG   zgpg30
TD        65536
SOLVENT   CDC13
NS        1024
DS        4
SWH       36057.691 Hz
FIDRES    0.550197 Hz
AQ        0.9088159 sec
RG        190.02
DW        13.867 usec
DE        6.50 usec
TE        298.0 K
D1        2.00000000 sec
D11       0.03000000 sec
TDO       1
  
```

```

===== CHANNEL f1 =====
SF01     150.9279571 MHz
NUC1     13C
P1       11.90 usec
SI       32768
SF       150.9128799 MHz
WDW      EM
SSB      0
LB       1.00 Hz
GB       0
PC       1.40
  
```

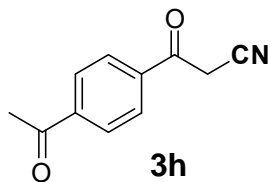

8.089  
8.075  
8.025  
8.011

4.144

2.665

```

NAME      GG-692-2P-20221027
EXPNO     1
PROCNO    1
Date_     20221028
Time      2.14
INSTRUM   spect
PROBHD    5 mm PABBO BB/
PULPROG   zg30
TD         65536
SOLVENT   CDCl3
NS         8
DS         0
SWH       9615.385 Hz
FIDRES    0.146719 Hz
AQ         3.4079220 sec
RG         76.92
DW         52.000 usec
DE         6.50 usec
TE         298.0 K
D1         1.00000000 sec
TD0        1
  
```

```

===== CHANNEL f1 =====
SFO1      600.1739011 MHz
NUC1       1H
P1         9.96 usec
SI         65536
SF         600.1700080 MHz
WDW        EM
SSB         0
LB         0.30 Hz
GB         0
PC         1.00
  
```

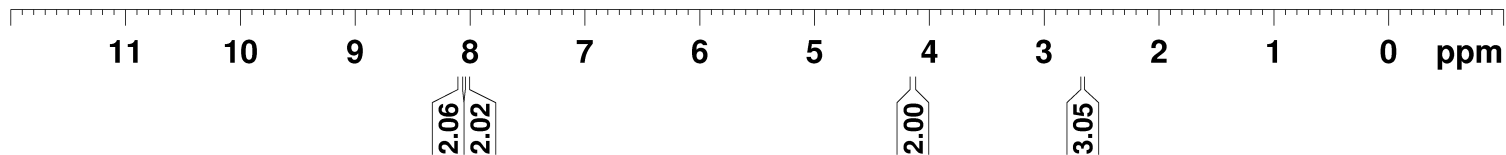

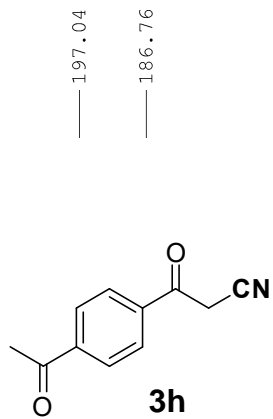

```

NAME      GG-692-2P-20221027
EXPNO     2
PROCNO    1
Date_     20221028
Time      3.06
INSTRUM   spect
PROBHD    5 mm PABBO BB/
PULPROG   zgpg30
TD        65536
SOLVENT   CDC13
NS        1024
DS        4
SWH       36057.691 Hz
FIDRES    0.550197 Hz
AQ        0.9088159 sec
RG        190.02
DW        13.867 usec
DE        6.50 usec
TE        298.0 K
D1        2.00000000 sec
D11       0.03000000 sec
TD0       1
  
```

```

===== CHANNEL f1 =====
SFO1     150.9279571 MHz
NUC1     13C
P1       11.90 usec
SI       32768
SF       150.9128665 MHz
WDW      EM
SSB      0
LB       1.00 Hz
GB       0
PC       1.40
  
```

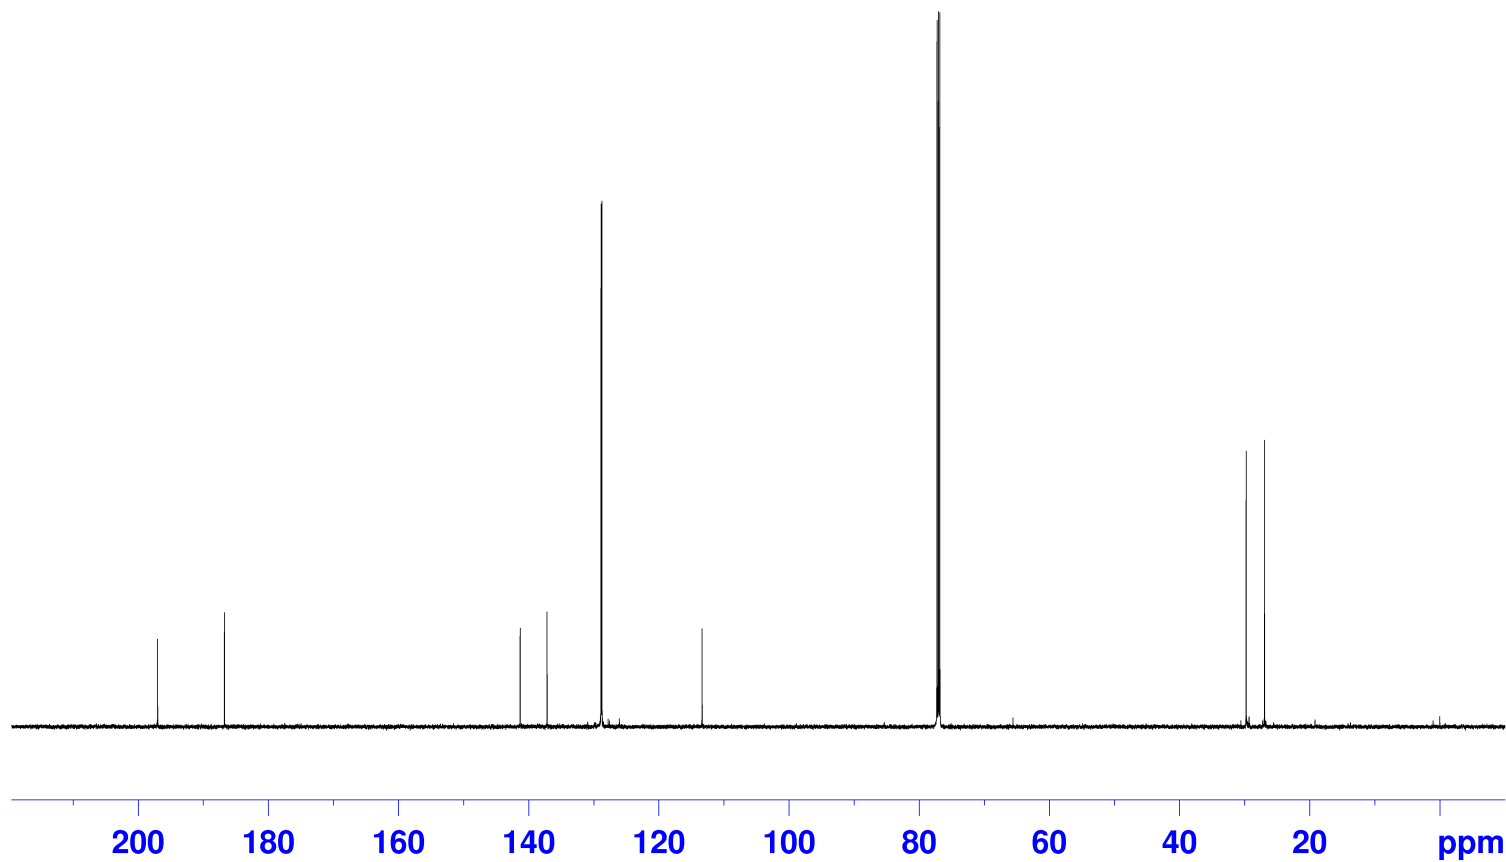



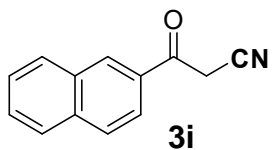

8.370  
7.965  
7.951  
7.943  
7.941  
7.927  
7.912  
7.898  
7.886  
7.872  
7.661  
7.649  
7.636  
7.599  
7.587  
7.574

4.204

```

NAME      GG-647P-20220707
EXPNO     1
PROCNO    1
Date_     20220707
Time      11.54
INSTRUM   spect
PROBHD    5 mm PABBO BB/
PULPROG   zg30
TD         65536
SOLVENT   CDCl3
NS         8
DS         0
SWH       9615.385 Hz
FIDRES    0.146719 Hz
AQ        3.4079220 sec
RG         50.85
DW         52.000 usec
DE         6.50 usec
TE         298.0 K
D1         1.00000000 sec
TD0        1
  
```

```

===== CHANNEL f1 =====
SFO1      600.1739011 MHz
NUC1       1H
P1         9.96 usec
SI         65536
SF         600.1700159 MHz
WDW        EM
SSB         0
LB         0.30 Hz
GB         0
PC         1.00
  
```

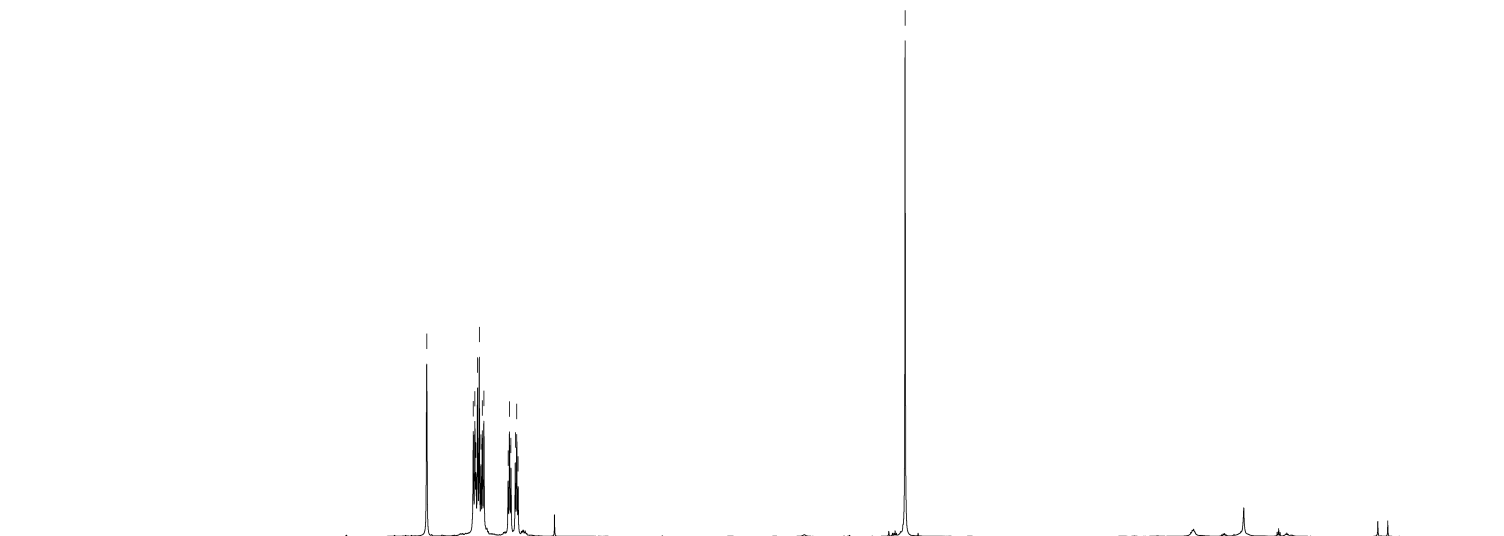

11 10 9 8 7 6 5 4 3 2 1 0 ppm

1.00  
4.15  
1.03  
1.01

2.00

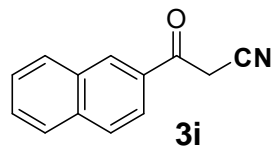

187.05

136.04  
132.17  
131.52  
130.64  
129.66  
129.44  
129.08  
127.84  
127.33  
123.28  
113.98

29.41

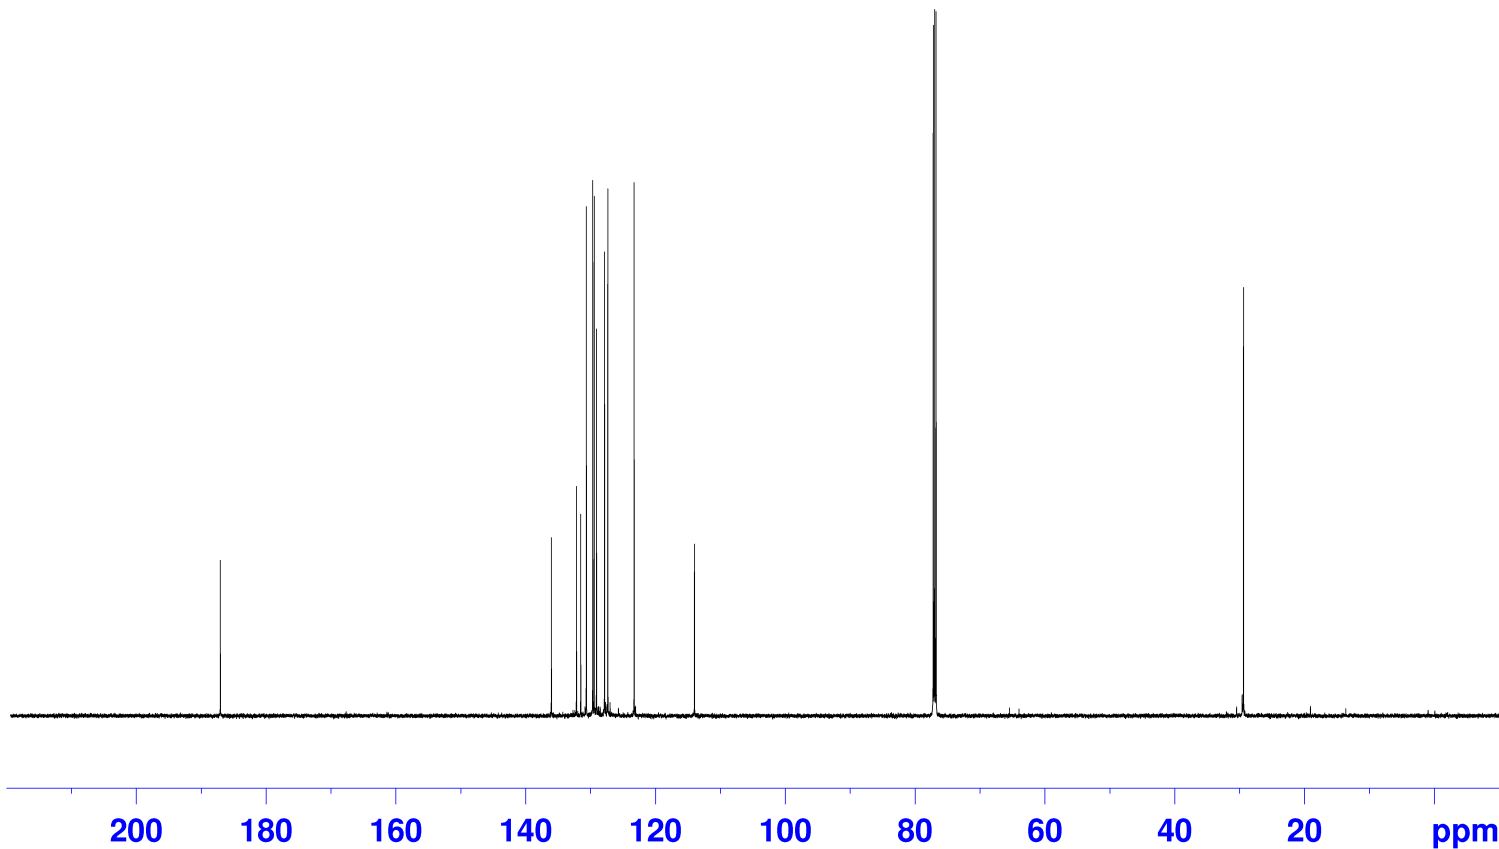

```

NAME      GG-647P-20220707
EXPNO     2
PROCNO    1
Date_     20220707
Time      12.35
INSTRUM   spect
PROBHD    5 mm PABBO BB/
PULPROG   zgpg30
TD        65536
SOLVENT   CDCl3
NS        800
DS        4
SWH       36057.691 Hz
FIDRES    0.550197 Hz
AQ        0.9088159 sec
RG        190.02
DW        13.867 usec
DE        6.50 usec
TE        298.5 K
D1        2.0000000 sec
D11       0.03000000 sec
TD0       1
  
```

```

===== CHANNEL f1 =====
SFO1     150.9279571 MHz
NUC1     13C
P1       11.90 usec
SI       32768
SF       150.9128821 MHz
WDW      EM
SSB      0
LB       1.00 Hz
GB       0
PC       1.40
  
```

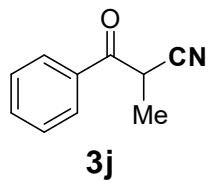

7.996  
7.984  
7.669  
7.656  
7.644  
7.544  
7.531  
7.518

4.398  
4.386  
4.374  
4.362

1.655  
1.643

```

NAME      GG-679P-20220930
EXPNO     1
PROCNO    1
Date_     20220930
Time      10.52
INSTRUM   spect
PROBHD    5 mm PABBO BB/
PULPROG   zg30
TD        65536
SOLVENT   CDC13
NS        8
DS        0
SWH       9615.385 Hz
FIDRES    0.146719 Hz
AQ        3.4079220 sec
RG        62.22
DW        52.000 usec
DE        6.50 usec
TE        298.0 K
D1        1.00000000 sec
TD0       1
  
```

```

===== CHANNEL f1 =====
SFO1     600.1739011 MHz
NUC1     1H
P1       9.96 usec
SI       65536
SF       600.1700124 MHz
WDW      EM
SSB      0
LB       0.30 Hz
GB       0
PC       1.00
  
```

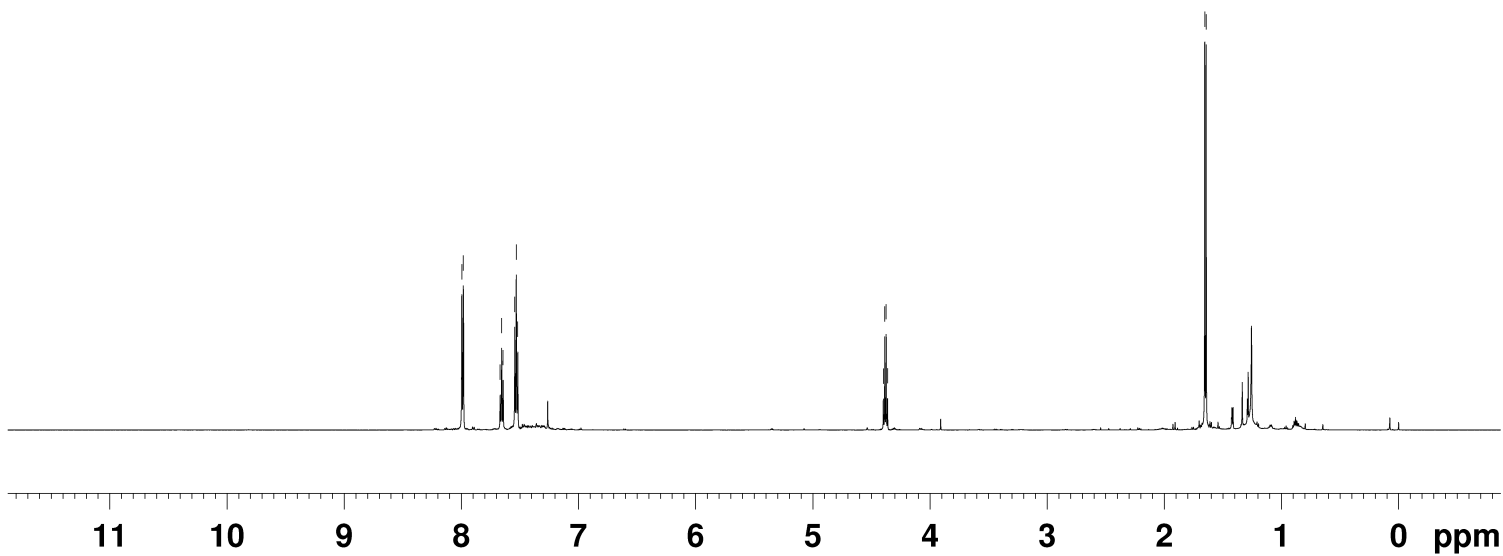

2.00  
1.05  
2.09

1.03

3.08

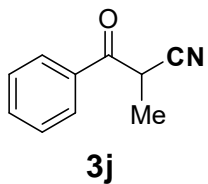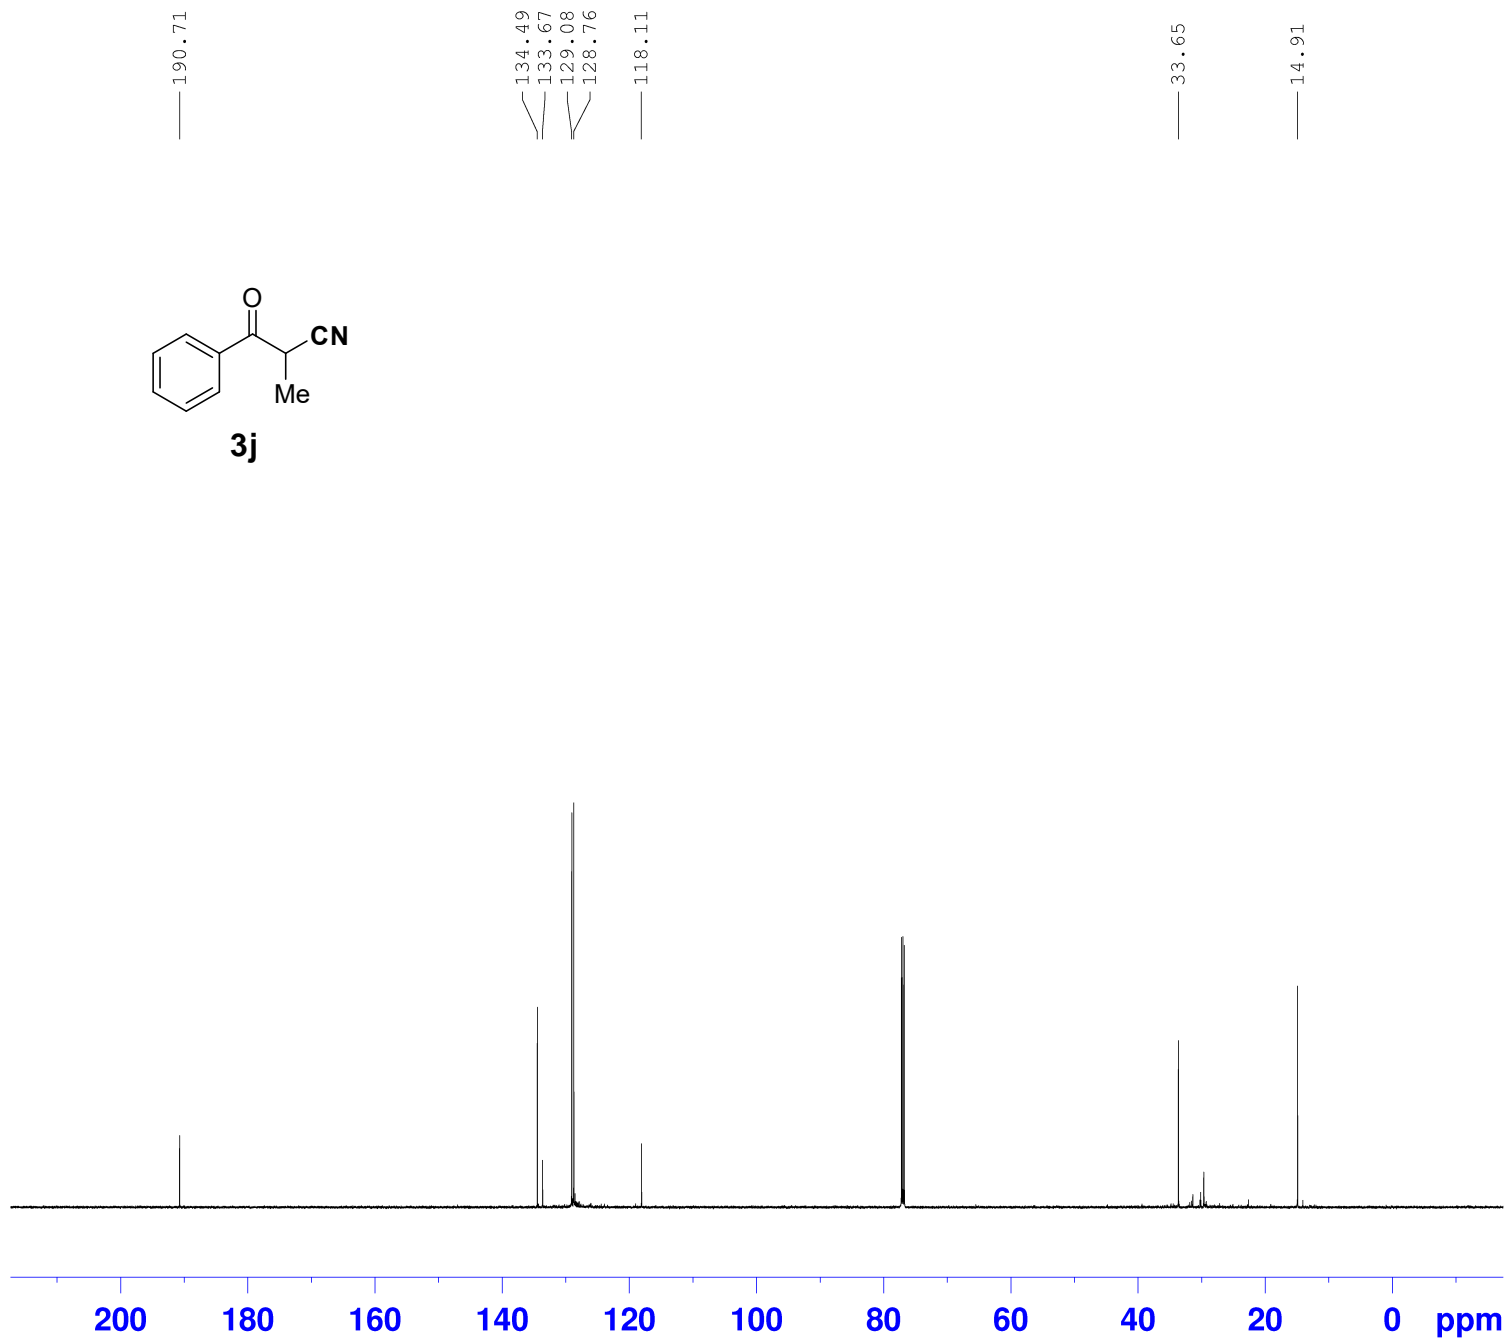

```

NAME      GG-679P-20220930
EXPNO     2
PROCNO    1
Date_     20220930
Time      11.43
INSTRUM   spect
PROBHD    5 mm PABBO BB/
PULPROG   zgpg30
TD         65536
SOLVENT   CDC13
NS         1024
DS         4
SWH       36057.691 Hz
FIDRES    0.550197 Hz
AQ         0.9088159 sec
RG         190.02
DW         13.867 usec
DE         6.50 usec
TE         298.0 K
D1         2.00000000 sec
D11        0.03000000 sec
TD0        1
  
```

```

===== CHANNEL f1 =====
SF01      150.9279571 MHz
NUC1       13C
P1         11.90 usec
SI         32768
SF         150.9128744 MHz
WDW        EM
SSB        0
LB         1.00 Hz
GB         0
PC         1.40
  
```

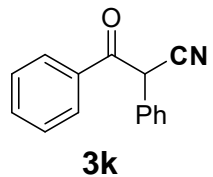

7.959  
 7.947  
 7.945  
 7.608  
 7.596  
 7.583  
 7.478  
 7.464  
 7.452  
 7.450  
 7.437  
 7.414  
 7.402  
 7.399  
 7.389  
 7.372  
 7.360  
 — 5.596

NAME GG-642P-20220710  
 EXPNO 1  
 PROCNO 1  
 Date\_ 20220711  
 Time 13.50  
 INSTRUM spect  
 PROBHD 5 mm PABBO BB/  
 PULPROG zg30  
 TD 65536  
 SOLVENT CDCl3  
 NS 8  
 DS 0  
 SWH 9615.385 Hz  
 FIDRES 0.146719 Hz  
 AQ 3.4079220 sec  
 RG 109.27  
 DW 52.000 usec  
 DE 6.50 usec  
 TE 298.0 K  
 D1 1.00000000 sec  
 TD0 1

===== CHANNEL f1 =====  
 SFO1 600.1739011 MHz  
 NUC1 1H  
 P1 9.96 usec  
 SI 65536  
 SF 600.1700152 MHz  
 WDW EM  
 SSB 0  
 LB 0.30 Hz  
 GB 0  
 PC 1.00

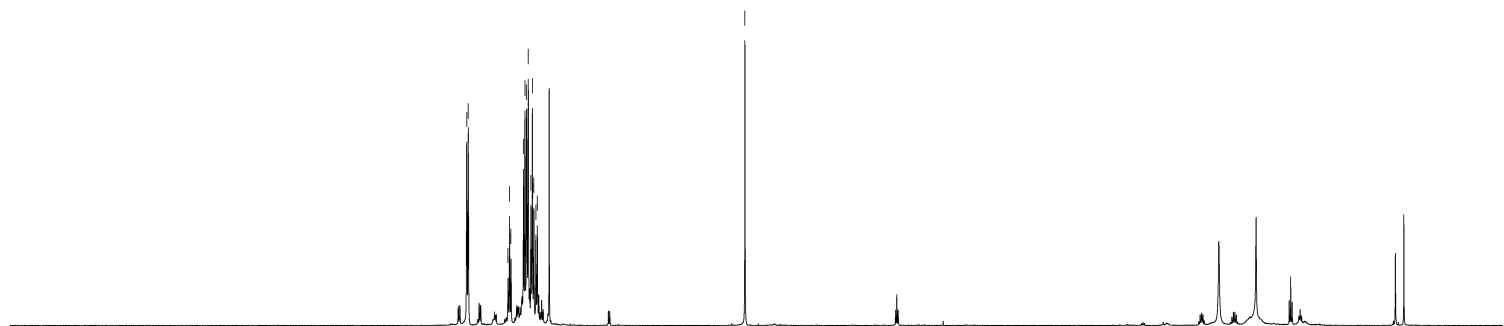

11 10 9 8 7 6 5 4 3 2 1 0 ppm

2.02  
 1.06  
 4.05  
 2.02  
 0.89

1.00

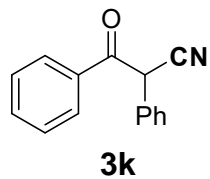

188.86

134.44  
133.65  
130.36  
129.68  
129.29  
129.16  
129.04  
128.25  
116.52

46.70

```

NAME      GG-642P-20220710
EXPNO     2
PROCNO    1
Date_     20220711
Time      14.42
INSTRUM   spect
PROBHD    5 mm PABBO BB/
PULPROG   zgpg30
TD         65536
SOLVENT   CDC13
NS         1024
DS         4
SWH        36057.691 Hz
FIDRES     0.550197 Hz
AQ         0.9088159 sec
RG         190.02
DW         13.867 usec
DE         6.50 usec
TE         298.5 K
D1         2.00000000 sec
D11        0.03000000 sec
TD0        1
  
```

```

===== CHANNEL f1 =====
SF01      150.9279571 MHz
NUC1       13C
P1         11.90 usec
SI         32768
SF         150.9128665 MHz
WDW        EM
SSB        0
LB         1.00 Hz
GB         0
PC         1.40
  
```

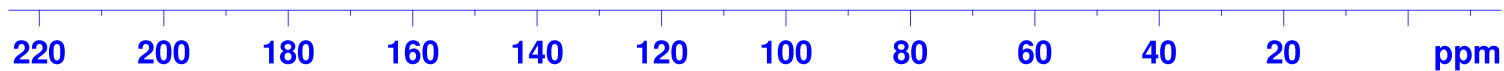

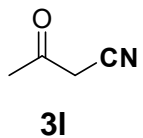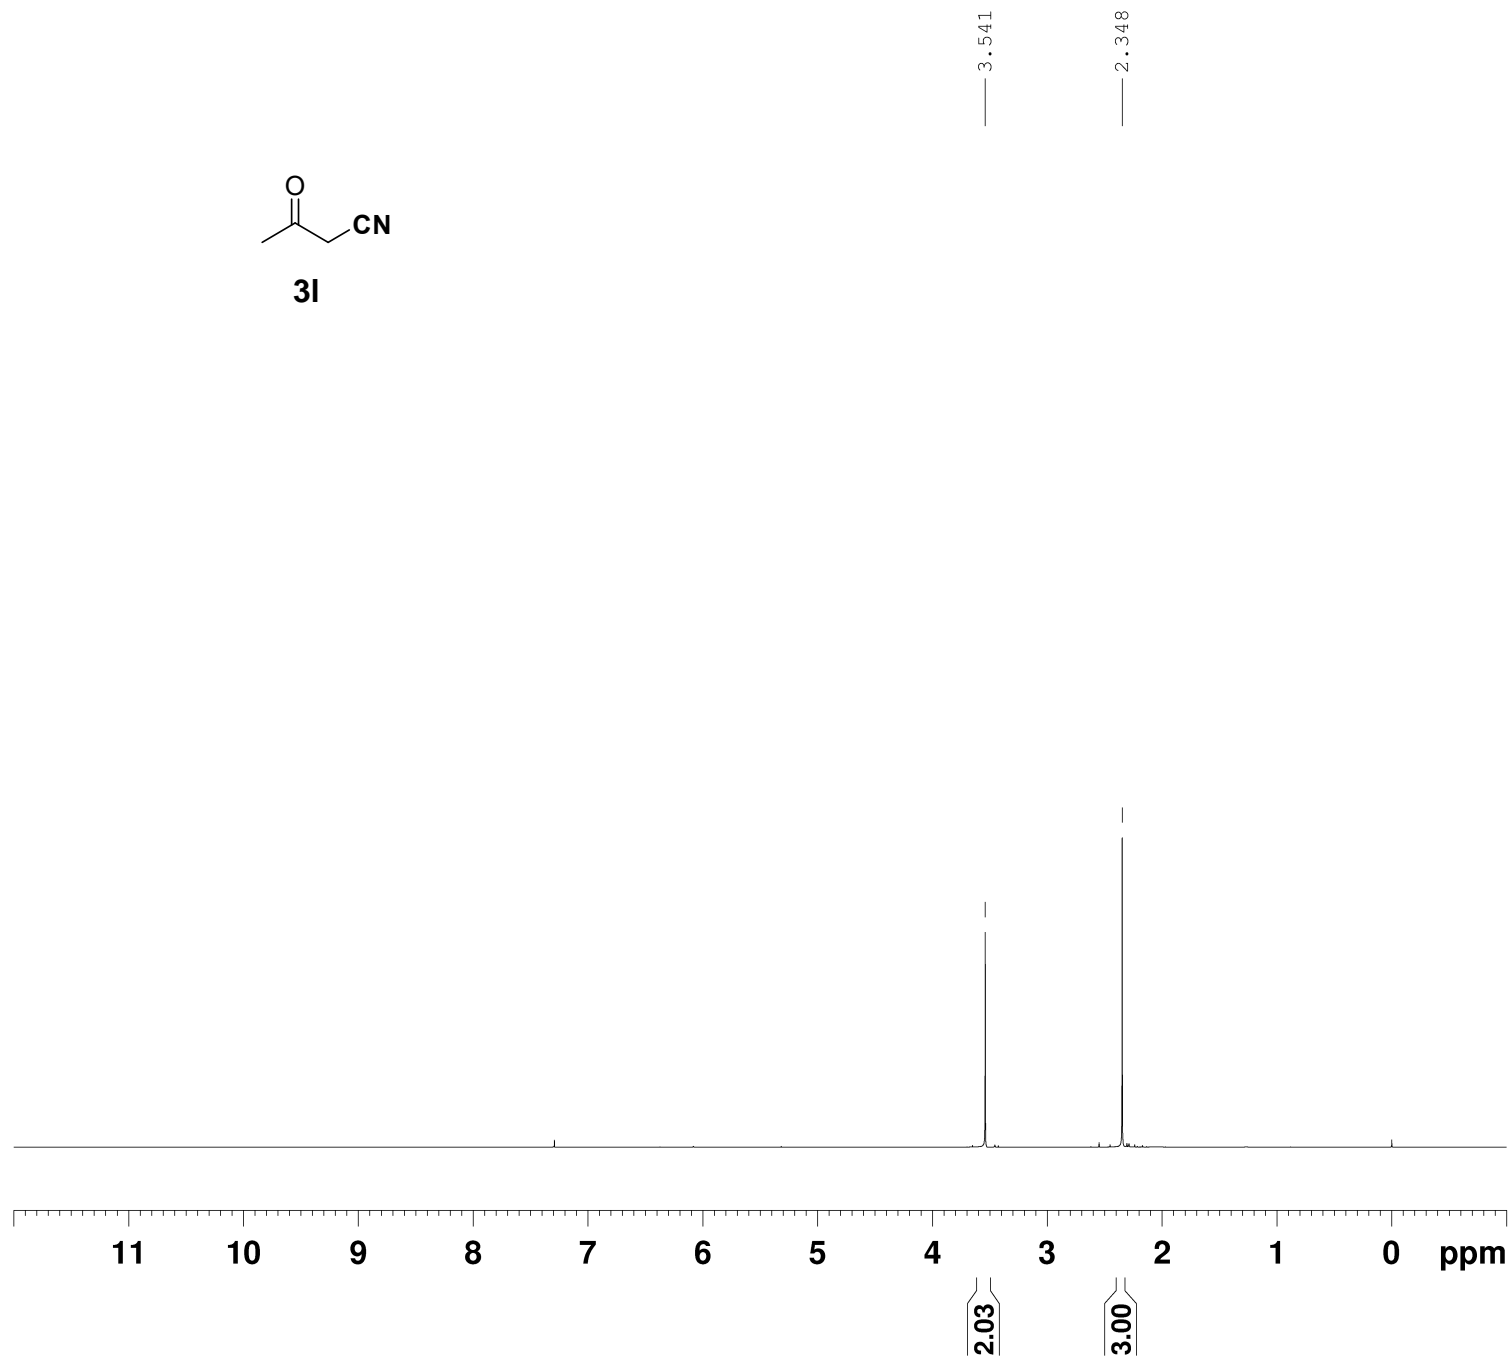

NAME GG-703P-20221031  
EXPNO 1  
PROCNO 1  
Date\_ 20221031  
Time 22.37  
INSTRUM spect  
PROBHD 5 mm PABBO BB/  
PULPROG zg30  
TD 65536  
SOLVENT CDCl3  
NS 8  
DS 0  
SWH 9615.385 Hz  
FIDRES 0.146719 Hz  
AQ 3.4079220 sec  
RG 56.75  
DW 52.000 usec  
DE 6.50 usec  
TE 298.0 K  
D1 1.00000000 sec  
TD0 1

===== CHANNEL f1 =====  
SFO1 600.1739011 MHz  
NUC1 1H  
P1 9.96 usec  
SI 65536  
SF 600.1699952 MHz  
WDW EM  
SSB 0  
LB 0.30 Hz  
GB 0  
PC 1.00

— 195.36

— 113.87

— 32.84  
— 29.32

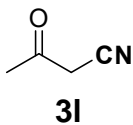

NAME GG-703P-20221031  
EXPNO 2  
PROCNO 1  
Date\_ 20221031  
Time 23.18  
INSTRUM spect  
PROBHD 5 mm PABBO BB/  
PULPROG zgpg30  
TD 65536  
SOLVENT CDCl3  
NS 800  
DS 4  
SWH 36057.691 Hz  
FIDRES 0.550197 Hz  
AQ 0.9088159 sec  
RG 190.02  
DW 13.867 usec  
DE 6.50 usec  
TE 298.0 K  
D1 2.0000000 sec  
D11 0.03000000 sec  
TD0 1

==== CHANNEL f1 =====  
SF01 150.9279571 MHz  
NUC1 13C  
P1 11.90 usec  
SI 32768  
SF 150.9128665 MHz  
WDW EM  
SSB 0  
LB 1.00 Hz  
GB 0  
PC 1.40

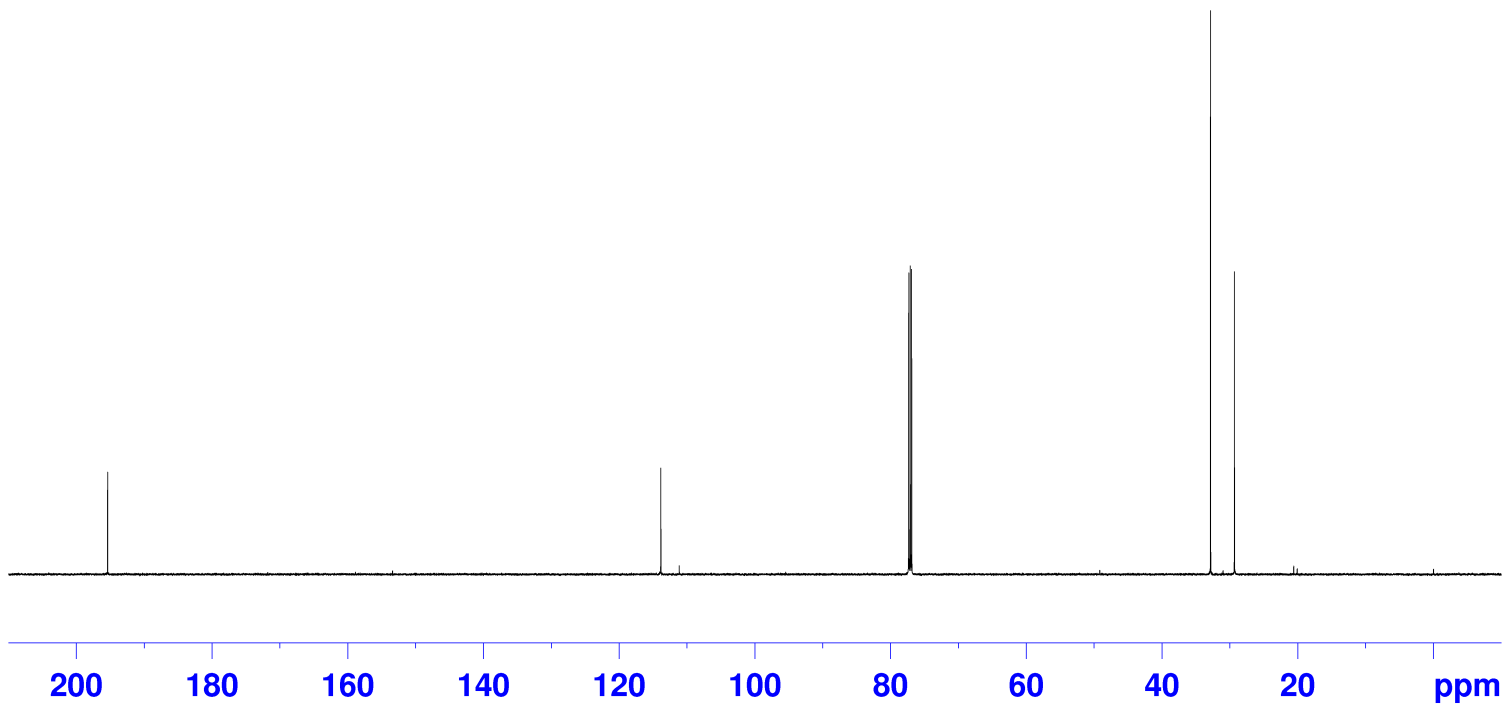



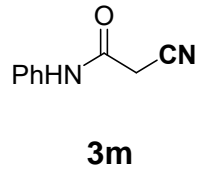

10.294

7.556  
7.536  
7.359  
7.354  
7.339  
7.319  
7.116  
7.098

3.901

```

NAME      gg-569p-1-20220607
EXPNO     1
PROCNO    1
Date_     20220607
Time      22.04
INSTRUM   spect
PROBHD    5 mm PABBO BB-
PULPROG   zg30
TD         32768
SOLVENT   DMSO
NS         8
DS         0
SWH       6393.862 Hz
FIDRES    0.195125 Hz
AQ         2.5625076 sec
RG         322
DW         78.200 usec
DE         6.50 usec
TE         296.2 K
D1         1.0000000 sec
TD0        1
  
```

```

===== CHANNEL f1 =====
NUC1      1H
P1         10.40 usec
PL1        -1.00 dB
PL1W      17.01305389 W
SFO1      400.1326008 MHz
SI         32768
SF         400.1300000 MHz
WDW        EM
SSB         0
LB         0.30 Hz
GB         0
PC         1.00
  
```

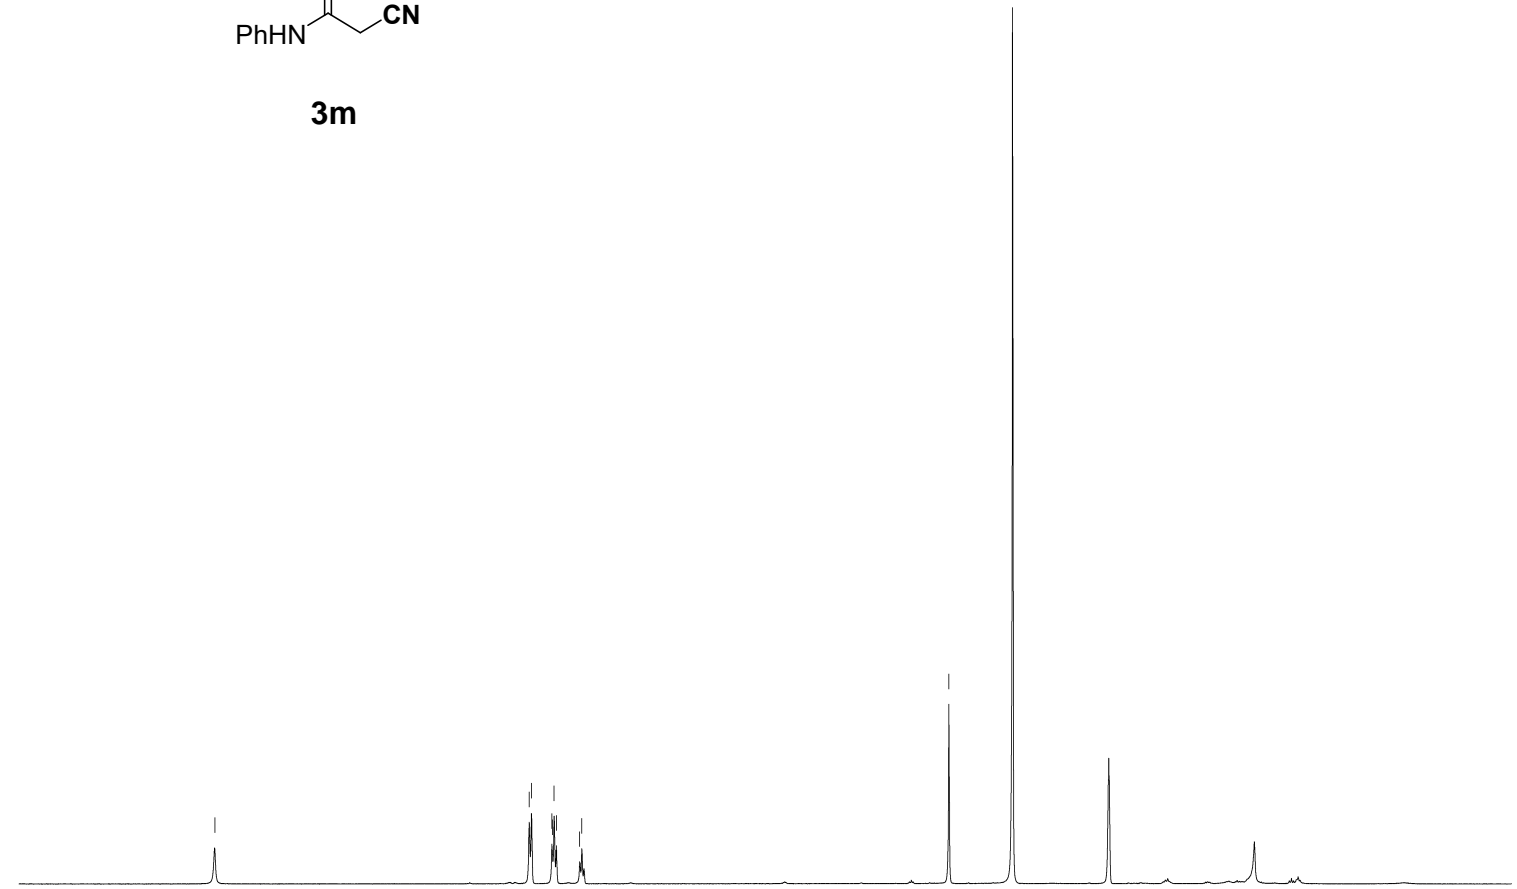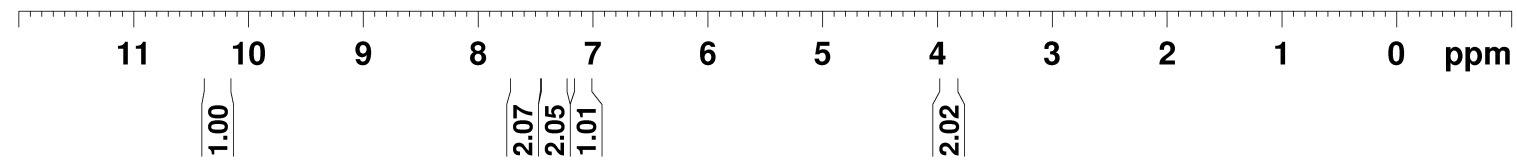

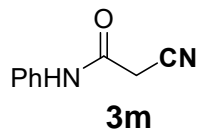

166.21  
 143.58  
 134.20  
 134.06  
 129.18  
 129.05  
 124.45  
 121.14

31.93

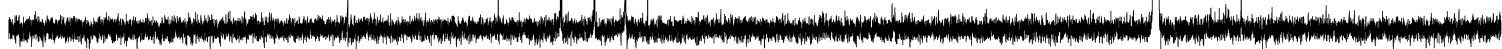

200 180 160 140 120 100 80 60 40 20 ppm

```

NAME      GG-569P-3-220607
EXPNO     2
PROCNO    1
Date_     20220608
Time      6.45
INSTRUM   spect
PROBHD    5 mm PABBO BB/
PULPROG   zgpg30
TD         65536
SOLVENT   CDC13
NS         824
DS         4
SWH       36057.691 Hz
FIDRES    0.550197 Hz
AQ         0.9088159 sec
RG         190.02
DW         13.867 usec
DE         6.50 usec
TE         298.0 K
D1         2.00000000 sec
D11        0.03000000 sec
TD0        1
  
```

```

===== CHANNEL f1 =====
SFO1     150.9279571 MHz
NUC1      13C
P1        11.90 usec
SI        32768
SF        150.9128665 MHz
WDW       EM
SSB       0
LB        1.00 Hz
GB        0
PC        1.40
  
```

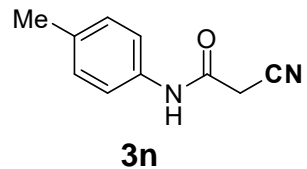

10.207

7.437  
7.423  
7.143  
7.129

3.869

2.258

```

NAME      GG-615P-20220629
EXPNO     1
PROCNO    1
Date_     20220629
Time      10.54
INSTRUM   spect
PROBHD    5 mm PABBO BB/
PULPROG   zg30
TD         65536
SOLVENT   DMSO
NS         8
DS         0
SWH       9615.385 Hz
FIDRES    0.146719 Hz
AQ         3.4079220 sec
RG         56.75
DW         52.000 usec
DE         6.50 usec
TE         298.0 K
D1         1.00000000 sec
TD0        1
  
```

```

===== CHANNEL f1 =====
SFO1      600.1739011 MHz
NUC1       1H
P1         9.96 usec
SI         65536
SF         600.1700000 MHz
WDW        EM
SSB        0
LB         0.30 Hz
GB         0
PC         1.00
  
```

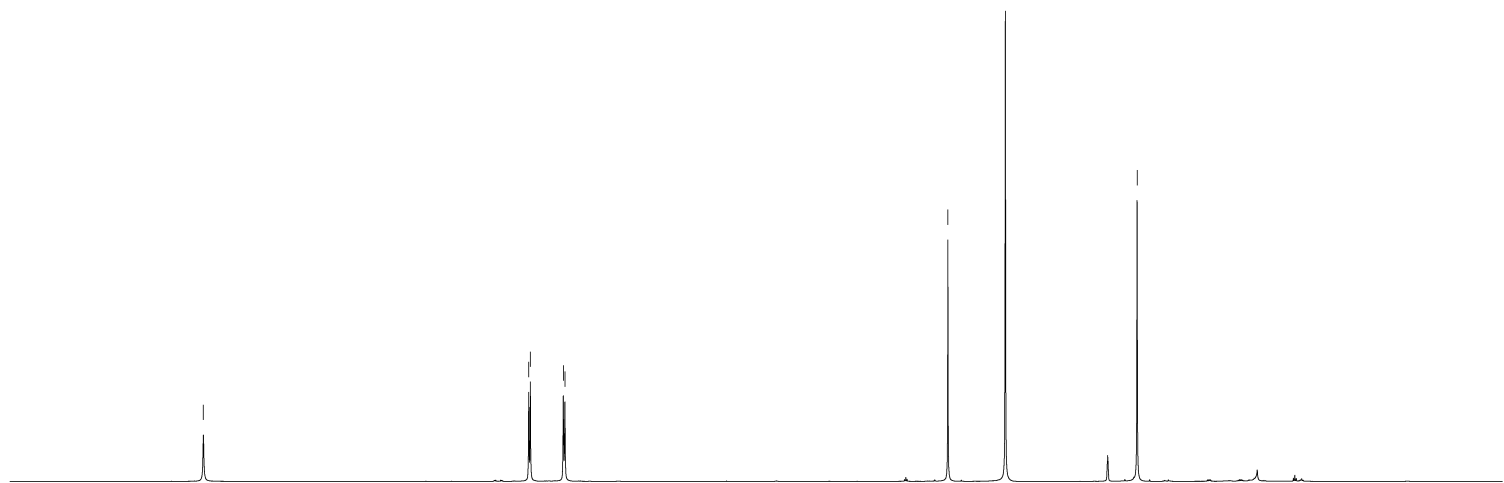

11 10 9 8 7 6 5 4 3 2 1 0 ppm

1.01

2.00

2.02

2.03

3.08

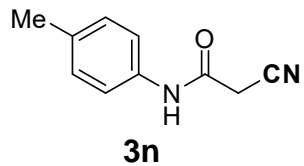

161.18

136.32  
133.38  
129.73

119.72  
116.44

27.09  
20.90

```

NAME      GG-615P-20220629
EXPNO     2
PROCNO    1
Date_     20220629
Time      11.47
INSTRUM   spect
PROBHD    5 mm PABBO BB/
PULPROG   zgpg30
TD         65536
SOLVENT   DMSO
NS         1024
DS         4
SWH        36057.691 Hz
FIDRES     0.550197 Hz
AQ         0.9088159 sec
RG         190.02
DW         13.867 usec
DE         6.50 usec
TE         298.0 K
D1         2.00000000 sec
D11        0.03000000 sec
TD0        1
  
```

```

===== CHANNEL f1 =====
SF01      150.9279571 MHz
NUC1       13C
P1         11.90 usec
SI         32768
SF         150.9128665 MHz
WDW        EM
SSB        0
LB         1.00 Hz
GB         0
PC         1.40
  
```

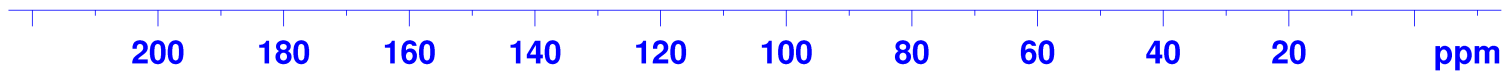

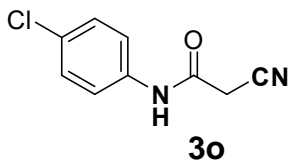

10.435

7.585  
7.570  
7.402  
7.387

3.913

```

NAME      GG-669P-20220917
EXPNO     1
PROCNO    1
Date_     20220917
Time      12.30
INSTRUM   spect
PROBHD    5 mm PABBO BB/
PULPROG   zg30
TD         65536
SOLVENT   DMSO
NS         8
DS         0
SWH        9615.385 Hz
FIDRES     0.146719 Hz
AQ         3.4079220 sec
RG         87.54
DW         52.000 usec
DE         6.50 usec
TE         298.0 K
D1         1.00000000 sec
TD0        1
  
```

```

===== CHANNEL f1 =====
SFO1      600.1739011 MHz
NUC1       1H
P1         9.96 usec
SI         65536
SF         600.1700000 MHz
WDW        EM
SSB        0
LB         0.30 Hz
GB         0
PC         1.00
  
```

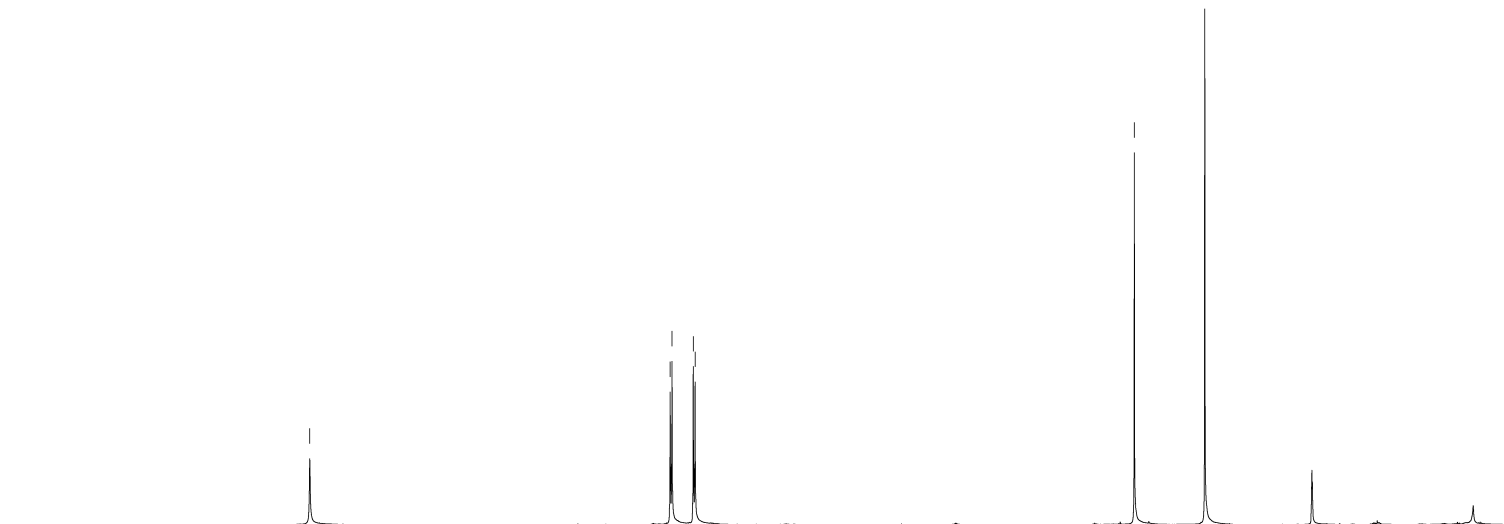

12 11 10 9 8 7 6 5 4 3 2 ppm

1.00

1.90  
2.02

2.06

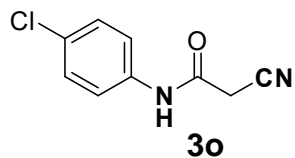

161.69  
 137.78  
 129.30  
 127.96  
 121.27  
 116.25

27.24

NAME GG-669P-20220917  
 EXPNO 2  
 PROCNO 1  
 Date\_ 20220917  
 Time 13.22  
 INSTRUM spect  
 PROBHD 5 mm PABBO BB/  
 PULPROG zgpg30  
 TD 65536  
 SOLVENT DMSO  
 NS 1024  
 DS 4  
 SWH 36057.691 Hz  
 FIDRES 0.550197 Hz  
 AQ 0.9088159 sec  
 RG 190.02  
 DW 13.867 usec  
 DE 6.50 usec  
 TE 298.0 K  
 D1 2.0000000 sec  
 D11 0.03000000 sec  
 TD0 1

==== CHANNEL f1 =====  
 SF01 150.9279571 MHz  
 NUC1 13C  
 P1 11.90 usec  
 SI 32768  
 SF 150.9128665 MHz  
 WDW EM  
 SSB 0  
 LB 1.00 Hz  
 GB 0  
 PC 1.40

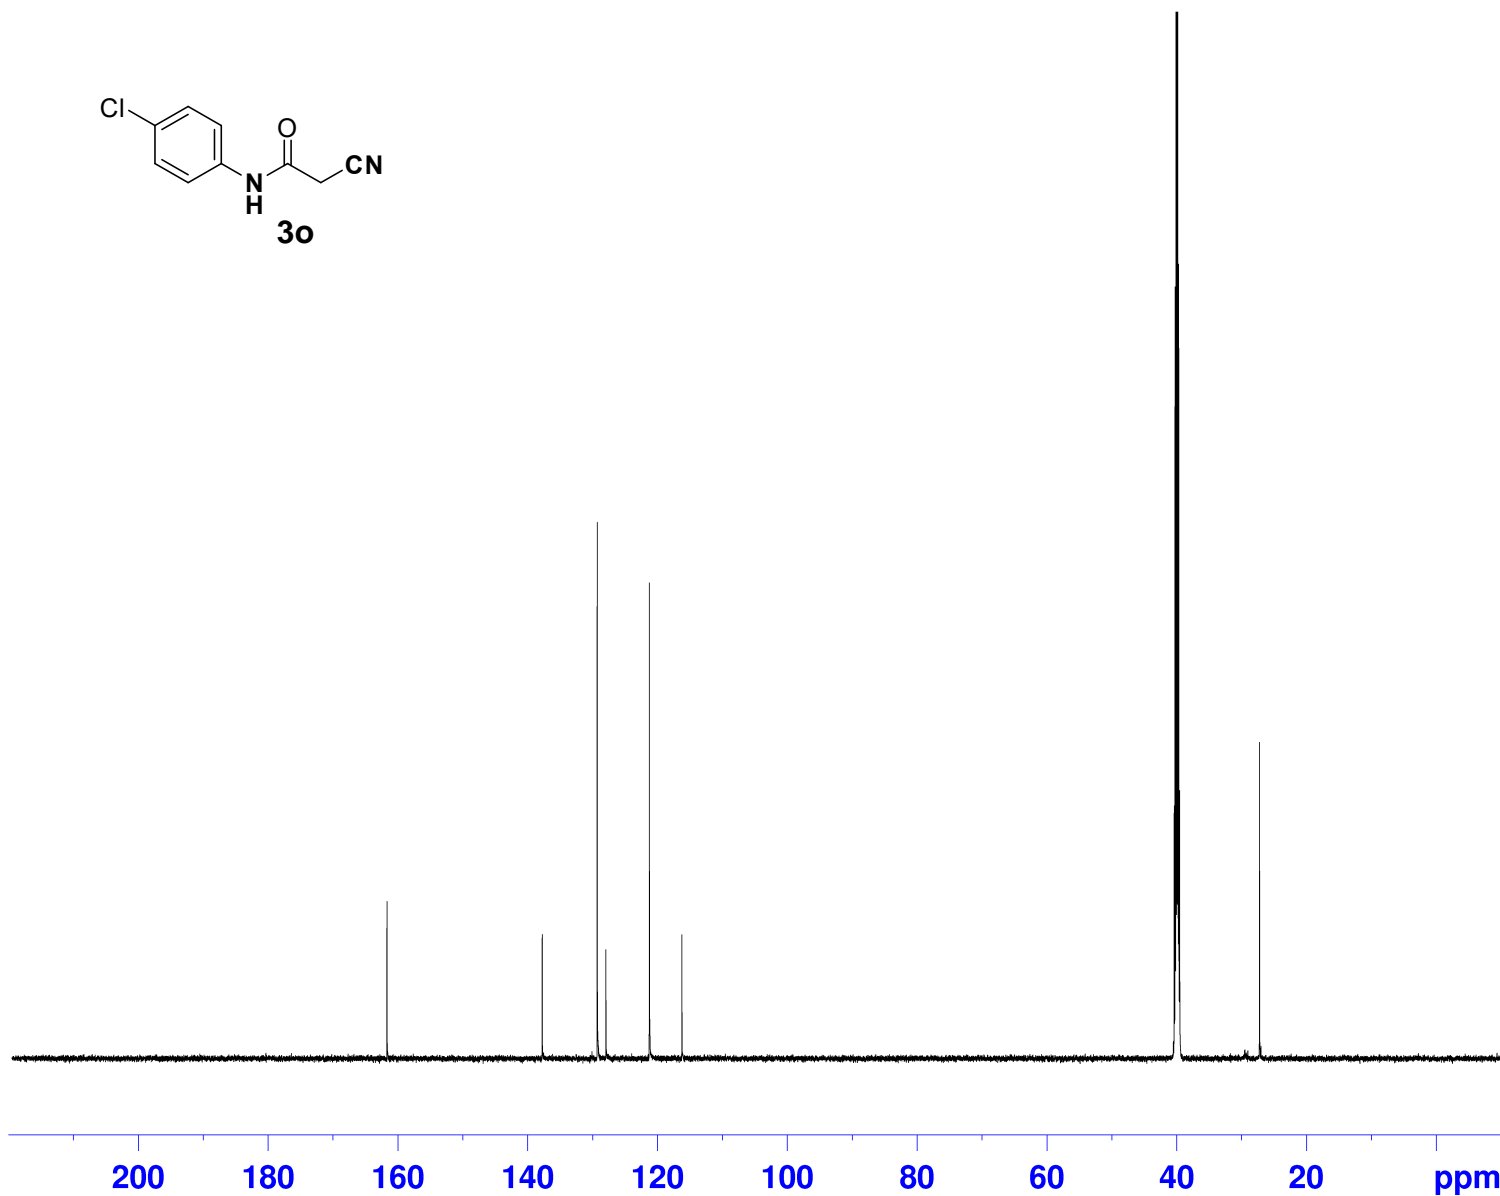

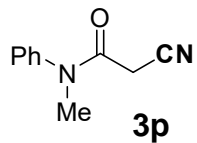

7.504  
7.492  
7.479  
7.444  
7.431  
7.262  
7.260  
7.247

3.318  
3.249

```

NAME      GG-572P-20220609
EXPNO     1
PROCNO    1
Date_     20220610
Time      4.10
INSTRUM   spect
PROBHD    5 mm PABBO BB/
PULPROG   zg30
TD        65536
SOLVENT   CDCl3
NS        8
DS        0
SWH       9615.385 Hz
FIDRES    0.146719 Hz
AQ        3.4079220 sec
RG        44.5
DW        52.000 usec
DE        6.50 usec
TE        298.0 K
D1        1.00000000 sec
TD0       1
  
```

```

===== CHANNEL f1 =====
SFO1     600.1739011 MHz
NUC1     1H
P1       9.96 usec
SI       65536
SF       600.1699985 MHz
WDW      EM
SSB      0
LB       0.30 Hz
GB       0
PC       1.00
  
```

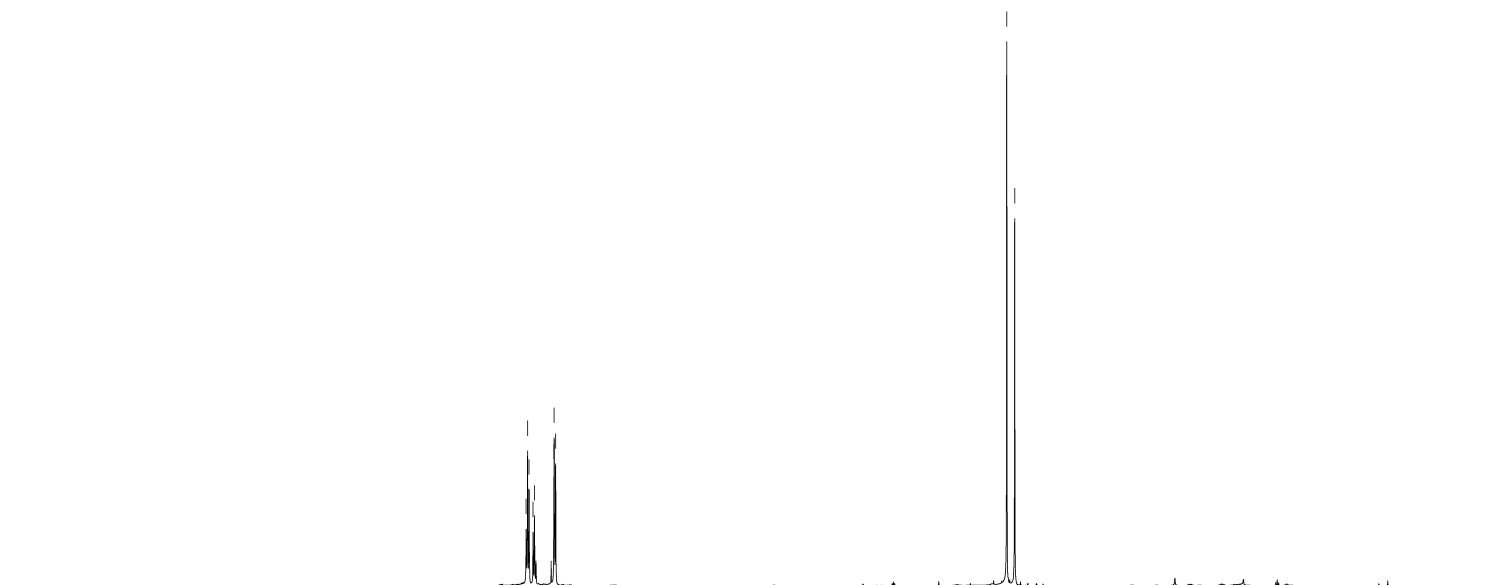

11 10 9 8 7 6 5 4 3 2 1 0 ppm

2.03  
1.01  
2.00

3.05  
2.06

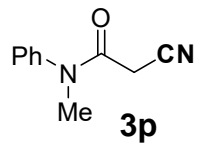

161.64  
 142.26  
 130.36  
 128.92  
 126.95  
 114.11

37.78  
 25.35

```

NAME      GG-572P-20220609
EXPNO     2
PROCNO    1
Date_     20220610
Time      5.02
INSTRUM   spect
PROBHD    5 mm PABBO BB/
PULPROG   zgpg30
TD         65536
SOLVENT   CDC13
NS         1024
DS         4
SWH        36057.691 Hz
FIDRES     0.550197 Hz
AQ         0.9088159 sec
RG         190.02
DW         13.867 usec
DE         6.50 usec
TE         298.0 K
D1         2.00000000 sec
D11        0.03000000 sec
TD0        1
  
```

```

===== CHANNEL f1 =====
SFO1      150.9279571 MHz
NUC1       13C
P1         11.90 usec
SI         32768
SF         150.9128863 MHz
WDW        EM
SSB        0
LB         1.00 Hz
GB         0
PC         1.40
  
```

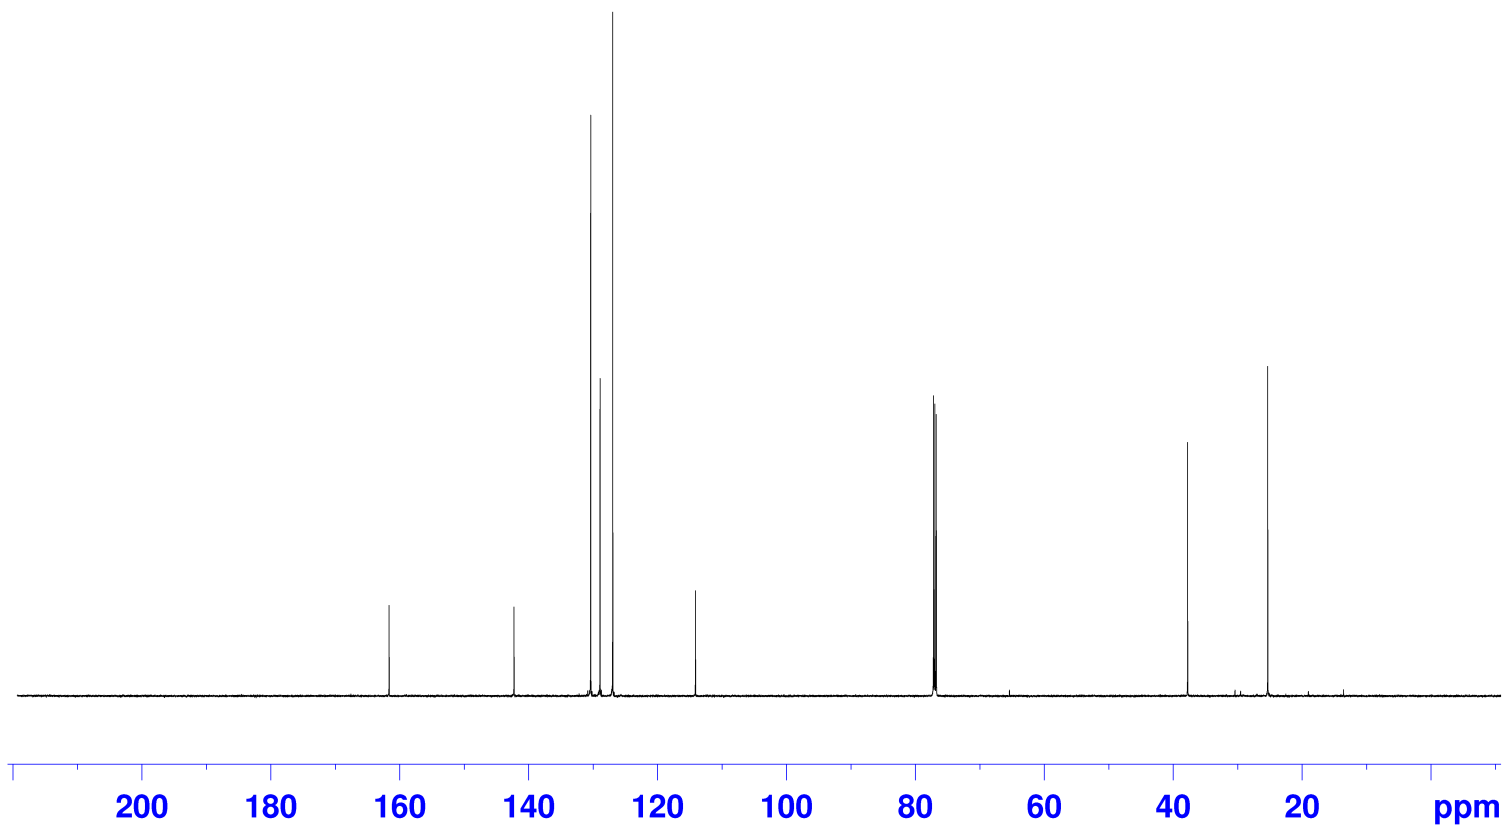



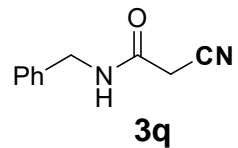

7.362  
7.350  
7.317  
7.291  
7.279  
7.261

4.476  
4.467

3.394

```

NAME      GG-584P-20220613
EXPNO     1
PROCNO    1
Date_     20220613
Time      21.17
INSTRUM   spect
PROBHD    5 mm PABBO BB/
PULPROG   zg30
TD         65536
SOLVENT   CDC13
NS         8
DS         0
SWH       9615.385 Hz
FIDRES    0.146719 Hz
AQ         3.4079220 sec
RG         109.27
DW         52.000 usec
DE         6.50 usec
TE         298.0 K
D1         1.00000000 sec
TD0        1
  
```

```

===== CHANNEL f1 =====
SFO1      600.1739011 MHz
NUC1       1H
P1         9.96 usec
SI         65536
SF         600.1700147 MHz
WDW        EM
SSB        0
LB         0.30 Hz
GB         0
PC         1.00
  
```

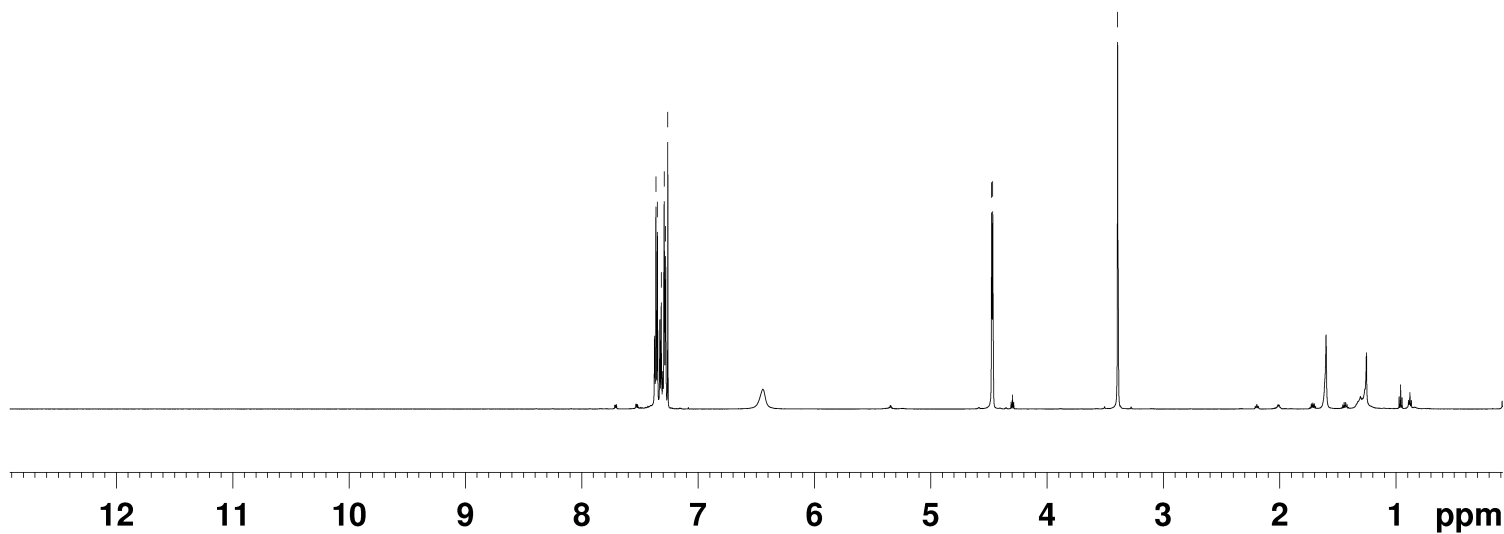

2.05  
1.07  
2.00

0.98

2.05

2.04

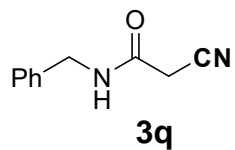

160.77  
160.72

136.77

128.96

128.09

127.97

114.64

44.44

25.84

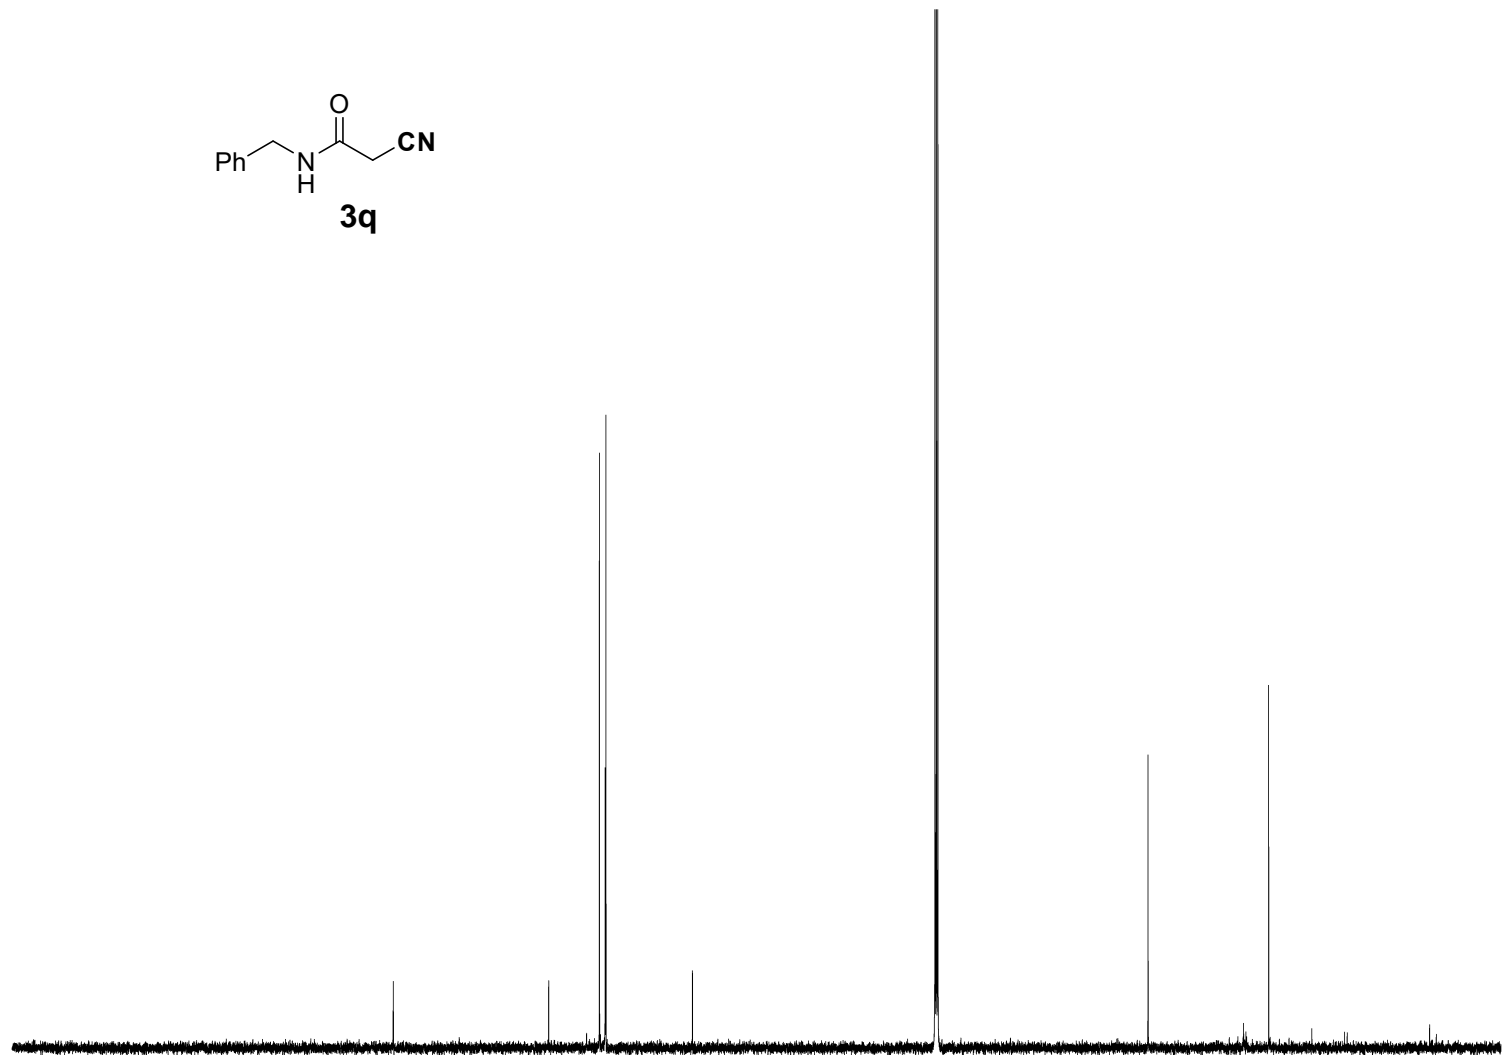

200

180

160

140

120

100

80

60

40

20

ppm

```

NAME      GG-584P-20220613
EXPNO     2
PROCNO    1
Date_     20220613
Time      22.09
INSTRUM   spect
PROBHD    5 mm PABBO BB/
PULPROG   zgpg30
TD         65536
SOLVENT   CDCl3
NS         1024
DS         4
SWH       36057.691 Hz
FIDRES    0.550197 Hz
AQ         0.9088159 sec
RG         190.02
DW         13.867 usec
DE         6.50 usec
TE         298.0 K
D1         2.00000000 sec
D11        0.03000000 sec
TD0        1
  
```

```

===== CHANNEL f1 =====
SFO1    150.9279571 MHz
NUC1     13C
P1       11.90 usec
SI       32768
SF       150.9128665 MHz
WDW      EM
SSB      0
LB       1.00 Hz
GB       0
PC       1.40
  
```

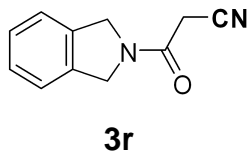

8.022  
 8.009  
 7.271  
 7.259  
 7.206  
 7.194  
 7.181  
 7.061  
 7.049  
 7.037

4.181  
 4.059  
 4.045  
 4.031  
 3.175  
 3.160  
 3.146

```

NAME      GG-610P-20230202
EXPNO     1
PROCNO    1
Date_     20230202
Time      17.22
INSTRUM   spect
PROBHD    5 mm PABBO BB/
PULPROG   zg30
TD         65536
SOLVENT   DMSO
NS         8
DS         0
SWH        9615.385 Hz
FIDRES     0.146719 Hz
AQ         3.4079220 sec
RG         96.28
DW         52.000 usec
DE         6.50 usec
TE         298.0 K
D1         1.00000000 sec
TD0        1
  
```

```

===== CHANNEL f1 =====
SFO1      600.1739011 MHz
NUC1       1H
P1         9.96 usec
SI         65536
SF         600.1700000 MHz
WDW        EM
SSB        0
LB         0.30 Hz
GB         0
PC         1.00
  
```

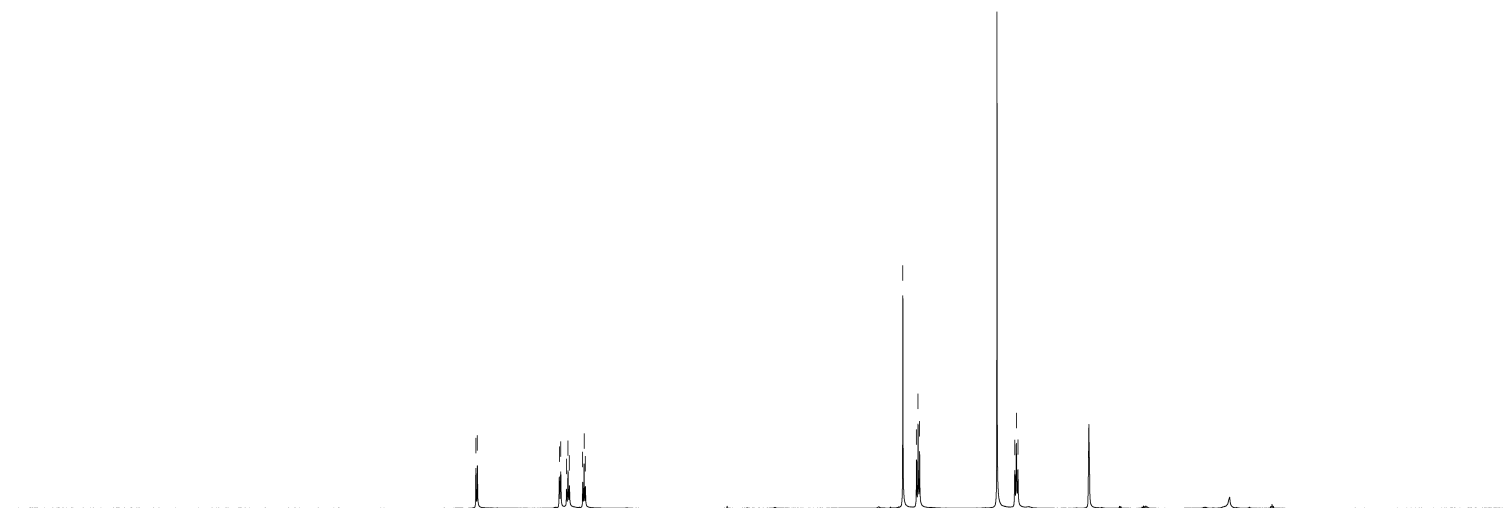

12 11 10 9 8 7 6 5 4 3 2 1 0 ppm

1.00  
 1.01  
 1.05  
 1.07

2.10  
 2.18  
 2.12

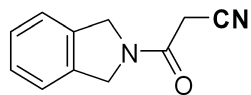

**3r**

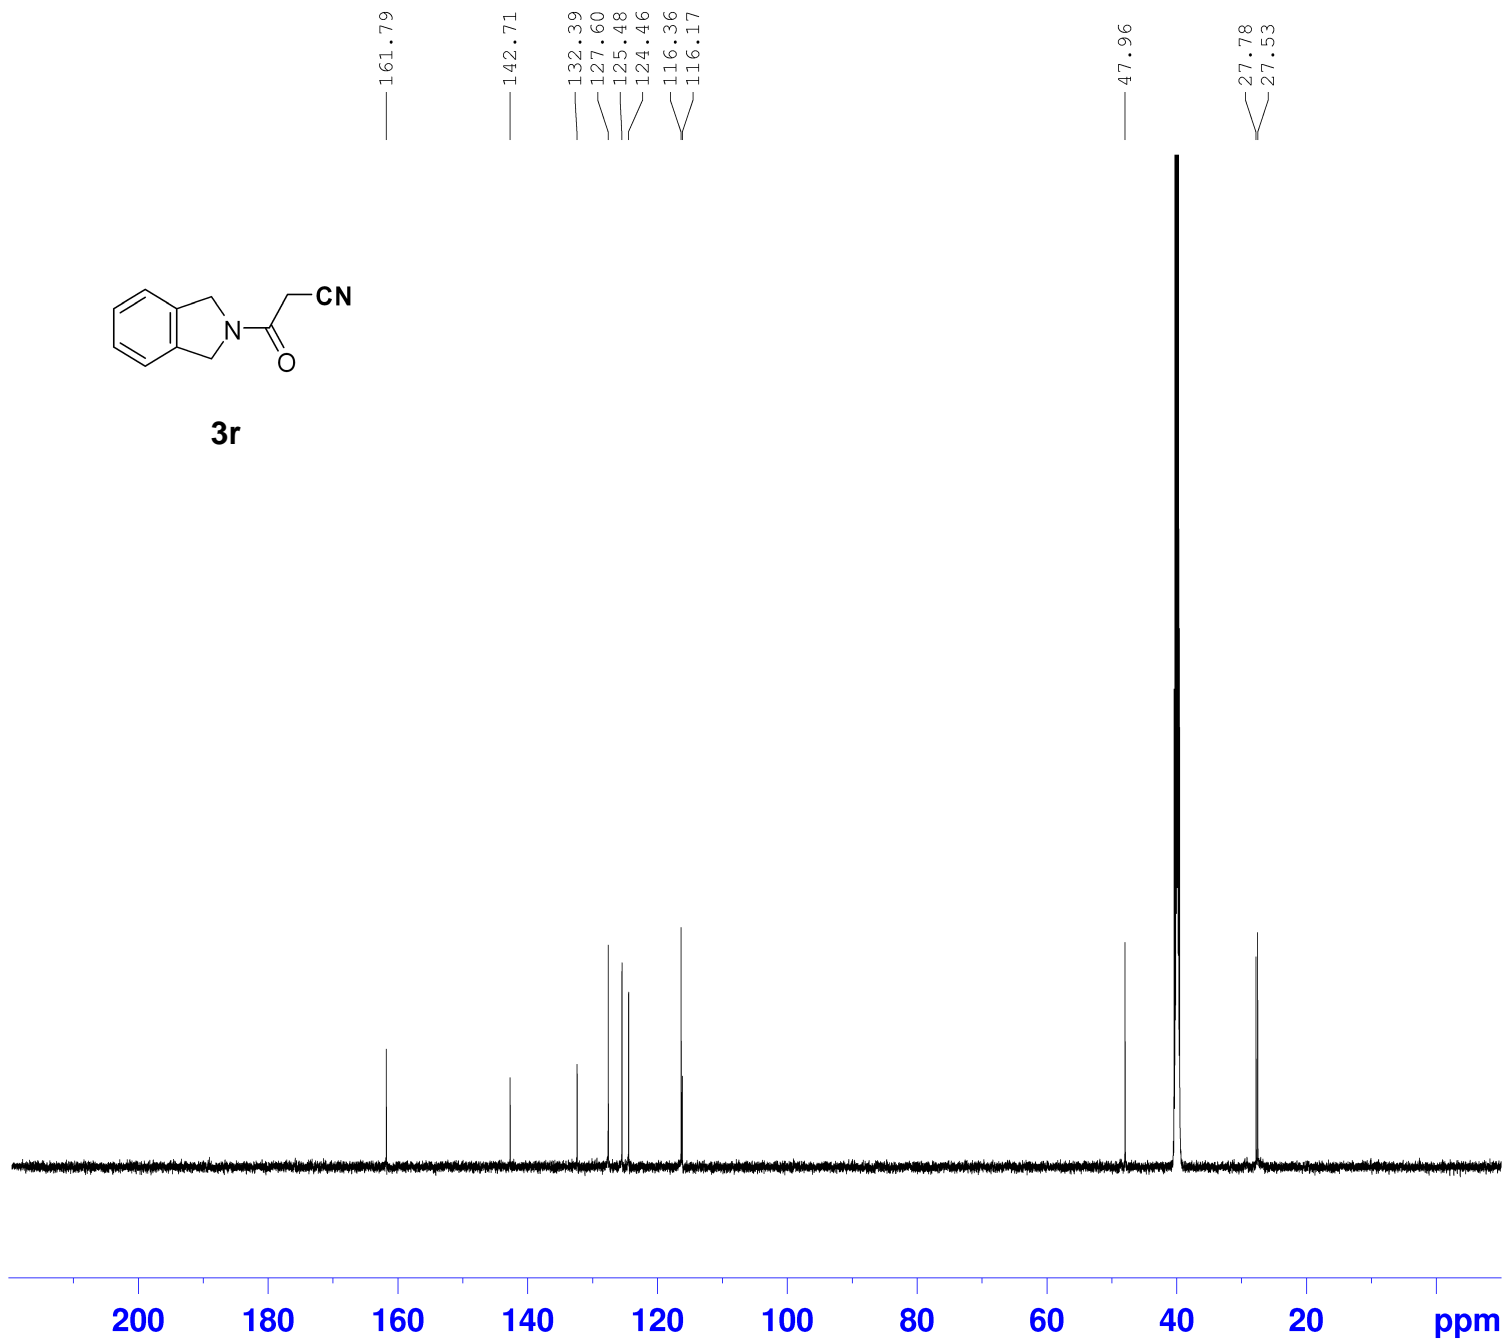

— 161.79  
 — 142.71  
 — 132.39  
 — 127.60  
 — 125.48  
 — 124.46  
 — 116.36  
 — 116.17  
 — 47.96  
 — 27.78  
 — 27.53

```

NAME      GG-610P-20230202
EXPNO     2
PROCNO    1
Date_     20230202
Time      18.14
INSTRUM   spect
PROBHD    5 mm PABBO BB/
PULPROG   zgpg30
TD         65536
SOLVENT   DMSO
NS         1024
DS         4
SWH       36057.691 Hz
FIDRES    0.550197 Hz
AQ         0.9088159 sec
RG         190.02
DW         13.867 usec
DE         6.50 usec
TE         298.0 K
D1         2.00000000 sec
D11        0.03000000 sec
TD0        1
  
```

```

===== CHANNEL f1 =====
SFO1      150.9279571 MHz
NUC1       13C
P1         11.90 usec
SI         32768
SF         150.9128665 MHz
WDW        EM
SSB         0
LB          1.00 Hz
GB          0
PC          1.40
  
```

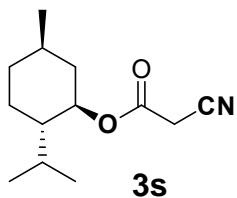

4.795  
4.788  
4.777  
4.769  
4.759  
4.751  
3.442  
3.440  
2.035  
2.033  
2.027  
2.023  
2.020  
2.016  
2.013  
2.008  
2.003  
2.000  
1.881  
1.876  
1.869  
1.865  
1.857  
1.853  
1.846  
1.841  
1.834  
1.830  
1.724  
1.719  
1.713  
1.709  
1.695  
1.691  
1.519  
1.514  
1.509  
1.505  
1.500  
1.494  
1.489  
1.483

```

NAME      GG-682-1P-20221015
EXPNO    1
PROCNO   1
Date_    20221015
Time     15.38
INSTRUM  spect
PROBHD   5 mm PABBO BB/
PULPROG  zg30
TD       65536
SOLVENT  CDCl3
NS       8
DS       0
SWH      9615.385 Hz
FIDRES   0.146719 Hz
AQ       3.4079220 sec
RG       15.49
DW       52.000 usec
DE       6.50 usec
TE       298.0 K
D1       1.00000000 sec
TD0      1
  
```

```

===== CHANNEL f1 =====
SFO1    600.1739011 MHz
NUC1     1H
P1       9.96 usec
SI       65536
SF       600.1700043 MHz
WDW      EM
SSB      0
LB       0.30 Hz
GB       0
PC       1.00
  
```

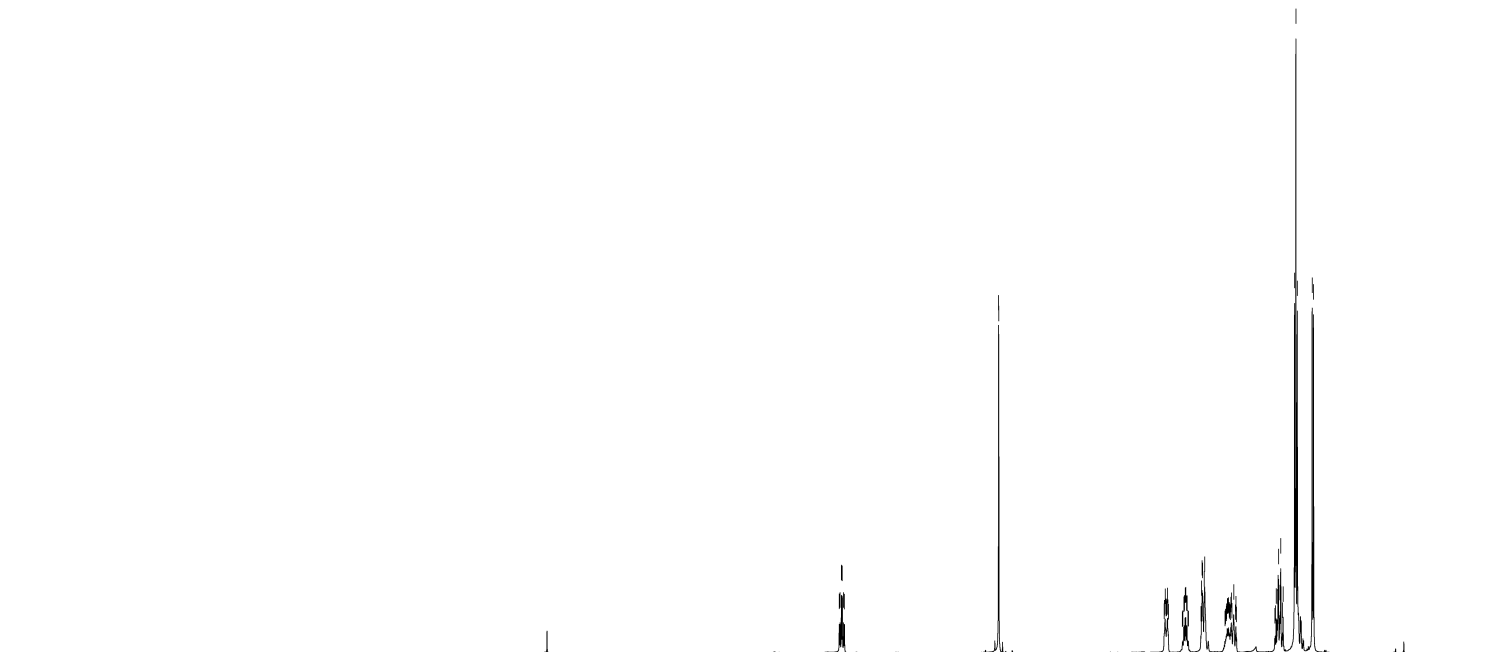

11 10 9 8 7 6 5 4 3 2 1 0 ppm

1.02

2.00

1.05

1.03

2.08

2.07

2.10

7.09

3.03

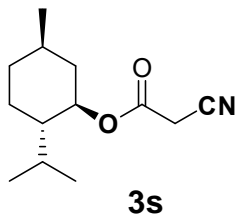

— 162.48

— 113.18

— 77.51

— 46.75  
 — 40.48  
 — 33.98  
 — 31.38  
 — 26.27  
 — 24.97  
 — 23.30  
 — 21.91  
 — 20.70  
 — 16.23

```

NAME      GG-682-1P-20221015
EXPNO     2
PROCNO    1
Date_     20221015
Time      16.30
INSTRUM   spect
PROBHD    5 mm PABBO BB/
PULPROG   zgpg30
TD        65536
SOLVENT   CDC13
NS        1024
DS        4
SWH       36057.691 Hz
FIDRES    0.550197 Hz
AQ        0.9088159 sec
RG        190.02
DW        13.867 usec
DE        6.50 usec
TE        298.0 K
D1        2.00000000 sec
D11       0.03000000 sec
TD0       1
  
```

```

===== CHANNEL f1 =====
SFO1     150.9279571 MHz
NUC1     13C
P1       11.90 usec
SI       32768
SF       150.9128665 MHz
WDW      EM
SSB      0
LB       1.00 Hz
GB       0
PC       1.40
  
```

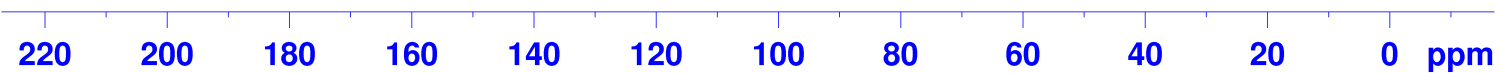

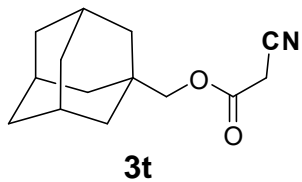

3.803  
3.478  
2.002  
1.748  
1.728  
1.666  
1.647  
1.549

```

NAME      GG-594P-20220616
EXPNO     1
PROCNO    1
Date_     20220616
Time      11.02
INSTRUM   spect
PROBHD    5 mm PABBO BB/
PULPROG   zg30
TD         65536
SOLVENT   CDC13
NS         8
DS         0
SWH        9615.385 Hz
FIDRES     0.146719 Hz
AQ         3.4079220 sec
RG         15.49
DW         52.000 usec
DE         6.50 usec
TE         298.0 K
D1         1.00000000 sec
TD0        1
  
```

```

===== CHANNEL f1 =====
SFO1      600.1739011 MHz
NUC1       1H
P1         9.96 usec
SI         65536
SF         600.1700061 MHz
WDW        EM
SSB        0
LB         0.30 Hz
GB         0
PC         1.00
  
```

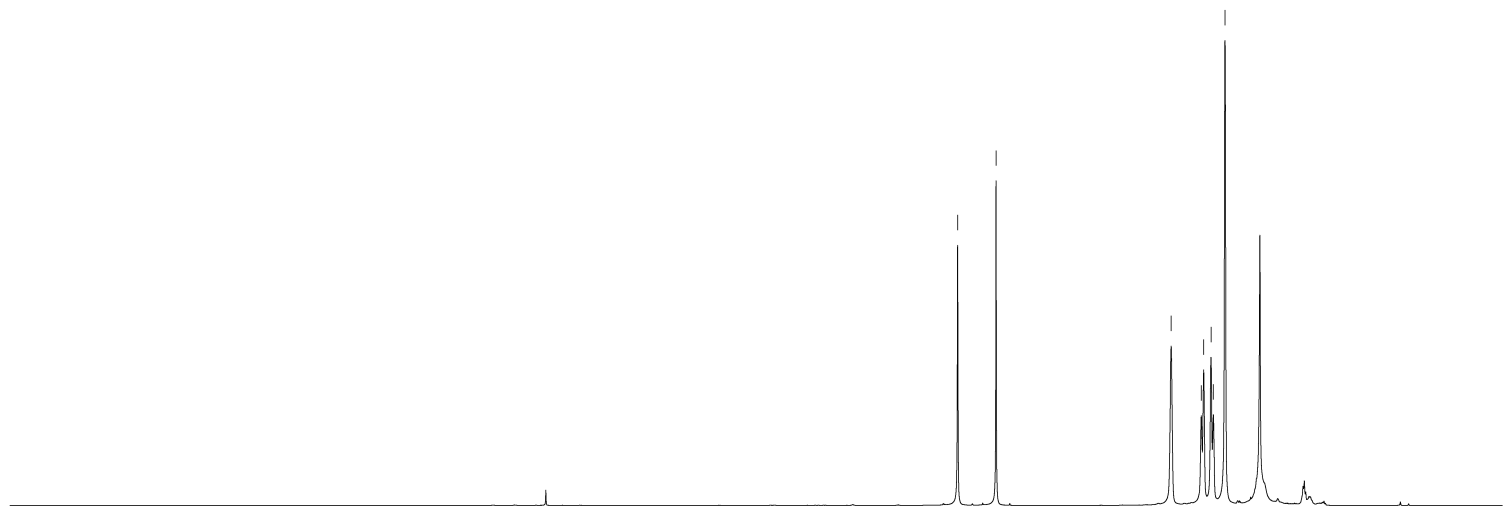

11 10 9 8 7 6 5 4 3 2 1 0 ppm

2.00  
1.95  
3.02  
3.07  
3.12  
6.05

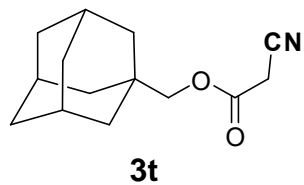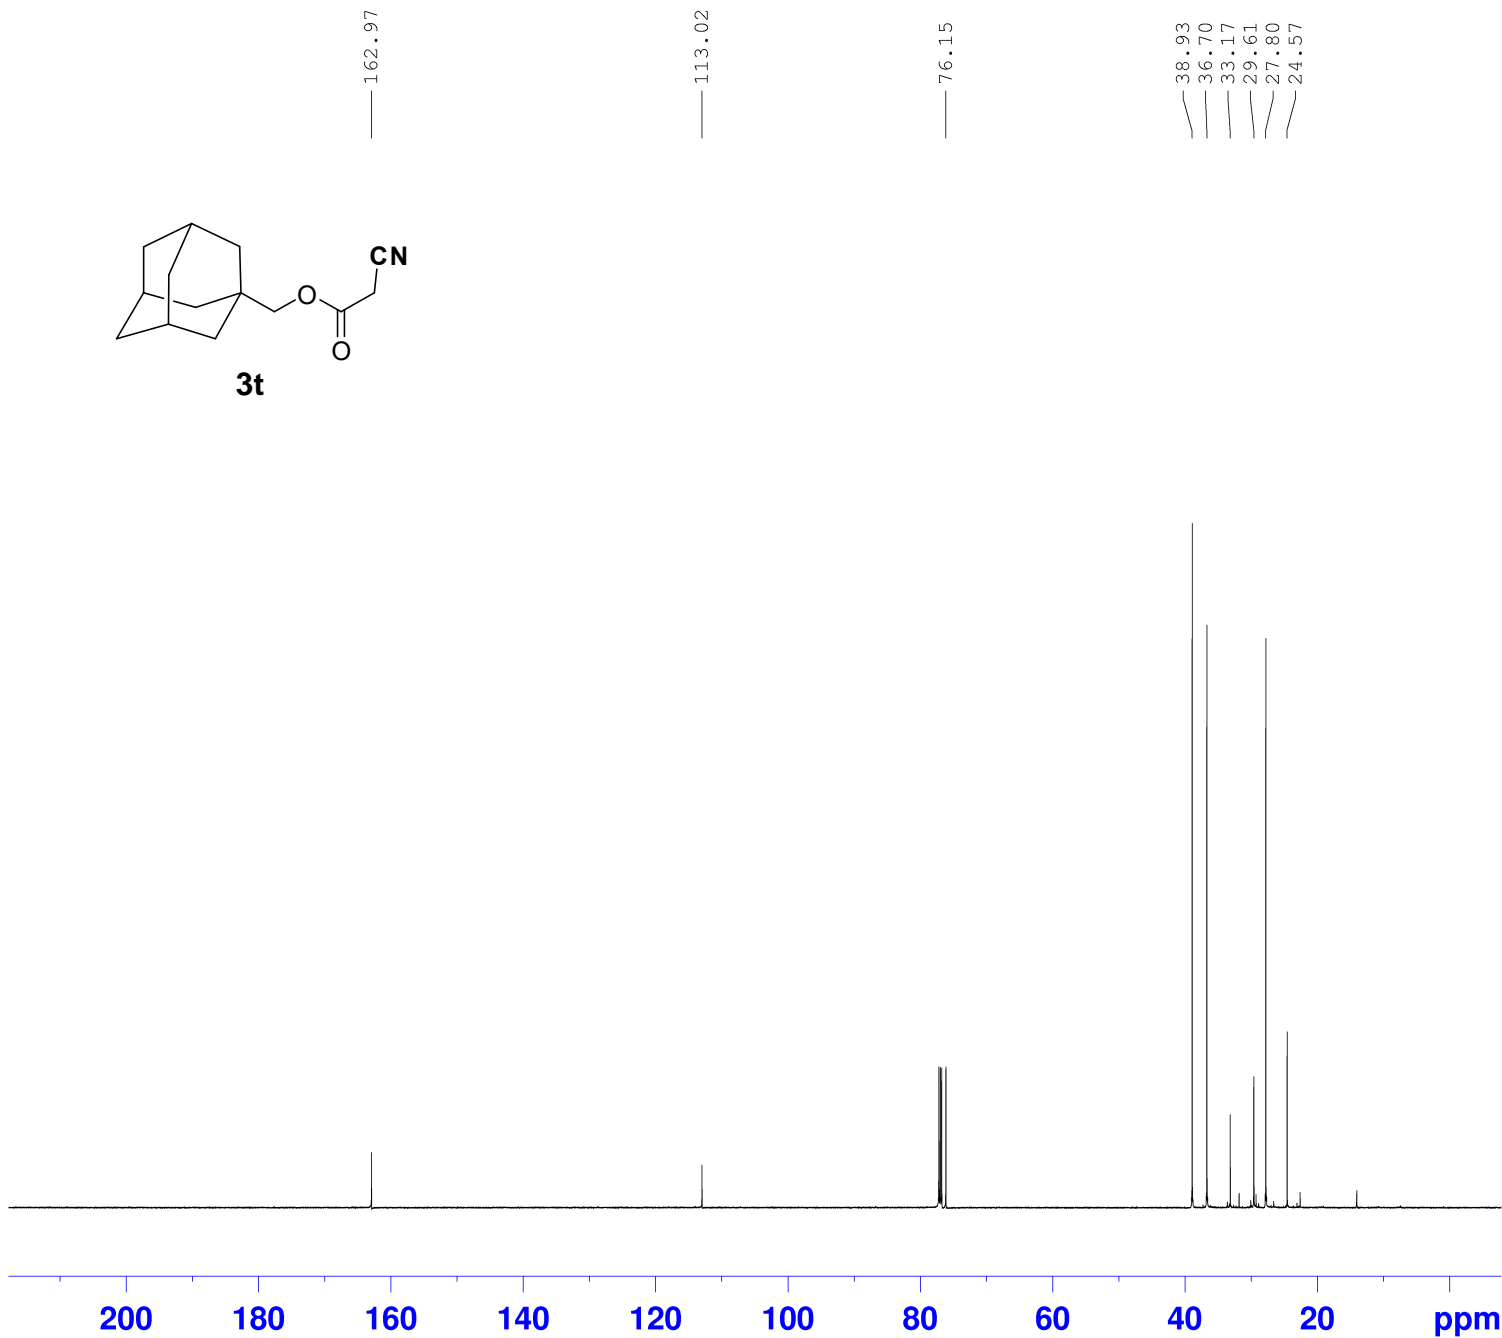

```

NAME      GG-594P-20220616
EXPNO     2
PROCNO    1
Date_     20220616
Time      11.54
INSTRUM   spect
PROBHD    5 mm PABBO BB/
PULPROG   zgpg30
TD         65536
SOLVENT   CDC13
NS         1024
DS         4
SWH       36057.691 Hz
FIDRES    0.550197 Hz
AQ        0.9088159 sec
RG         190.02
DW         13.867 usec
DE         6.50 usec
TE         298.0 K
D1         2.0000000 sec
D11        0.0300000 sec
TD0        1
  
```

```

===== CHANNEL f1 =====
SF01    150.9279571 MHz
NUC1     13C
P1       11.90 usec
SI       32768
SF       150.9128796 MHz
WDW      EM
SSB      0
LB       1.00 Hz
GB       0
PC       1.40
  
```



4.786  
3.415  
1.976  
1.954  
1.832  
1.768  
1.746  
1.647  
1.579  
1.566  
1.561  
1.552  
1.545  
1.531  
1.524  
1.513  
1.502  
1.461  
1.456  
1.440  
1.421  
1.363  
1.358  
1.346  
1.338  
1.334  
1.329  
1.322  
1.311  
1.304  
1.295  
1.289  
1.282  
1.274  
1.267  
1.258  
1.244  
1.238  
1.222  
1.159  
1.156  
1.141  
1.134  
1.126  
1.119  
1.114  
1.107  
1.098  
1.083  
1.067  
1.036  
1.026  
1.017  
1.004  
0.994  
0.988  
0.976  
0.902  
0.891  
0.879  
0.869  
0.865  
0.858  
0.854  
0.826  
0.647

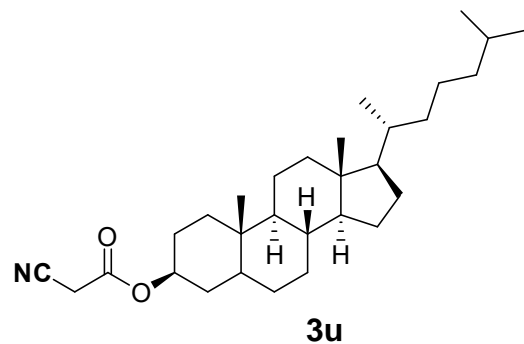

NAME GG-663-1P-20220916  
EXPNO 1  
PROCNO 1  
Date\_ 20220916  
Time 10.59  
INSTRUM spect  
PROBHD 5 mm PABBO BB/  
PULPROG zg30  
TD 65536  
SOLVENT CDCl3  
NS 8  
DS 0  
SWH 9615.385 Hz  
FIDRES 0.146719 Hz  
AQ 3.4079220 sec  
RG 44.5  
DW 52.000 usec  
DE 6.50 usec  
TE 298.0 K  
D1 1.00000000 sec  
TD0 1

==== CHANNEL f1 =====  
SFO1 600.1739011 MHz  
NUC1 1H  
P1 9.96 usec  
SI 65536  
SF 600.1700128 MHz  
WDW EM  
SSB 0  
LB 0.30 Hz  
GB 0  
PC 1.00

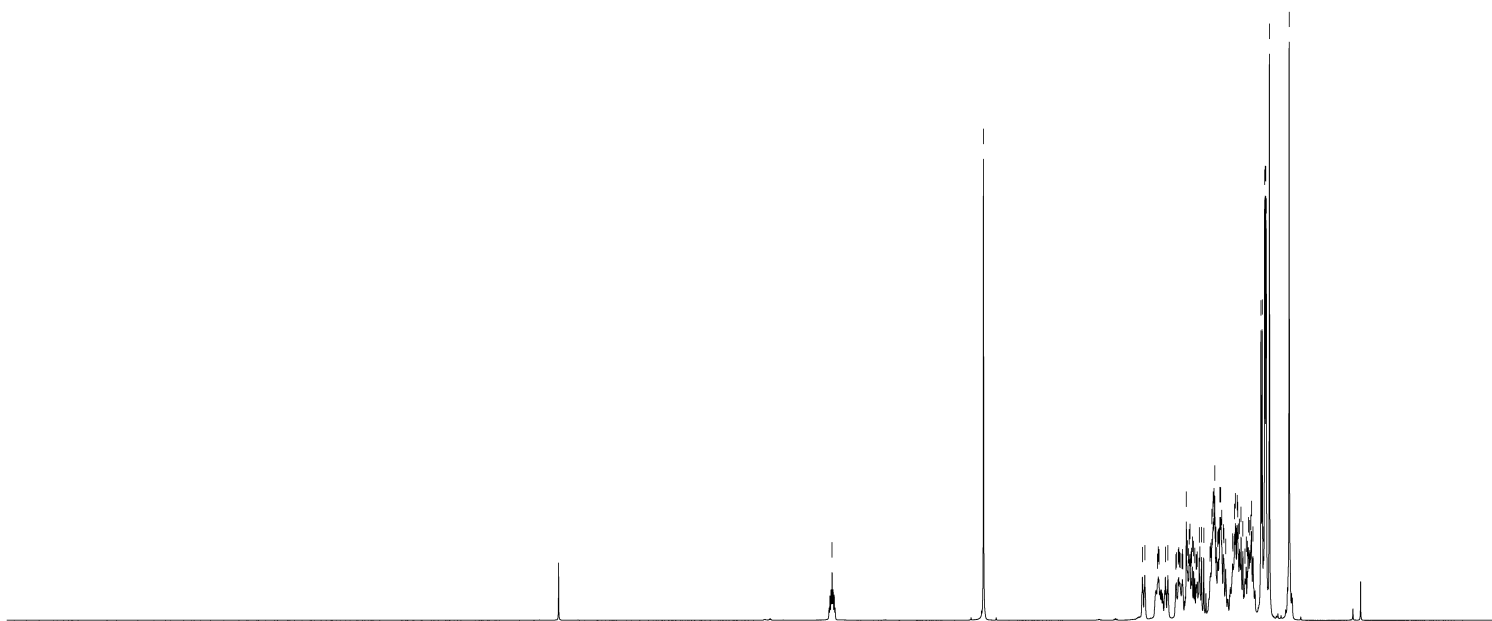

12 11 10 9 8 7 6 5 4 3 2 1 0 ppm

1.00  
2.01  
1.02  
3.08  
8.08  
9.09  
10.09  
3.07  
6.07  
3.10  
3.06

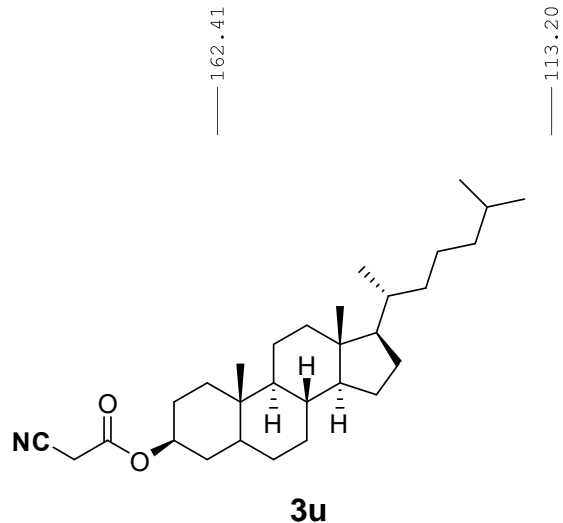

162.41

113.20

56.39  
56.27  
54.16  
44.60  
42.59  
39.95  
39.52  
36.61  
36.17  
35.80  
35.44  
35.42  
33.69  
31.94  
28.55  
28.24  
28.02  
27.21  
25.08  
24.20  
23.84  
22.83  
22.57  
21.21  
18.68

NAME GG-663-1P-20220916  
EXPNO 2  
PROCNO 1  
Date\_ 20220916  
Time 11.51  
INSTRUM spect  
PROBHD 5 mm PABBO BB/  
PULPROG zgpg30  
TD 65536  
SOLVENT CDC13  
NS 1024  
DS 4  
SWH 36057.691 Hz  
FIDRES 0.550197 Hz  
AQ 0.9088159 sec  
RG 190.02  
DW 13.867 usec  
DE 6.50 usec  
TE 298.0 K  
D1 2.0000000 sec  
D11 0.03000000 sec  
TD0 1

===== CHANNEL f1 =====  
SFO1 150.9279571 MHz  
NUC1 13C  
P1 11.90 usec  
SI 32768  
SF 150.9128665 MHz  
WDW EM  
SSB 0  
LB 1.00 Hz  
GB 0  
PC 1.40

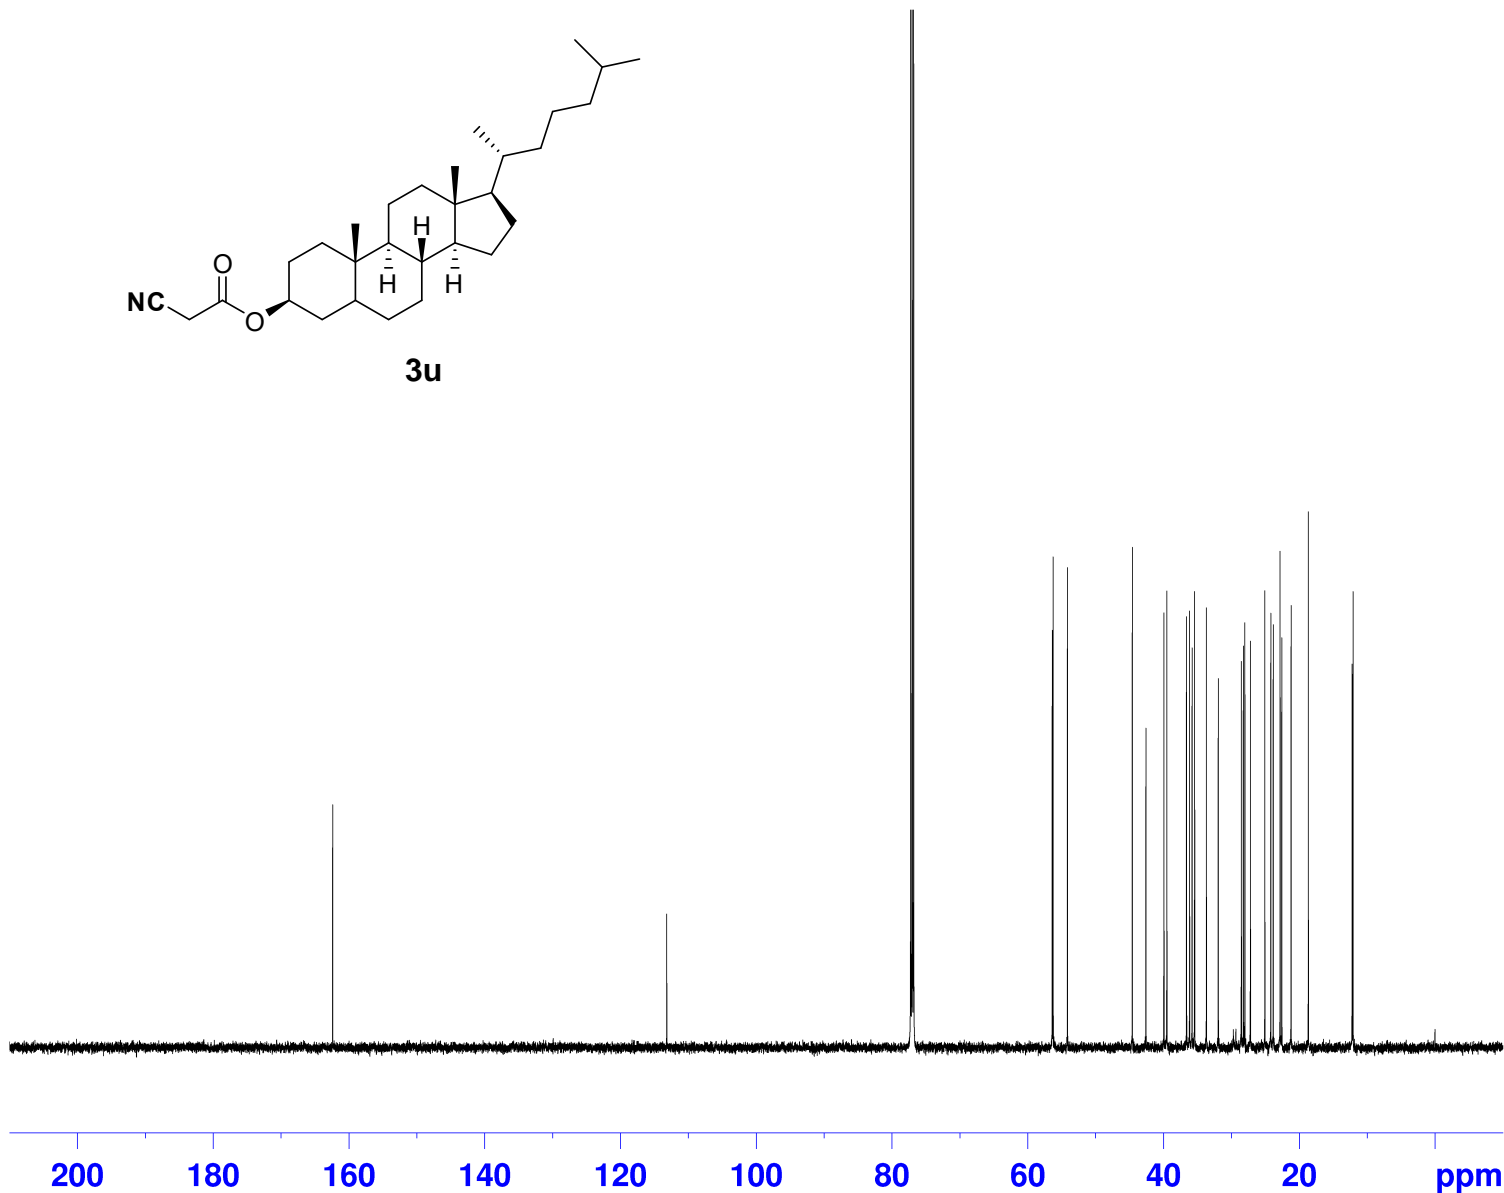

4.790  
2.459  
2.445  
2.427  
2.413  
2.083  
2.067  
2.051  
1.819  
1.813  
1.808  
1.803  
1.797  
1.792  
1.787  
1.781  
1.771  
1.765  
1.676  
1.671  
1.667  
1.660  
1.655  
1.651  
1.646  
1.639  
1.634  
1.585  
1.579  
1.566  
1.560  
1.548  
1.544  
1.538  
1.523  
1.502  
1.482  
1.462  
1.442  
1.356  
1.350  
1.342  
1.335  
1.329  
1.319  
1.314  
1.308  
1.299  
1.292  
1.286  
1.281  
1.278  
1.271  
1.264  
1.259  
1.253  
1.251  
1.243  
1.237  
1.225  
1.221  
1.210  
1.205  
0.860  
0.723  
0.718

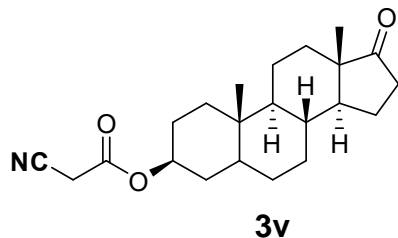

NAME GG-608P-20220621  
EXPNO 1  
PROCNO 1  
Date\_ 20220621  
Time 21.42  
INSTRUM spect  
PROBHD 5 mm PABBO BB/  
PULPROG zg30  
TD 65536  
SOLVENT CDCl3  
NS 8  
DS 0  
SWH 9615.385 Hz  
FIDRES 0.146719 Hz  
AQ 3.4079220 sec  
RG 28.69  
DW 52.000 usec  
DE 6.50 usec  
TE 298.0 K  
D1 1.00000000 sec  
TD0 1

===== CHANNEL f1 =====  
SFO1 600.1739011 MHz  
NUC1 1H  
P1 9.96 usec  
SI 65536  
SF 600.1699974 MHz  
WDW EM  
SSB 0  
LB 0.30 Hz  
GB 0  
PC 1.00

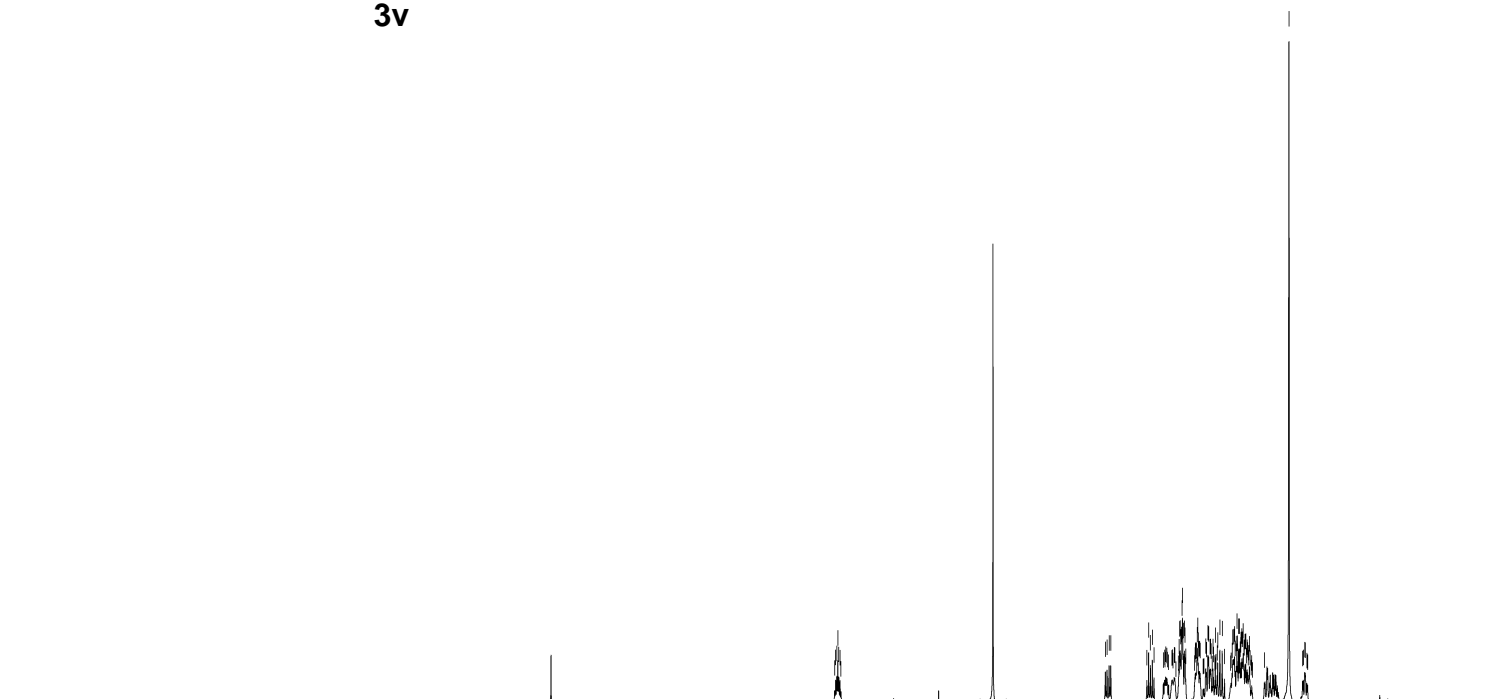

11 10 9 8 7 6 5 4 3 2 1 0 ppm

1.00  
2.00  
1.01  
1.02  
2.09  
3.08  
2.03  
4.10  
6.05  
2.07  
6.04  
1.05

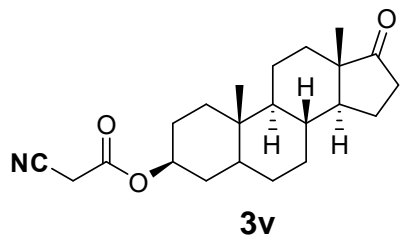

162.35

113.12

54.12  
51.22  
47.65  
44.47  
36.44  
35.72  
35.49  
34.88  
33.48  
31.39  
30.64  
28.09  
27.02  
24.95  
21.66  
20.36  
13.71  
12.10

```

NAME      GG-608P-20220621
EXPNO     2
PROCNO    1
Date_     20220621
Time      22.34
INSTRUM   spect
PROBHD    5 mm PABBO BB/
PULPROG   zgpg30
TD         65536
SOLVENT   CDC13
NS         1024
DS         4
SWH        36057.691 Hz
FIDRES     0.550197 Hz
AQ         0.9088159 sec
RG         190.02
DW         13.867 usec
DE         6.50 usec
TE         298.4 K
D1         2.00000000 sec
D11        0.03000000 sec
TD0        1
  
```

```

===== CHANNEL f1 =====
SF01      150.9279571 MHz
NUC1       13C
P1         11.90 usec
SI         32768
SF         150.9128811 MHz
WDW        EM
SSB        0
LB         1.00 Hz
GB         0
PC         1.40
  
```

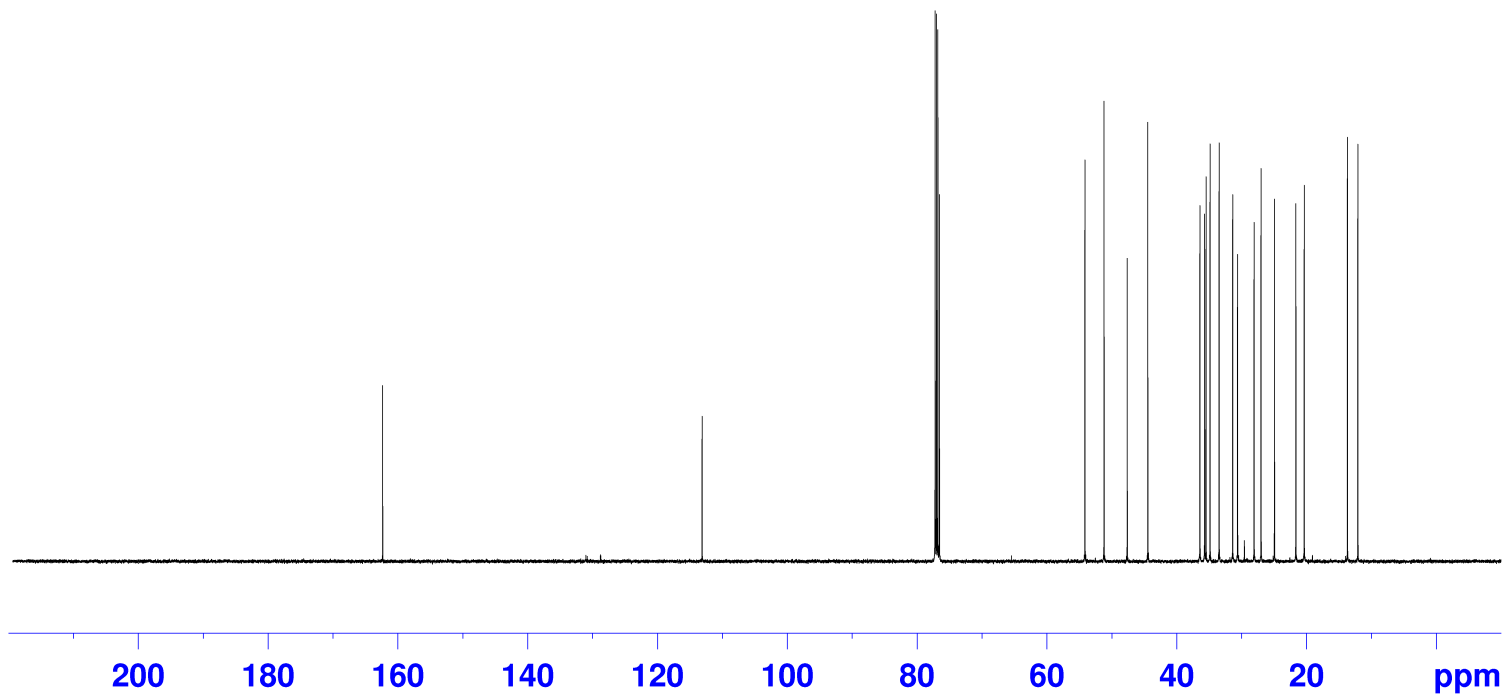

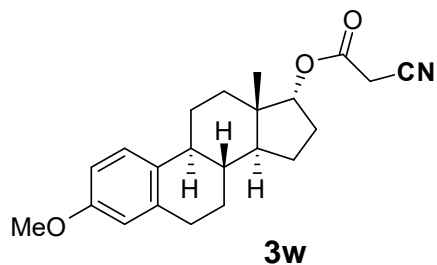

7.202  
7.181  
6.723  
6.717  
6.702  
6.696  
6.631  
4.791  
4.770  
4.749  
3.773  
3.461  
2.881  
2.858  
2.844  
2.324  
2.313  
2.285  
2.260  
2.236  
2.214  
2.191  
1.925  
1.917  
1.896  
1.875  
1.869  
1.807  
1.785  
1.776  
1.767  
1.744  
1.670  
1.662  
1.641  
1.634  
1.597  
1.533  
1.500  
1.478  
1.461  
1.431  
1.410  
1.400

```

NAME      gg-607-20220620
EXPNO     1
PROCNO    1
Date_     20220620
Time      20.59
INSTRUM   spect
PROBHD    5 mm PABBO BB-
PULPROG   zg30
TD         32768
SOLVENT   CDC13
NS         8
DS         0
SWH        6393.862 Hz
FIDRES     0.195125 Hz
AQ         2.5625076 sec
RG         203
DW         78.200 usec
DE         6.50 usec
TE         298.2 K
D1         1.00000000 sec
TD0        1
  
```

```

===== CHANNEL f1 =====
NUC1      1H
P1         10.40 usec
PL1        -1.00 dB
PL1W      17.01305389 W
SFO1      400.1326008 MHz
SI         32768
SF         400.1300113 MHz
WDW        EM
SSB         0
LB         0.30 Hz
GB         0
PC         1.00
  
```

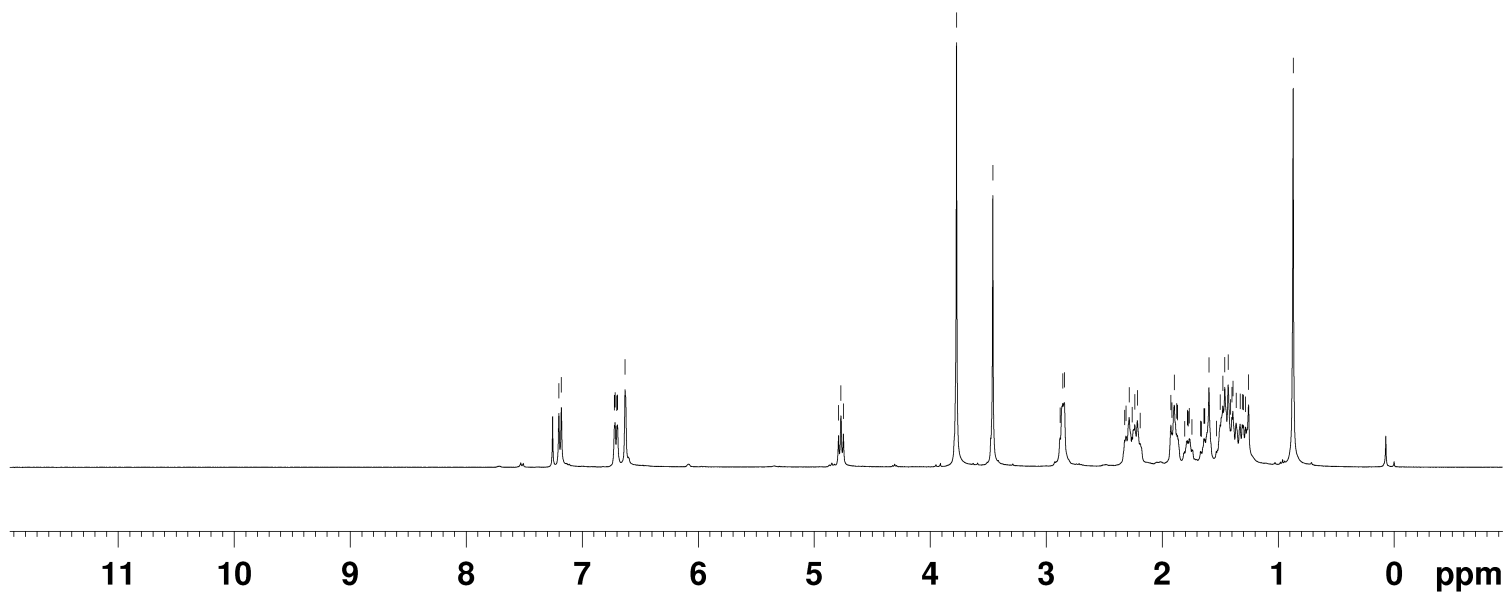

0.91  
0.98  
0.95  
1.01  
3.07  
2.00  
2.08  
3.12  
2.06  
1.02  
2.01  
5.24  
3.08

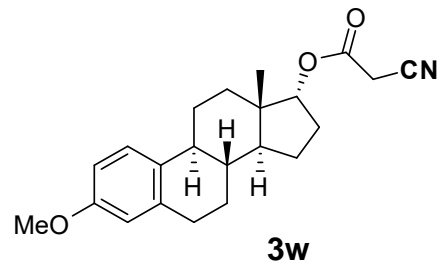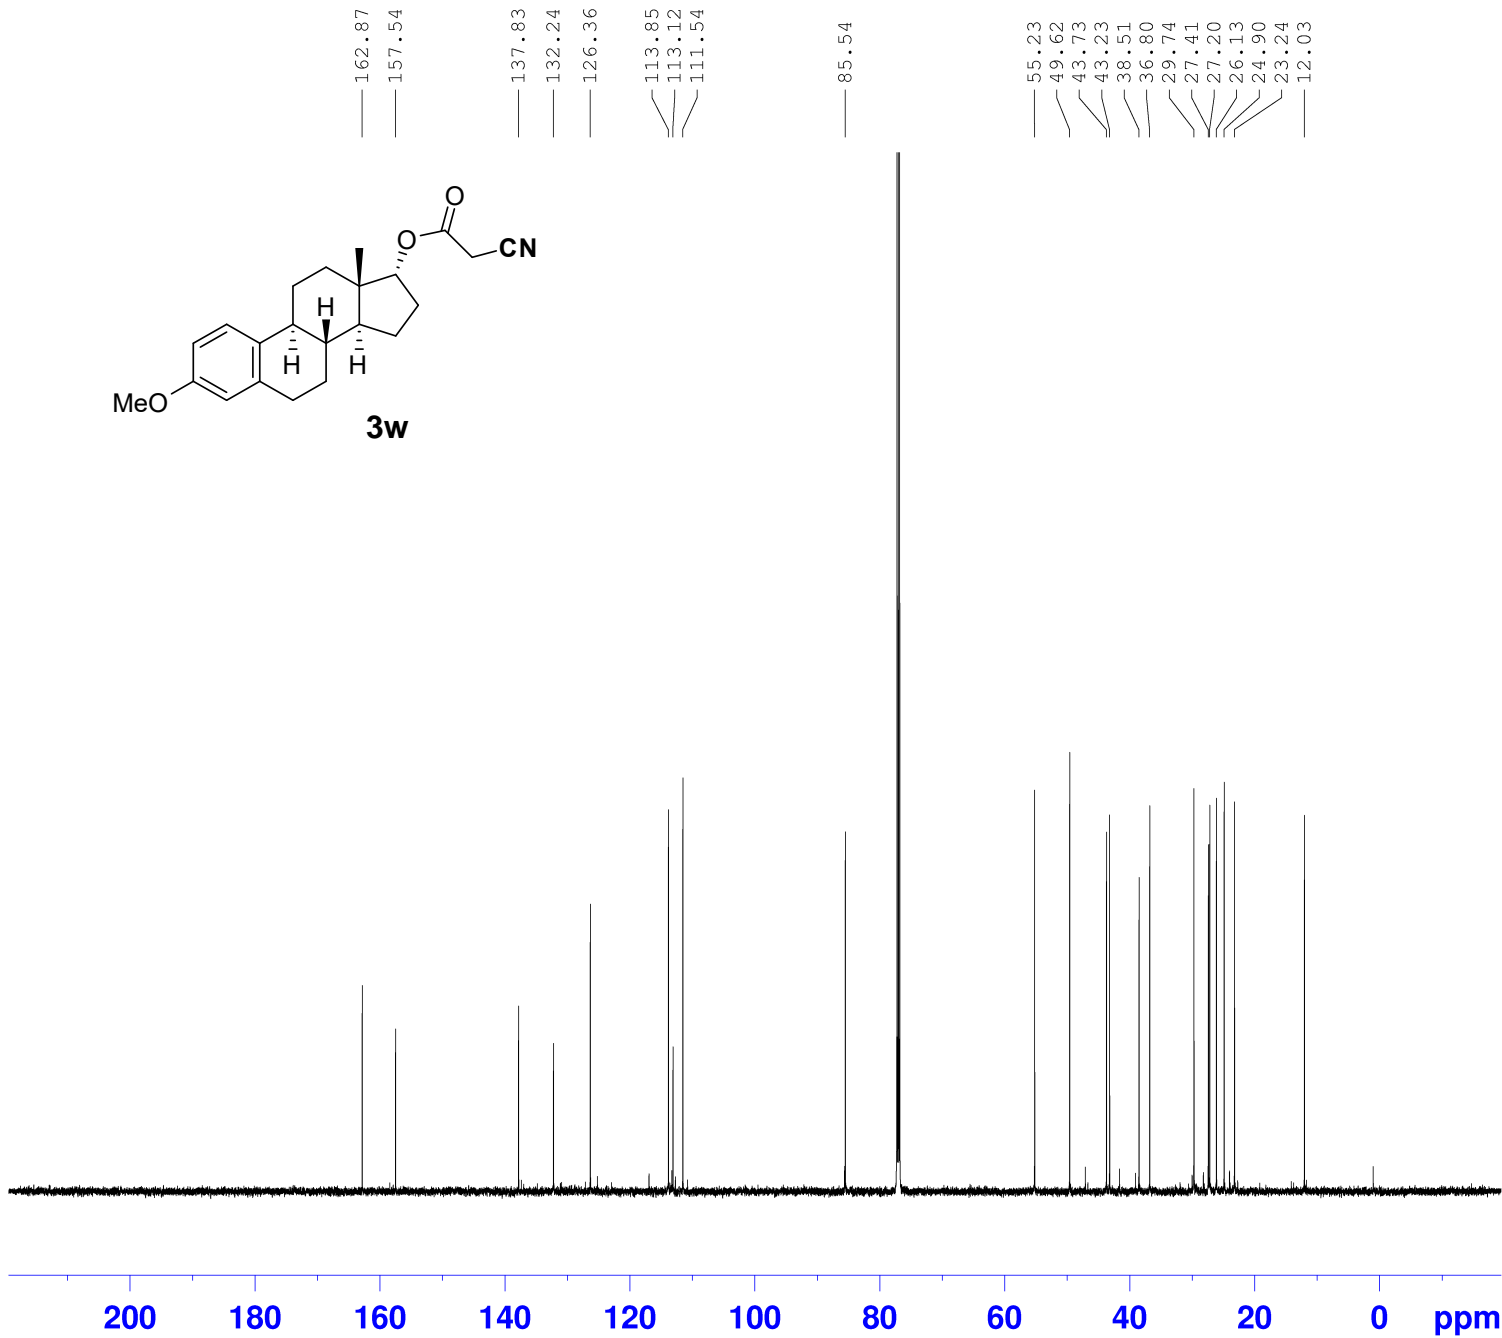

```

NAME      GG-607P-20220621
EXPNO     2
PROCNO    1
Date_     20220621
Time      23.34
INSTRUM   spect
PROBHD    5 mm PABBO BB/
PULPROG   zgpg30
TD         65536
SOLVENT   CDC13
NS         1024
DS         4
SWH        36057.691 Hz
FIDRES     0.550197 Hz
AQ         0.9088159 sec
RG         190.02
DW         13.867 usec
DE         6.50 usec
TE         298.3 K
D1         2.00000000 sec
D11        0.03000000 sec
TD0        1
  
```

```

===== CHANNEL f1 =====
SF01      150.9279571 MHz
NUC1       13C
P1         11.90 usec
SI         32768
SF         150.9128665 MHz
WDW        EM
SSB        0
LB         1.00 Hz
GB         0
PC         1.40
  
```

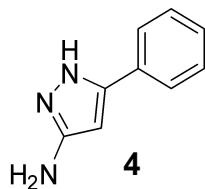

7.673  
7.660  
7.386  
7.373  
7.361  
7.273  
7.261  
7.249

5.791

```

NAME      GG-711P-20230202
EXPNO     1
PROCNO    1
Date_     20230202
Time      16.21
INSTRUM   spect
PROBHD    5 mm PABBO BB/
PULPROG   zg30
TD         65536
SOLVENT   DMSO
NS         8
DS         0
SWH       9615.385 Hz
FIDRES    0.146719 Hz
AQ         3.4079220 sec
RG         38.1
DW         52.000 usec
DE         6.50 usec
TE         298.0 K
D1         1.00000000 sec
TD0        1
  
```

```

===== CHANNEL f1 =====
SFO1      600.1739011 MHz
NUC1       1H
P1         9.96 usec
SI         65536
SF         600.1700000 MHz
WDW        EM
SSB        0
LB         0.30 Hz
GB         0
PC         1.00
  
```

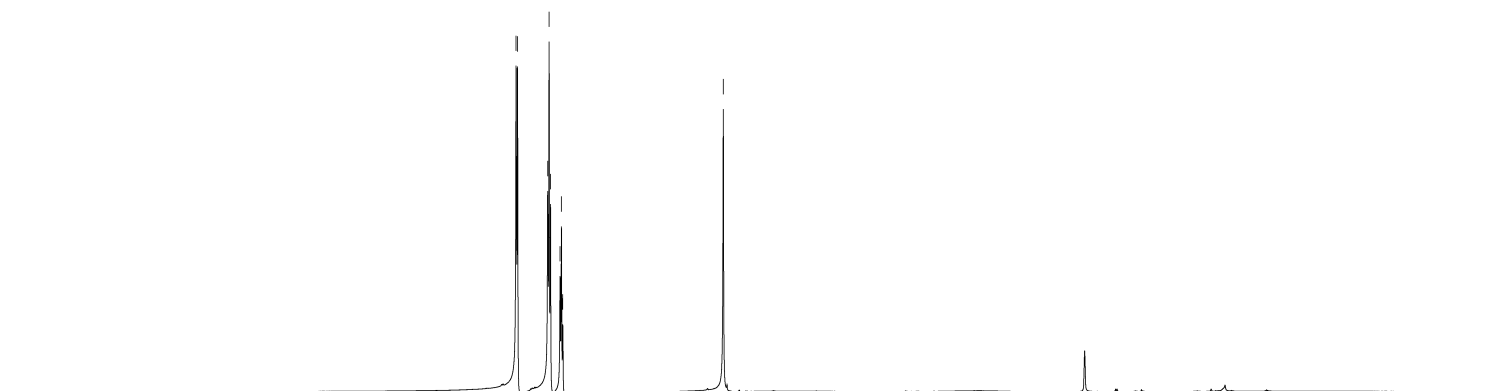

12 11 10 9 8 7 6 5 4 3 2 1 0 ppm

2.08  
2.04  
0.95

1.00

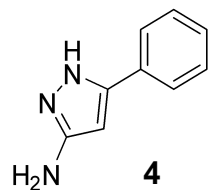

153.62  
 145.97  
 132.49  
 129.07  
 127.69  
 125.18  
 87.83

```

NAME      GG-711P-20230202
EXPNO     2
PROCNO    1
Date_     20230202
Time      17.14
INSTRUM   spect
PROBHD    5 mm PABBO BB/
PULPROG   zgpg30
TD        65536
SOLVENT   DMSO
NS        1024
DS        4
SWH       36057.691 Hz
FIDRES    0.550197 Hz
AQ        0.9088159 sec
RG        190.02
DW        13.867 usec
DE        6.50 usec
TE        298.0 K
D1        2.0000000 sec
D11       0.0300000 sec
TD0       1
  
```

```

===== CHANNEL f1 =====
SFO1     150.9279571 MHz
NUC1     13C
P1       11.90 usec
SI       32768
SF       150.9128665 MHz
WDW      EM
SSB      0
LB       1.00 Hz
GB       0
PC       1.40
  
```

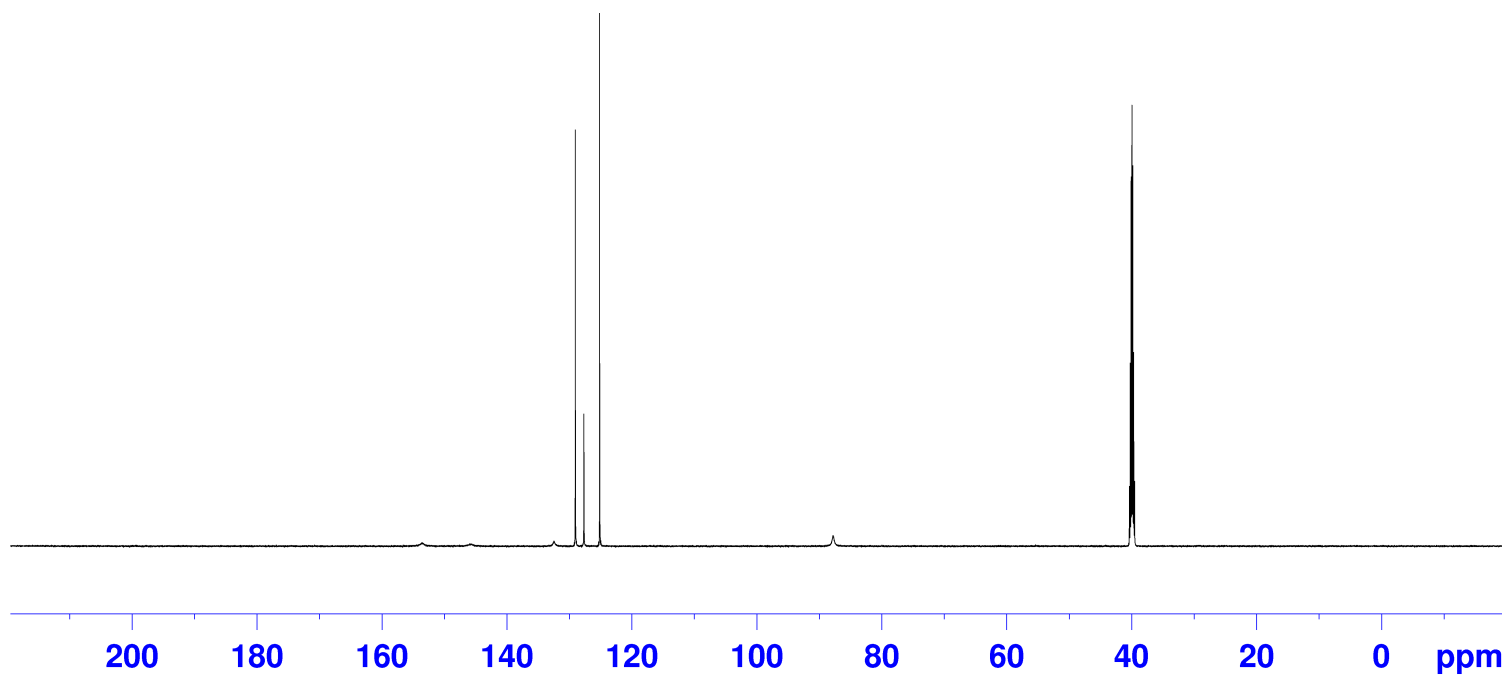



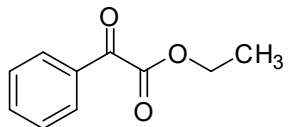

5

8.012  
8.000  
7.661  
7.649  
7.636  
7.518  
7.505  
7.492

4.467  
4.455  
4.443  
4.431

1.427  
1.415  
1.403

```

NAME      GG-713P-20221111
EXPNO     1
PROCNO    1
Date_     20221111
Time      17.31
INSTRUM   spect
PROBHD    5 mm PABBO BB/
PULPROG   zg30
TD        65536
SOLVENT   CDC13
NS         8
DS         0
SWH       9615.385 Hz
FIDRES    0.146719 Hz
AQ        3.4079220 sec
RG         15.49
DW        52.000 usec
DE         6.50 usec
TE        298.0 K
D1        1.00000000 sec
TD0       1
  
```

```

===== CHANNEL f1 =====
SFO1      600.1739011 MHz
NUC1       1H
P1         9.96 usec
SI         65536
SF        600.1699991 MHz
WDW        EM
SSB        0
LB         0.30 Hz
GB         0
PC         1.00
  
```

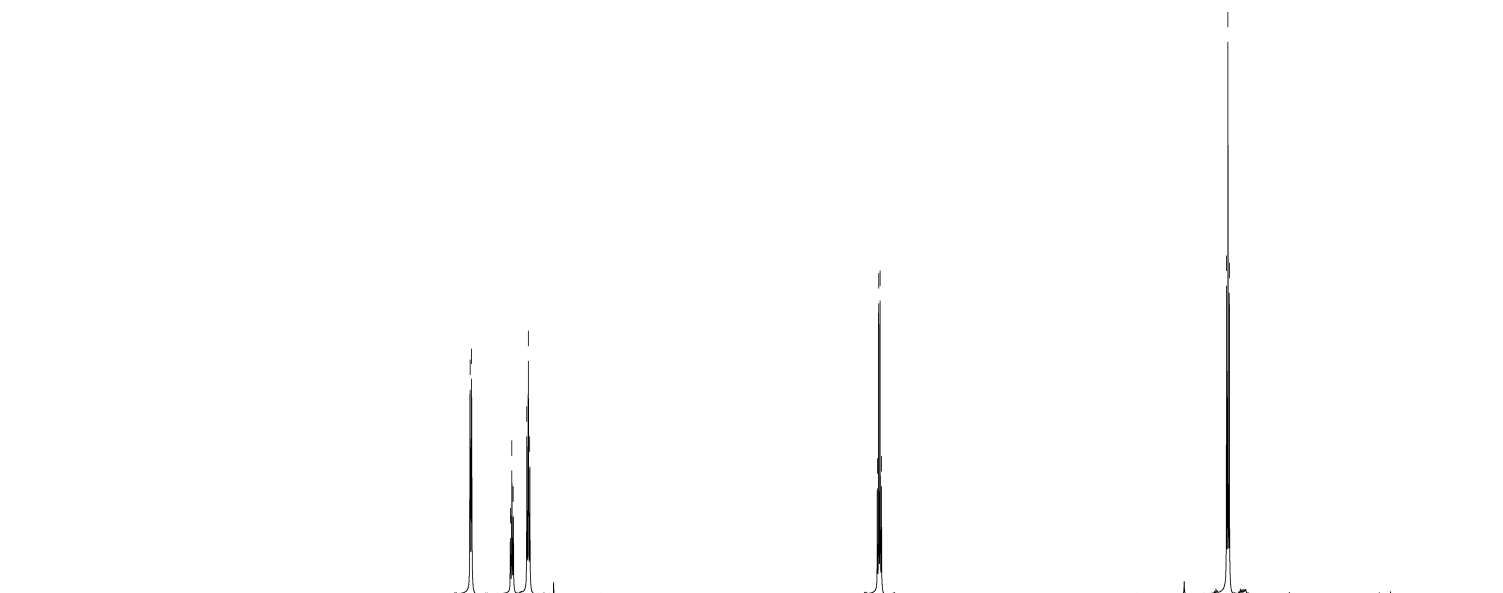

11 10 9 8 7 6 5 4 3 2 1 0 ppm

1.94  
1.02  
2.00

2.04

3.06

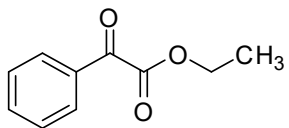

5

186.461

163.858

134.911

132.452

129.989

128.896

62.324

14.096

NAME GG-713P-20221111  
EXPNO 2  
PROCNO 1  
Date\_ 20221111  
Time 18.11  
INSTRUM spect  
PROBHD 5 mm PABBO BB/  
PULPROG zgpg30  
TD 65536  
SOLVENT CDCl3  
NS 800  
DS 4  
SWH 36057.691 Hz  
FIDRES 0.550197 Hz  
AQ 0.9088159 sec  
RG 190.02  
DW 13.867 usec  
DE 6.50 usec  
TE 298.0 K  
D1 2.00000000 sec  
D11 0.03000000 sec  
TD0 1

===== CHANNEL f1 =====  
SFO1 150.9279571 MHz  
NUC1 13C  
P1 11.90 usec  
SI 32768  
SF 150.9128665 MHz  
WDW EM  
SSB 0  
LB 1.00 Hz  
GB 0  
PC 1.40

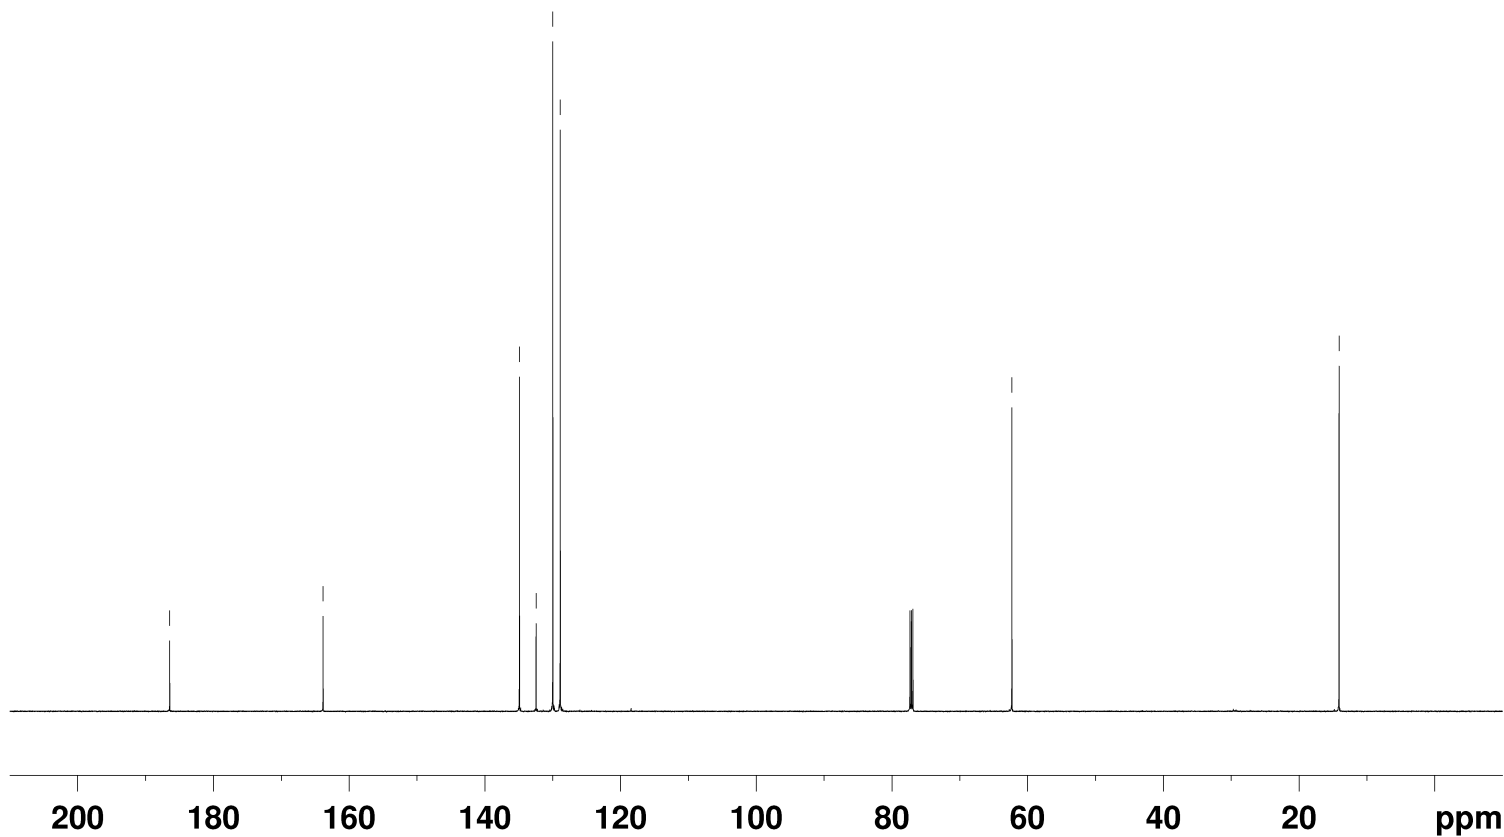

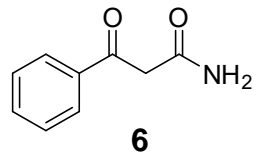

8.007  
7.994  
7.638  
7.626  
7.614  
7.518  
7.505  
7.492

3.981

```

NAME      GG780P2--20221120
EXPNO     1
PROCNO    1
Date_     20221120
Time      17.59
INSTRUM   spect
PROBHD    5 mm PABBO BB/
PULPROG   zg30
TD         65536
SOLVENT   CDC13
NS         8
DS         0
SWH       9615.385 Hz
FIDRES    0.146719 Hz
AQ         3.4079220 sec
RG         96.28
DW         52.000 usec
DE         6.50 usec
TE         298.0 K
D1         1.00000000 sec
TD0        1
  
```

```

===== CHANNEL f1 =====
SFO1      600.1739011 MHz
NUC1       1H
P1         9.96 usec
SI         65536
SF         600.1700113 MHz
WDW        EM
SSB        0
LB         0.30 Hz
GB         0
PC         1.00
  
```

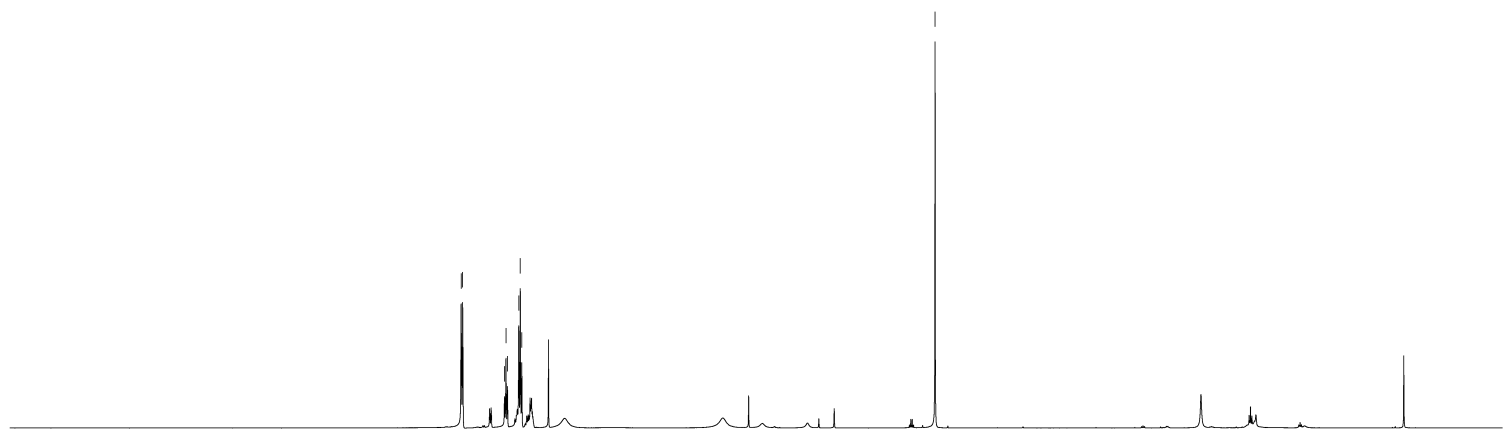

11 10 9 8 7 6 5 4 3 2 1 0 ppm

2.04  
1.03  
2.04

2.00

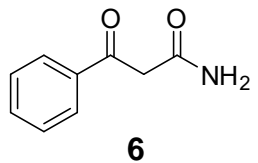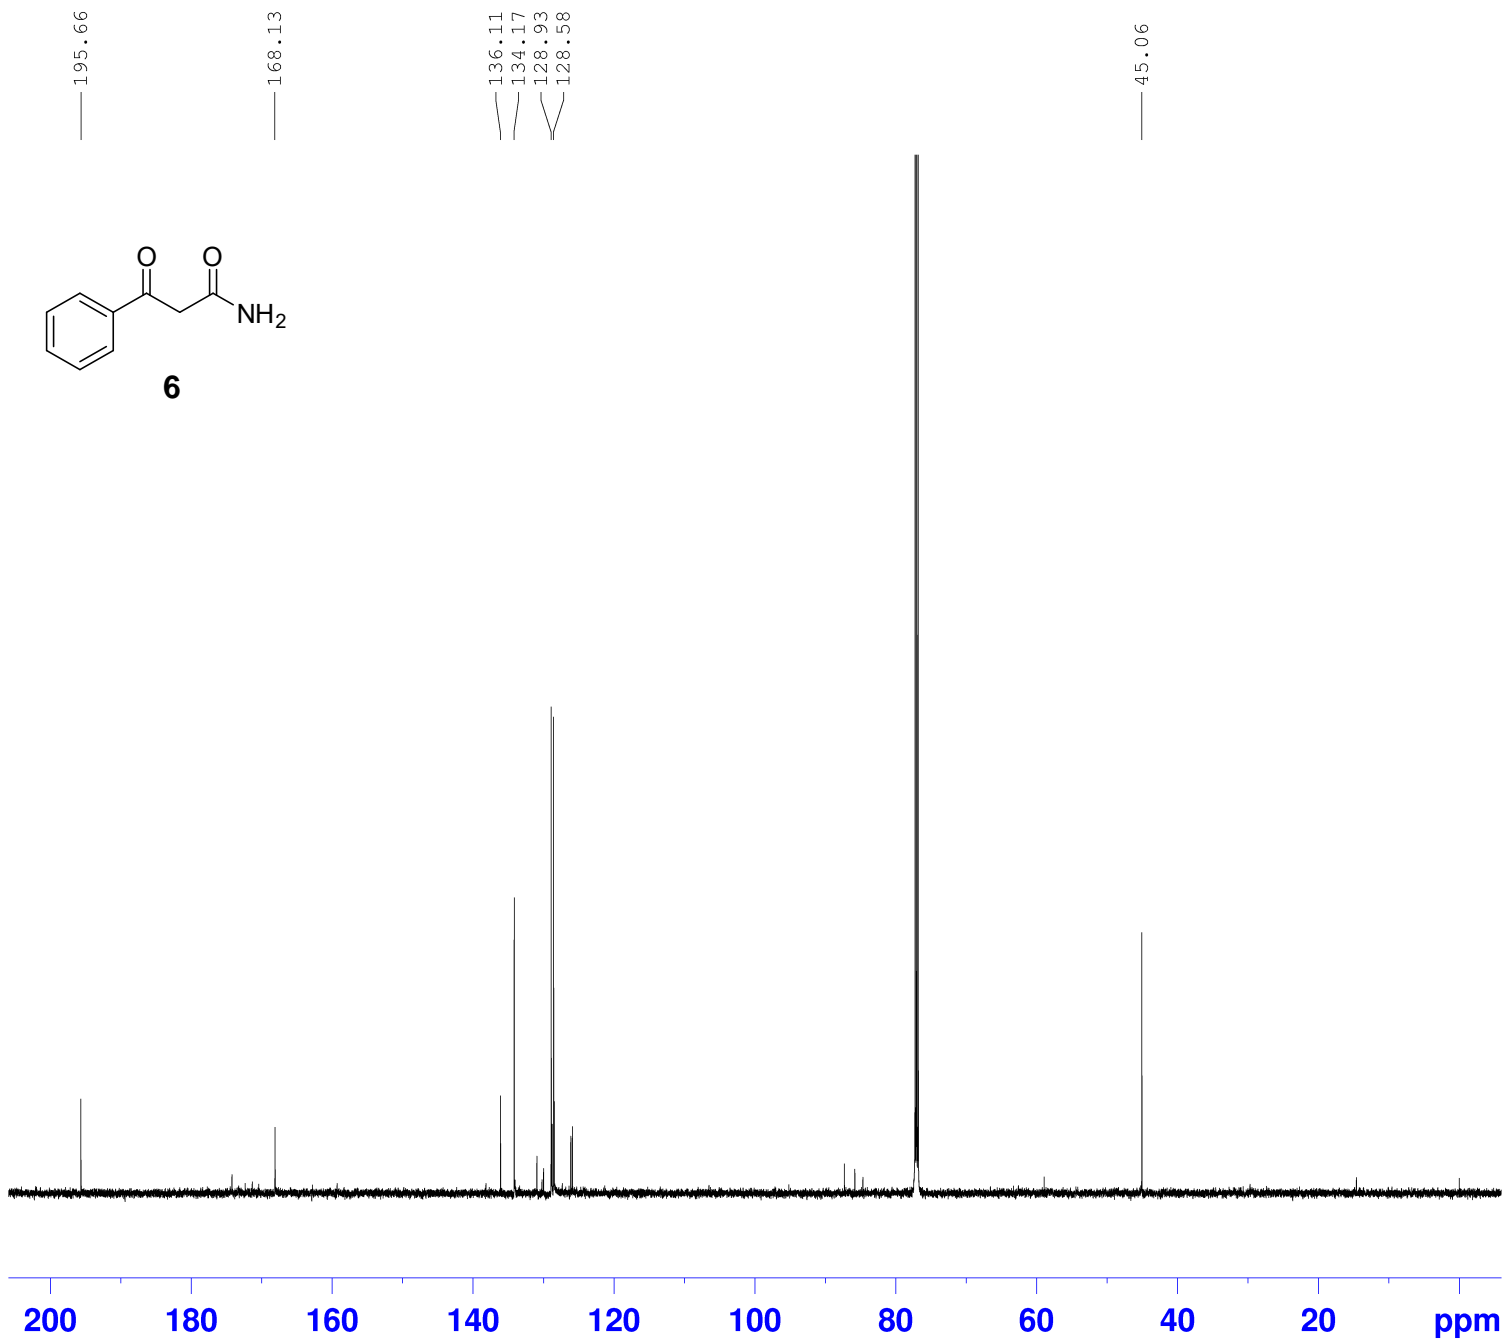

```

NAME      GG780P2--20221120
EXPNO     2
PROCNO    1
Date_     20221120
Time      18.40
INSTRUM   spect
PROBHD    5 mm PABBO BB/
PULPROG   zgpg30
TD        65536
SOLVENT   CDCl3
NS        800
DS        4
SWH       36057.691 Hz
FIDRES    0.550197 Hz
AQ        0.9088159 sec
RG        190.02
DW        13.867 usec
DE        6.50 usec
TE        298.0 K
D1        2.00000000 sec
D11       0.03000000 sec
TD0       1
  
```

```

===== CHANNEL f1 =====
SFO1     150.9279571 MHz
NUC1     13C
P1       11.90 usec
SI       32768
SF       150.9128665 MHz
WDW      EM
SSB      0
LB       1.00 Hz
GB       0
PC       1.40
  
```
